# Supplementary material
Source: MDPI journal article supplement (https://www.mdpi.com/2674-1172/1/2/9)

## SUPPLEMENTARY INFORMATION

### Supplementary Figure S1. Derivation of CVS-TOs.

**a-c**, Isolation and single-cell transcriptional profiling of trophoblast populations from CVS tissue. **a**, CVS tissue obtained from first-trimester pregnancies (10-14 weeks of gestation). Inset shows magnification of villi. Arrows highlight the mesenchymal core and villous protrusions. **b,c**, Single-cell profiling of cells derived from CVS tissue ( $n = 6,481$ ). **b**, UMAP plot showing 4 distinct clusters (Trophoblast,  $n = 5,759$ ; Stromal cells,  $n = 437$ ; Hofbauer cells,  $n = 158$ ; Fetal blood cells,  $n = 127$ ). **c**, Dotplot showing normalized expression and percentage of expressing cells for a range of marker genes. **d**, Outgrowth of EVT-like cells after depletion of Wnt stimulators. Brightfield images of EVT outgrowth in CVS-TOs cultured in trophoblast organoid medium deprived for Wnt stimulators. EVT cell population is highlighted in the magnification. Scale bars, 200  $\mu\text{m}$ .

### Supplementary Figure S2. Genotyping of CVS-TOs.

**a**, Genotyping of DS-TOs using SNP array analysis. Log2 Ratio and B-allele frequency plots of the whole genome confirmed trisomy 21. Altered percentages of B-allele frequencies observed for chromosome 21 in DS-TOs. **b**, Sanger sequencing confirmed *SMC1A*; c.532A>C mutation in CdLS-TOs.

### Supplementary Figure S3. Clustering and cluster proportions of integrated single-cell transcriptional profiles of DS-TOs, CdLS-TOs and control CVS-TOs.

**a**, Table showing cluster proportions and corresponding cell numbers for the integrated single-cell transcriptional profiles of DS-TOs, CdLS-TOs and control CVS-TOs at day 14 of culture. **b**, Relative differences in cell proportions for each cluster between CdLS-TOs versus control CVS-TOs and CdLS-TOs versus DS-TOs. Red clusters have an FDR  $< 0.05$  and mean log2 fold enrichment  $> 1$  compared with control or DS-TOs (permutation test;  $n = 10,000$ ). **c**, Relative differences in cell proportions for each cluster between DS-TOs versus control (permutation test;  $n = 10,000$ ).

### Supplementary Figure S4. Population of progenitor CTBs expressing stress markers.

UMAP plots showing normalized expression of stress markers *FOS*, *FOSB*, *JUN*, *JUNB*, *ATF3* and *KLF6* in the integrated CVS-TO single-cell dataset.

**Supplementary Table S1:** Summary of CVS-TO derivation and characterization.

**Supplementary Table S2:** Differential gene expression analysis in CVS-TOs. Genes were identified using the following thresholds: minimum log fold change value > 0.25; adjusted p-value < 0.01; detected in a minimum of 25% cells in each cluster. First sheet shows differentially expressed genes per cluster in control CVS-TOs. Second sheet shows differentially expressed genes per cluster in the integrated CVS-TO single-cell dataset (DS-TOs, CdLS-TOs and control CVS-TOs).

**Supplementary Table S3:** LC-MS/MS analysis of CVS-TO supernatants.

Supplementary Figure S1

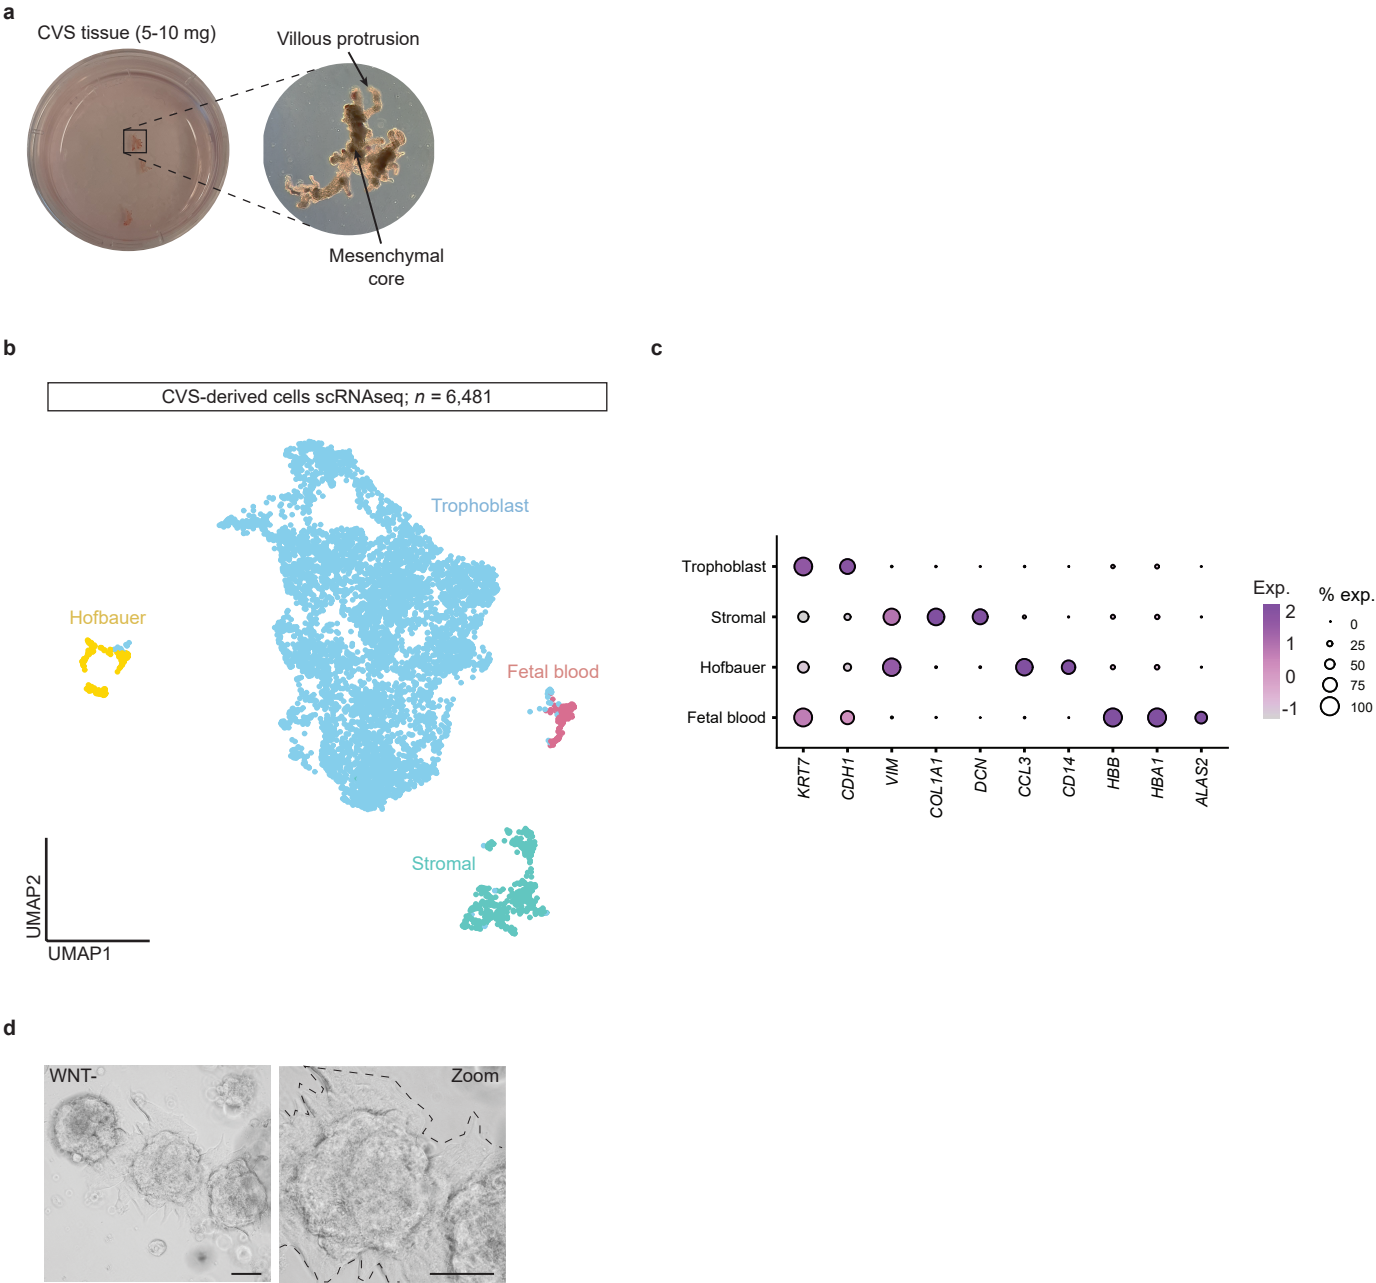

a

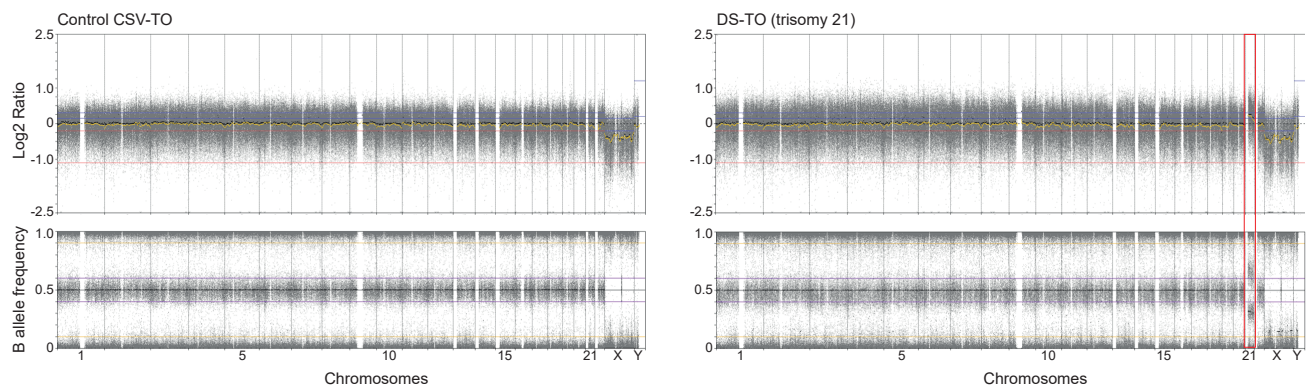

b

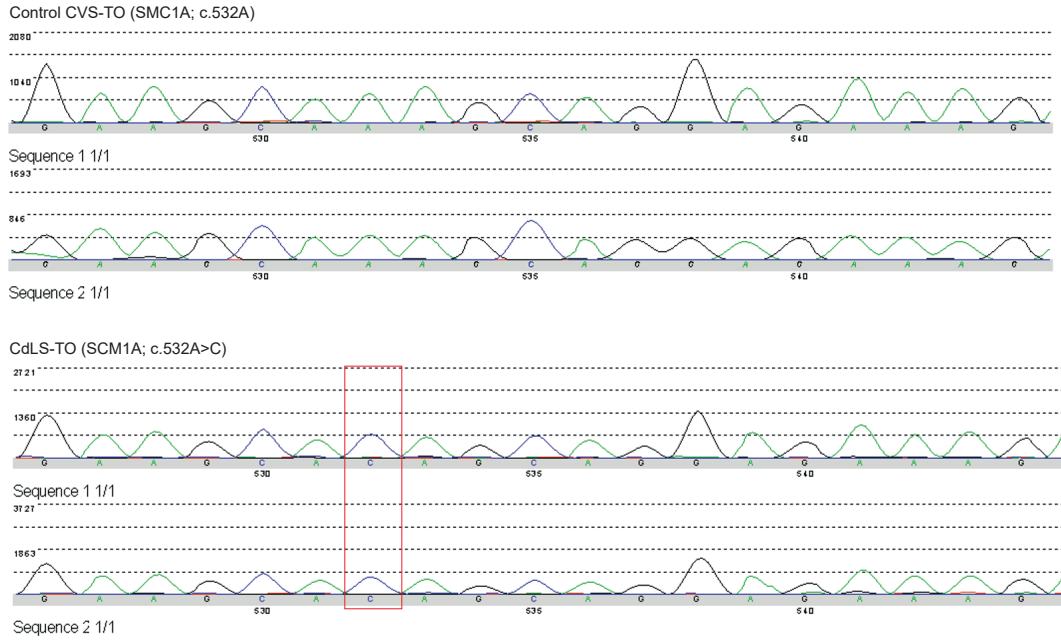

Supplementary Figure S3

a

| Cluster                 | DS-TO ( <i>n</i> = 12,816) | CdLS-TO ( <i>n</i> = 15,509) | Control-TO ( <i>n</i> = 15,901) |
|-------------------------|----------------------------|------------------------------|---------------------------------|
| CTB 2                   | 3335 (26%)                 | 658 (4%)                     | 3207 (20%)                      |
| CTB progenitor-like     | 1038 (8%)                  | 4917 (32%)                   | 833 (5%)                        |
| CTB cycling 1           | 2257 (18%)                 | 2259 (15%)                   | 2164 (14%)                      |
| SCT progenitor          | 1888 (15%)                 | 228 (1%)                     | 3682 (23%)                      |
| SCT 2                   | 1386 (11%)                 | 254 (1%)                     | 2582 (16%)                      |
| CTB progenitor stressed | 573 (4%)                   | 3826 (25%)                   | 485 (3%)                        |
| CTB cycling 2           | 674 (5%)                   | 1370 (9%)                    | 672 (4%)                        |
| CTB 1                   | 816 (6%)                   | 555 (4%)                     | 1202 (8%)                       |
| CTB progenitor          | 604 (5%)                   | 1385 (9%)                    | 502 (3%)                        |
| SCT 1                   | 245 (2%)                   | 57 (0%)                      | 572 (4%)                        |

b

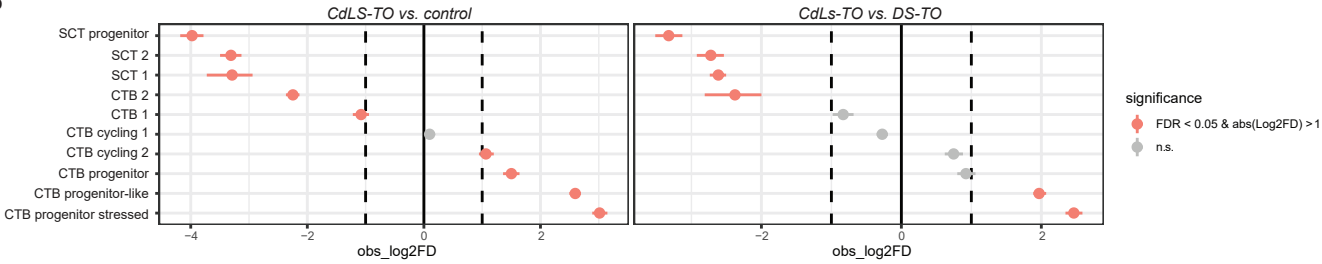

c

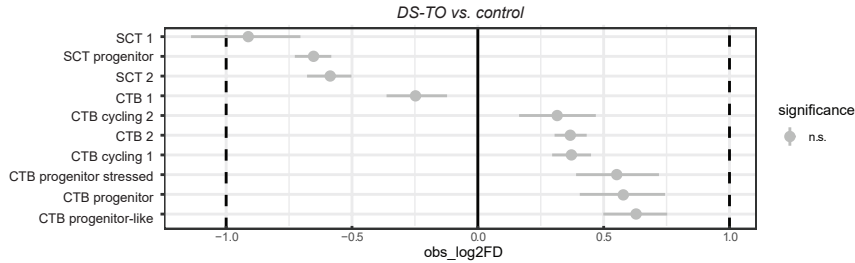

Supplementary Figure S4

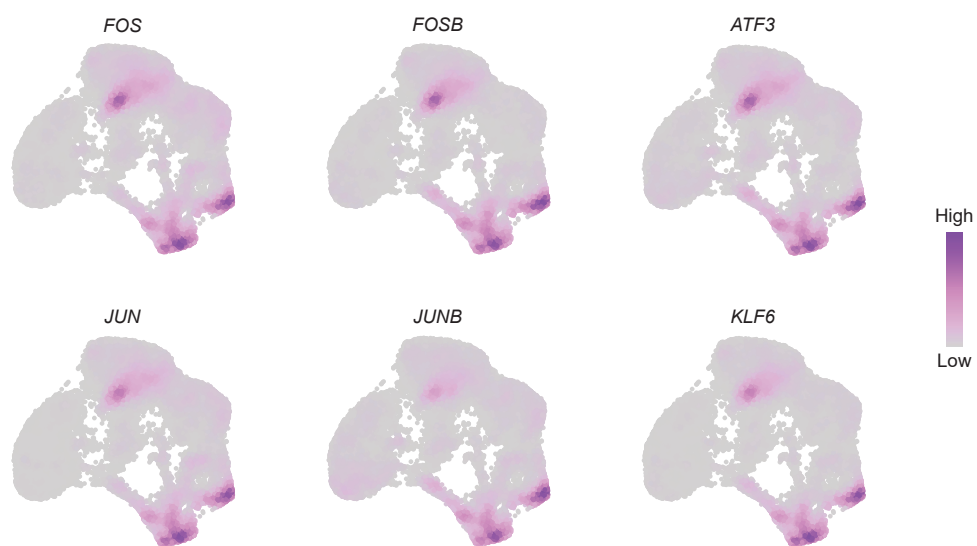

Supplement: s1 [file s1 › CVS_TO_supplementary_material.pdf]
