# Supplementary material
Source: MDPI journal article supplement (https://www.mdpi.com/2674-1172/1/2/9)
Supplement: s1 [file s1]

Archive with 4 entries (4 files):
- CVS_TO_supplementary_material.pdf
- TableS1_Summary_CVS-TO_derivation_characterization.xlsx
- TableS2_DEG_analysis_CVS_TO.xlsx
- TableS3_Mass_spectometry_CVS-TO_supernatant.xlsx
