# Supplementary material
Source: MDPI journal article supplement (https://www.mdpi.com/2674-1172/1/2/9)
Supplement: s1 [file s1 › TableS1_Summary_CVS-TO_derivation_characterization.xlsx]

## Sheet: Summary
Sample ID	Alternative ID	GA (wk+d)	Derivation	CVS karyotype/genotype	scRNA-seq	Genotyping	Mass spec	Whole mount IF	Long term culture	EVT outgrowth	hCG-test*
CVS_TO_01	Control CVS-TO	11+3		Normal		Array
CVS_TO_02	DS-TO	11+5		Trisomy 21		Array
CVS_TO_03		12+6		Normal
CVS_TO_04		14+2		Normal
CVS_TO_05		12+0		Normal
CVS_TO_06	Control CVS-TO	12+1		Normal		Array
CVS_TO_07	Control CVS-TO	13+0		Normal		Sanger
CVS_TO_08		11+6		Normal
CVS_TO_09		11+0		Normal
CVS_TO_10	CdLS-TO	11+2		Normal		Sanger
CVS_TO_11		11+3		Normal
CVS_TO_12		11+4		Normal
CVS_TO_13		11+4		Normal
CVS_TO_14		13+2		Normal
CVS_TO_15		11+1		Normal
CVS_TO_16		11+6		Normal
CVS_TO_17		10+4		Normal; SMC1A c.532A>C
CVS_TO_18		10+3		45,XY,der(13;14)(q10;q10)mat
CVS_TO_19		13+5		Normal
CVS_TO_20		14+3		16q24.3 deletion
CVS_TO_21		14+4		Normal
CVS_TO_22		14+5		Trisomy 8
CVS_TO_23		11+1		Normal
CVS_TO_24		12+1		Normal
CVS_TO_25		12+3		Normal
*Over-the-counter pregnancy tests were used on culture supernatants as a quick screen for successful TO derivation
