# Supplementary material
Source: MDPI journal article supplement (https://www.mdpi.com/2674-1172/1/2/9)
Supplement: s1 [file s1 › TableS2_DEG_analysis_CVS_TO.xlsx]

## Sheet: CVS_TO control
gene	p_val	avg_log2FC	pct.1	pct.2	p_val_adj	cluster
MALAT1	0	2663273715	0.993	0.724	0	CTB progenitor
FSTL3	0	2627233813	0.908	0.346	0	SCT 1
NEAT1	0	2121311989	0.893	0.283	0	CTB progenitor
CGA	0	1853896758	1	1	0	SCT 2
FLT1	0	1844996609	0.733	0.171	0	SCT 1
GDF15	0	1840489098	0.999	0.85	0	SCT 2
CSH1	0	1788552438	0.814	0.504	0	SCT 2
PSG3	0	1625682075	0.985	0.558	0	SCT 2
KISS1	0	1619388164	0.963	0.753	0	SCT 2
FBN2	0	1543510513	0.947	0.155	0	CTB progenitor
TFPI2	0	1523684828	0.877	0.422	0	SCT 2
TIMP2	0	1511698483	0.988	0.564	0	SCT 2
CYP19A1	0	1443926703	0.993	0.617	0	SCT 2
CGB	0	1433911058	0.997	0.814	0	SCT 2
PGF	0	1360056642	0.982	0.593	0	SCT 2
CDKN1C	0	1356888933	0.998	0.893	0	CTB 1
FOS	1.93E-282	1355221006	0.554	0.138	3.09E-278	CTB progenitor
SDC1	0	1312695623	0.963	0.432	0	SCT 2
CD63	0	1277548823	0.997	0.815	0	SCT 2
PHLDA2	0	1251480738	0.995	0.891	0	CTB 1
DAB2	0	1235778455	0.972	0.489	0	SCT 2
PSG5	0	1227172592	0.879	0.334	0	SCT 2
NFE2L3	0	1218120054	0.907	0.211	0	CTB progenitor
HNRNPH1	0	1215163637	0.888	0.266	0	CTB progenitor
GLUL	0	1214907655	0.881	0.369	0	SCT 2
PSG1	0	121403303	0.854	0.307	0	SCT 2
ADAM12	0	1209864559	0.842	0.294	0	SCT 2
VGLL3	0	1199789006	0.916	0.332	0	SCT 2
PSG6	0	1188507156	0.882	0.297	0	SCT 2
B2M	0	1175040086	0.917	0.414	0	CTB progenitor
EFEMP1	0	1172873847	0.909	0.293	0	CTB progenitor
TFPI	0	1163048523	0.898	0.353	0	SCT 2
HSD3B1	0	1161477721	0.889	0.284	0	SCT 2
GLRX	0	1159847833	0.889	0.33	0	SCT 2
PSG4	0	1156252037	0.858	0.275	0	SCT 2
CTSB	0	1153697973	0.951	0.488	0	SCT 2
FDX1	0	1146366788	0.968	0.553	0	SCT 2
S100P	0	1119252747	0.973	0.585	0	SCT 2
CD59	0	1107889638	0.935	0.455	0	SCT 2
S100A6	8.75E-229	1097223245	0.915	0.669	1.40E-224	SCT 1
CGA	4.09E-224	1087793787	1	1	6.56E-220	SCT 1
CALR	0	1067477901	0.993	0.763	0	SCT 2
HSPA5	0	1061457793	0.949	0.583	0	SCT 2
LIFR	0	105253584	0.752	0.258	0	SCT 2
BASP1	0	1045170049	0.956	0.508	0	SCT 2
FBLN1	0	104432861	0.992	0.799	0	SCT 2
HSP90B1	0	1027905129	0.944	0.627	0	SCT 2
HSD11B2	0	1021595273	0.787	0.232	0	SCT 2
MEST	0	1015438064	0.912	0.314	0	CTB progenitor
ITM2B	0	1010052771	0.936	0.516	0	SCT 2
DSP	0	1004509433	0.847	0.199	0	CTB progenitor
CGB8	0	0.999724489	0.815	0.241	0	SCT 2
RYBP	0	0.988052384	0.861	0.305	0	SCT 2
PDIA3	0	0.985294163	0.957	0.582	0	SCT 2
LRP2	0	0.982724551	0.673	0.036	0	CTB progenitor
ANXA1	2.68E-195	0.97462057	0.974	0.821	4.30E-191	CTB 1
TGM2	0	0.971852946	0.919	0.535	0	SCT 2
HSD17B1	0	0.964268923	0.999	0.861	0	SCT 2
FKBP2	0	0.964221226	0.949	0.569	0	SCT 2
TFRC	0	0.96346703	0.725	0.186	0	CTB progenitor
CLIC3	0	0.96244694	0.927	0.482	0	SCT 2
KRT23	3.59E-226	0.959017607	0.869	0.558	5.76E-222	CTB 1
MYDGF	0	0.94794927	0.909	0.476	0	SCT 2
PSG2	0	0.943536081	0.76	0.237	0	SCT 2
TFPI	5.59E-208	0.943026608	0.812	0.394	8.96E-204	SCT 1
TMSB10	0	0.936051669	0.979	0.706	0	CTB cycling
BASP1	1.80E-230	0.931937658	0.914	0.54	2.89E-226	SCT 1
APLP2	0	0.926314427	0.927	0.363	0	CTB progenitor
PPIB	0	0.92619809	0.987	0.784	0	SCT 2
SLC38A1	0	0.925561444	0.848	0.362	0	SCT 2
MAN1A2	0	0.924382531	0.794	0.282	0	SCT 2
ISM2	0	0.91644957	0.696	0.106	0	CTB progenitor
SPINT2	1.77E-257	0.914087327	0.981	0.601	2.84E-253	CTB progenitor
JUN	0	0.911877056	0.436	0.062	0	CTB progenitor
PAGE4	0	0.905009612	0.999	0.937	0	CTB cycling
HMOX1	1.92E-217	0.904802909	0.738	0.374	3.07E-213	CTB 1
STS	0	0.903714824	0.778	0.266	0	SCT 2
ITGA6	0	0.899389211	0.684	0.079	0	CTB progenitor
SGK1	0	0.898920273	0.713	0.262	0	CTB 1
ENG	4.06E-264	0.898411638	0.766	0.306	6.51E-260	SCT 1
PLIN2	6.91E-266	0.896601653	0.673	0.236	1.11E-261	SCT 1
HSPB8	0	0.889854316	0.918	0.492	0	SCT 2
CTSC	0	0.889104661	0.805	0.167	0	CTB progenitor
NABP1	0	0.882410383	0.583	0.126	0	CTB progenitor
KRT19	3.12E-199	0.879985064	0.861	0.548	5.01E-195	SCT 1
SYNE2	0	0.877489297	0.773	0.169	0	CTB progenitor
HSPD1	2.06E-242	0.876701212	0.933	0.484	3.30E-238	CTB progenitor
HSPB1	0	0.874208194	0.977	0.715	0	SCT 2
GJA5	0	0.869718839	0.656	0.087	0	CTB progenitor
ADM	0	0.868404323	0.724	0.23	0	SCT 2
CALU	0	0.867323682	0.787	0.276	0	SCT 2
CLIC3	1.42E-198	0.866769758	0.874	0.514	2.27E-194	SCT 1
S100A10	0	0.863798627	0.844	0.396	0	CTB cycling
TENM3	0	0.861251196	0.705	0.088	0	CTB progenitor
RPS2	0	0.856234848	0.999	0.949	0	CTB cycling
CLIC4	0	0.855601668	0.797	0.296	0	SCT 2
PSG9	0	0.855391359	0.638	0.18	0	SCT 2
LY6E	1.00E-215	0.854061863	0.824	0.367	1.60E-211	CTB progenitor
S100A9	0	0.853146402	0.829	0.401	0	SCT 2
SRSF7	0	0.852688979	0.854	0.262	0	CTB progenitor
PNN	0	0.852619888	0.714	0.056	0	CTB progenitor
RPS23	0	0.852599774	1	0.973	0	CTB cycling
MT-CO2	8.18E-158	0.852378102	1	1	1.31E-153	CTB progenitor
RPL26	0	0.852211086	0.993	0.871	0	CTB cycling
SLC27A2	0	0.84905273	0.684	0.082	0	CTB progenitor
NUCB2	0	0.843086178	0.779	0.275	0	SCT 2
SLC7A5	0	0.84144366	0.797	0.321	0	SCT 2
INSL4	0	0.838649155	0.697	0.197	0	SCT 2
AQP3	0	0.83824939	0.666	0.159	0	SCT 2
CGB	3.77E-167	0.831093496	0.979	0.827	6.05E-163	SCT 1
GADD45G	2.94E-269	0.828712121	0.621	0.22	4.71E-265	CTB 1
PEG3	2.16E-264	0.827675349	0.916	0.375	3.46E-260	CTB progenitor
PAPPA	0	0.826799477	0.483	0.145	0	SCT 2
RPS18	0	0.824972347	1	0.987	0	CTB cycling
RPS3	0	0.824787164	1	0.979	0	CTB cycling
CYP11A1	0	0.823915292	0.948	0.564	0	SCT 2
TMBIM6	0	0.818163992	0.937	0.587	0	SCT 2
TGFB1	0	0.81570523	0.744	0.237	0	SCT 2
WSB1	0	0.815098123	0.715	0.172	0	CTB progenitor
CMTM6	0	0.813461701	0.826	0.256	0	CTB progenitor
TINAGL1	3.27E-295	0.810720264	0.83	0.285	5.25E-291	CTB progenitor
PEG10	3.06E-210	0.807775325	0.997	0.964	4.90E-206	CTB 1
RPSA	0	0.807278812	0.988	0.805	0	CTB cycling
RPS15A	0	0.804860708	0.994	0.904	0	CTB cycling
GPC3	0	0.80188451	0.694	0.191	0	SCT 2
HSP90AB1	1.83E-177	0.801792272	0.956	0.704	2.93E-173	CTB progenitor
GDF15	0	0.79849854	0.998	0.826	0	SCT progenitor
RPLP1	0	0.796975844	1	0.993	0	CTB cycling
PSCA	0	0.793777931	0.688	0.201	0	SCT 2
PTMA	0	0.791152356	0.986	0.832	0	CTB cycling
ERVW-1	0	0.789477081	0.862	0.432	0	SCT 2
KISS1	0	0.786349067	0.959	0.721	0	SCT progenitor
C1QBP	2.45E-204	0.785648553	0.892	0.455	3.93E-200	CTB progenitor
TUBA1B	0	0.785637471	0.847	0.479	0	CTB cycling
CANX	0	0.785523941	0.876	0.491	0	SCT 2
PPIA	0	0.783473076	0.97	0.715	0	CTB cycling
SRRM2	0	0.783260006	0.863	0.262	0	CTB progenitor
SLC16A1	0	0.782790388	0.677	0.098	0	CTB progenitor
MFSD12	0	0.780232404	0.854	0.381	0	SCT 2
DNMT1	0	0.780176124	0.858	0.237	0	CTB progenitor
HNRNPDL	1.51E-281	0.779057392	0.889	0.346	2.43E-277	CTB progenitor
INHA	6.61E-209	0.777672527	0.623	0.23	1.06E-204	SCT 1
CTSL	0	0.777292985	0.892	0.508	0	SCT 2
TAF1D	0	0.775159621	0.763	0.143	0	CTB progenitor
CGB7	0	0.774283884	0.679	0.211	0	SCT 2
RPL3	0	0.774057403	0.997	0.948	0	CTB cycling
RPS3A	0	0.773529456	0.998	0.944	0	CTB cycling
MGST3	6.73E-180	0.773274252	0.925	0.632	1.08E-175	CTB progenitor
CD164	0	0.77276098	0.787	0.324	0	SCT 2
HOPX	0	0.772082154	0.672	0.198	0	SCT 2
DEGS1	0	0.770855812	0.675	0.136	0	CTB progenitor
GM2A	0	0.768292162	0.697	0.251	0	SCT 2
S100A9	3.12E-153	0.765779952	0.776	0.432	5.00E-149	SCT 1
CDKN1A	0	0.765679935	0.678	0.217	0	SCT 2
DUSP5	0	0.765587961	0.864	0.468	0	SCT 2
FOSB	0	0.762438595	0.457	0.042	0	CTB progenitor
TMED10	0	0.762268054	0.765	0.285	0	SCT 2
MANF	0	0.761711032	0.769	0.319	0	SCT 2
RPS19	0	0.761575317	1	0.989	0	CTB cycling
RPS27A	0	0.758517754	0.999	0.965	0	CTB cycling
ABCG2	0	0.757733261	0.689	0.2	0	SCT 2
RPL7A	0	0.7577202	0.999	0.962	0	CTB cycling
LEP	8.73E-252	0.754188988	0.565	0.231	1.40E-247	SCT 2
TMED9	0	0.752826881	0.89	0.501	0	SCT 2
ITGB1	0	0.752467879	0.735	0.143	0	CTB progenitor
LMAN1	0	0.74985915	0.778	0.341	0	SCT 2
RPS12	0	0.749152778	1	0.993	0	CTB cycling
ITGAV	0	0.748429766	0.689	0.15	0	CTB progenitor
RPL30	0	0.748163497	0.993	0.911	0	CTB cycling
GCSH	5.41E-210	0.747169296	0.764	0.311	8.67E-206	CTB progenitor
EVA1B	0	0.746770153	0.809	0.394	0	SCT 2
HEXB	0	0.742350945	0.734	0.279	0	SCT 2
COL14A1	0	0.741077437	0.604	0.08	0	CTB progenitor
SLC2A1	2.69E-153	0.74050955	0.814	0.491	4.32E-149	SCT 1
RPL32	0	0.737041028	0.999	0.981	0	CTB cycling
NPM1	0	0.734837508	0.972	0.808	0	CTB cycling
AFF1	0	0.734539551	0.643	0.182	0	SCT 2
CYP19A1	7.29E-158	0.73425573	0.944	0.644	1.17E-153	SCT 1
APP	7.24E-270	0.732948947	0.801	0.266	1.16E-265	CTB progenitor
RBM39	0	0.731335772	0.796	0.201	0	CTB progenitor
FDX1	4.01E-146	0.730749353	0.889	0.585	6.43E-142	SCT 1
CD24	1.32E-192	0.730362077	0.882	0.42	2.12E-188	CTB progenitor
RPL11	0	0.730102394	0.999	0.976	0	CTB cycling
CGB	0	0.729901467	0.997	0.785	0	SCT progenitor
RPS13	0	0.728824275	0.996	0.944	0	CTB cycling
RPS5	0	0.728216243	0.989	0.867	0	CTB cycling
CSH1	9.54E-289	0.725688784	0.748	0.476	1.53E-284	SCT progenitor
TUSC3	0	0.725598014	0.756	0.316	0	SCT 2
SLC40A1	7.93E-196	0.72480364	0.681	0.318	1.27E-191	CTB 1
HINT1	0	0.724749331	0.811	0.385	0	CTB cycling
RPL13	0	0.724103941	1	0.987	0	CTB cycling
RPL39	0	0.723856168	0.997	0.96	0	CTB cycling
INHA	0	0.723308254	0.674	0.196	0	SCT 2
RPL18A	0	0.722266357	0.999	0.972	0	CTB cycling
FBN1	0	0.72135275	0.508	0.047	0	CTB progenitor
RPL12	0	0.721130818	0.995	0.925	0	CTB cycling
ATP2B1	0	0.720362432	0.604	0.062	0	CTB progenitor
SPINT1	4.18E-212	0.718868018	0.864	0.376	6.70E-208	CTB progenitor
RPL10	0	0.717845689	0.999	0.978	0	CTB cycling
CLDN4	3.62E-221	0.717639131	0.728	0.261	5.80E-217	CTB progenitor
CGB5	0	0.716379095	0.626	0.16	0	SCT 2
KRT7	0	0.713568615	0.895	0.552	0	CTB cycling
PNISR	0	0.712654578	0.64	0.078	0	CTB progenitor
RPL14	0	0.711692015	0.996	0.914	0	CTB cycling
RPS14	0	0.709847977	0.997	0.942	0	CTB cycling
RPS8	0	0.709396148	0.999	0.98	0	CTB cycling
RPL35A	0	0.708578488	0.976	0.813	0	CTB cycling
TUBB	0	0.708021109	0.823	0.456	0	CTB cycling
RPL28	0	0.706776172	0.999	0.97	0	CTB cycling
NUCB2	6.45E-193	0.705537077	0.724	0.312	1.03E-188	SCT 1
ENG	0	0.705529952	0.741	0.278	0	SCT 2
PRKDC	0	0.705163477	0.708	0.149	0	CTB progenitor
RPL6	0	0.704249818	0.99	0.879	0	CTB cycling
RPS24	0	0.704167453	1	0.98	0	CTB cycling
H2AFZ	1.61E-119	0.703889492	0.898	0.695	2.58E-115	CTB 1
RPS4X	0	0.701724164	0.993	0.919	0	CTB cycling
SDF2L1	0	0.699608889	0.704	0.297	0	SCT 2
CCNL1	0	0.699066982	0.547	0.049	0	CTB progenitor
MT-CO1	3.78E-97	0.698763852	1	1	6.06E-93	CTB progenitor
LDHA	3.90E-102	0.696910908	0.74	0.479	6.25E-98	SCT 1
LEP	8.97E-117	0.696545767	0.55	0.254	1.44E-112	SCT 1
YBX1	0	0.695961891	0.855	0.476	0	CTB cycling
RPL41	0	0.695924649	0.992	0.927	0	CTB cycling
RPS27	0	0.695510299	0.999	0.967	0	CTB cycling
RPL29	0	0.695314564	0.996	0.918	0	CTB cycling
RPL5	0	0.695038362	0.987	0.87	0	CTB cycling
FAM107B	0	0.694865482	0.711	0.263	0	SCT 2
LRP1	0	0.694244249	0.562	0.067	0	CTB progenitor
ARGLU1	0	0.693607727	0.654	0.138	0	CTB progenitor
SRSF11	0	0.692346404	0.754	0.182	0	CTB progenitor
SERPINF1	1.03E-264	0.692216657	0.769	0.249	1.65E-260	CTB progenitor
HMGA1	0	0.691734661	0.88	0.503	0	CTB cycling
RPS9	0	0.689618431	0.988	0.853	0	CTB cycling
LAMC1	0	0.68939476	0.596	0.085	0	CTB progenitor
RPLP0	0	0.688924078	0.993	0.876	0	CTB cycling
FTL	1.64E-228	0.688689545	0.971	0.817	2.62E-224	SCT 2
SPCS3	0	0.687951988	0.72	0.282	0	SCT 2
MAOA	0	0.68590423	0.621	0.14	0	SCT 2
AKR1B1	1.58E-140	0.68552757	0.954	0.816	2.53E-136	CTB 1
RPL10A	0	0.684797342	0.969	0.771	0	CTB cycling
FAM46A	0	0.683846594	0.637	0.199	0	SCT 2
RPS6	0	0.683666508	0.997	0.94	0	CTB cycling
BTG3	6.09E-186	0.682871839	0.629	0.286	9.77E-182	CTB 1
HNRNPA2B1	3.50E-189	0.68210698	0.966	0.572	5.61E-185	CTB progenitor
FUS	5.39E-277	0.679923675	0.684	0.188	8.65E-273	CTB progenitor
ITGB4	0	0.67964075	0.501	0.051	0	CTB progenitor
RAN	0	0.67951742	0.891	0.558	0	CTB cycling
CDH1	0	0.679333604	0.58	0.082	0	CTB progenitor
SLC2A3	7.22E-269	0.677582125	0.542	0.12	1.16E-264	CTB progenitor
MFSD2A	0	0.676678424	0.591	0.129	0	SCT 2
ADGRG6	0	0.676143823	0.563	0.131	0	SCT 2
MESDC2	0	0.674733187	0.73	0.304	0	SCT 2
CYR61	0	0.674559826	0.327	0.028	0	CTB progenitor
SQLE	0	0.674468028	0.725	0.299	0	SCT 2
P4HB	3.49E-298	0.674343883	0.91	0.585	5.60E-294	SCT 2
RABAC1	0	0.67369473	0.714	0.282	0	SCT 2
EPAS1	0	0.671172496	0.694	0.274	0	SCT 2
TSC22D1	5.82E-105	0.671005918	0.521	0.232	9.34E-101	CTB progenitor
CSRP1	0	0.670124203	0.676	0.22	0	SCT 2
RHOBTB3	0	0.668920624	0.6	0.167	0	SCT 2
SMAGP	1.08E-191	0.668319496	0.667	0.24	1.73E-187	CTB progenitor
PDIA6	4.61E-287	0.668135738	0.814	0.443	7.40E-283	SCT 2
RPS25	0	0.667057039	0.966	0.77	0	CTB cycling
HIST1H4C	3.15E-79	0.663295291	0.291	0.096	5.05E-75	CTB progenitor
RRBP1	8.02E-180	0.663249675	0.746	0.302	1.29E-175	CTB progenitor
CGA	0	0.663222067	1	1	0	SCT progenitor
ERP44	0	0.663099098	0.642	0.188	0	SCT 2
CSH2	1.03E-245	0.662320041	0.39	0.115	1.65E-241	SCT 2
RPS15	0	0.661064102	0.999	0.973	0	CTB cycling
RPS7	0	0.660683292	0.989	0.928	0	CTB cycling
RANBP1	0	0.655736992	0.75	0.361	0	CTB cycling
HNRNPA1	0	0.655537783	0.942	0.699	0	CTB cycling
RPL34	0	0.655043516	0.994	0.915	0	CTB cycling
GAPDH	2.15E-135	0.65407382	0.998	0.95	3.45E-131	SCT 1
MCFD2	0	0.653878905	0.684	0.253	0	SCT 2
NPB	0	0.653535305	0.671	0.249	0	SCT 2
EBI3	1.22E-245	0.651796024	0.474	0.115	1.96E-241	SCT 1
C10orf54	0	0.650998955	0.686	0.245	0	SCT 2
INSIG1	0	0.650376128	0.813	0.402	0	SCT 2
RPL15	0	0.649799792	0.993	0.928	0	CTB cycling
RPL19	0	0.649602966	0.999	0.969	0	CTB cycling
S100A10	7.26E-115	0.649370224	0.813	0.473	1.16E-110	CTB progenitor
PEBP1	5.95E-143	0.648440614	0.867	0.534	9.54E-139	CTB progenitor
H3F3B	4.72E-159	0.64812928	0.857	0.574	7.58E-155	CTB 1
SERPINE1	0	0.647772156	0.635	0.223	0	SCT 2
RPL8	0	0.647488474	0.999	0.976	0	CTB cycling
ANGPT2	0	0.647312959	0.503	0.106	0	SCT 2
RPL37	0	0.647182125	0.99	0.906	0	CTB cycling
MT-ND4L	0	0.646492632	0.997	0.891	0	CTB 2
CALM1	7.52E-123	0.646422096	0.772	0.501	1.21E-118	SCT 1
C1QBP	0	0.645939391	0.778	0.397	0	CTB cycling
CREG1	0	0.642995411	0.633	0.192	0	SCT 2
GNB2L1	0	0.641864573	0.987	0.862	0	CTB cycling
CCNE1	3.85E-187	0.639555617	0.774	0.322	6.17E-183	CTB progenitor
FURIN	0	0.638599367	0.729	0.304	0	SCT 2
PCOLCE2	2.19E-306	0.637972305	0.596	0.131	3.51E-302	CTB progenitor
HERPUD1	2.11E-216	0.637467135	0.53	0.16	3.38E-212	SCT 1
RPS26	0	0.633454795	0.942	0.728	0	CTB cycling
HES2	0	0.633169696	0.61	0.154	0	SCT 2
NDUFA4	1.33E-146	0.630342786	0.834	0.46	2.14E-142	CTB progenitor
HSPE1	0	0.629608268	0.892	0.553	0	CTB cycling
PPP1CB	1.82E-143	0.627824933	0.812	0.544	2.92E-139	CTB 1
MT-ND2	0	0.62704987	1	0.971	0	CTB 2
RPL36	0	0.627048662	0.994	0.922	0	CTB cycling
CALM2	0	0.625091725	0.678	0.309	0	CTB cycling
PSG1	1.59E-104	0.62473756	0.668	0.356	2.55E-100	SCT 1
NCL	2.08E-137	0.623667401	0.896	0.537	3.33E-133	CTB progenitor
CD63	1.07E-142	0.622635766	0.986	0.827	1.71E-138	SCT 1
YBX1	6.38E-127	0.620916899	0.869	0.539	1.02E-122	CTB progenitor
SQSTM1	9.47E-115	0.620835933	0.878	0.647	1.52E-110	CTB 1
MT-ND1	0	0.620481643	1	0.971	0	CTB 2
RPL24	0	0.619926755	0.984	0.86	0	CTB cycling
EIF1	2.21E-170	0.617304092	0.96	0.842	3.54E-166	CTB 1
SRSF2	4.43E-241	0.617225393	0.789	0.269	7.10E-237	CTB progenitor
PRDX4	8.08E-183	0.616305215	0.731	0.287	1.30E-178	CTB progenitor
DNAJC3	0	0.615150226	0.59	0.18	0	SCT 2
SEC62	0	0.614136293	0.63	0.208	0	SCT 2
RPL27	0	0.613744649	0.973	0.786	0	CTB cycling
MUC15	0	0.61192397	0.57	0.171	0	SCT 2
MLLT1	8.76E-113	0.611294047	0.829	0.595	1.40E-108	CTB 1
COTL1	0	0.611202616	0.668	0.262	0	SCT 2
GCSH	0	0.608947565	0.648	0.251	0	CTB cycling
SAT1	0	0.608539475	0.999	0.963	0	SCT 2
RPL18	0	0.607741187	0.999	0.96	0	CTB cycling
SLC6A8	0	0.607633679	0.405	0.067	0	SCT 1
AIM1	5.75E-253	0.606035799	0.833	0.483	9.22E-249	SCT 2
KLF6	0	0.605429227	0.382	0.038	0	CTB progenitor
PPIB	1.93E-121	0.604370193	0.948	0.8	3.10E-117	SCT 1
PERP	1.60E-191	0.604135317	0.82	0.336	2.57E-187	CTB progenitor
MT-ND4	0	0.60411639	1	0.991	0	CTB 2
BPGM	0	0.604065282	0.572	0.152	0	SCT 2
GPNMB	0	0.603657486	0.537	0.139	0	SCT 2
RPL22L1	1.42E-144	0.602476591	0.684	0.3	2.27E-140	CTB progenitor
HSPE1	3.85E-117	0.602202669	0.904	0.609	6.17E-113	CTB progenitor
CALR	2.74E-127	0.602079227	0.955	0.78	4.39E-123	SCT 1
SLC39A8	0	0.601991608	0.542	0.126	0	SCT 2
PFN1	0	0.599999143	0.934	0.692	0	CTB cycling
ADAMTS1	0	0.599177318	0.389	0.043	0	CTB progenitor
CTSD	0	0.597554658	0.677	0.277	0	SCT 2
HMGB1	2.15E-103	0.594756303	0.693	0.374	3.45E-99	CTB progenitor
HSP90B1	9.35E-101	0.594629227	0.901	0.651	1.50E-96	SCT 1
DAB2	6.12E-115	0.594333908	0.844	0.529	9.82E-111	SCT 1
RPL22	0	0.593930973	0.96	0.76	0	CTB cycling
HEXIM1	2.04E-289	0.593518031	0.682	0.295	3.28E-285	SCT 2
RPS10	0	0.593202803	0.853	0.533	0	CTB cycling
EEF1B2	0	0.592487382	0.915	0.672	0	CTB cycling
DBI	0	0.59228212	0.814	0.502	0	CTB cycling
BNIP3L	5.50E-262	0.592149743	0.403	0.078	8.83E-258	SCT 1
MT-CO3	1.46E-69	0.591617455	1	1	2.35E-65	CTB progenitor
RPL35	0	0.591285484	0.995	0.932	0	CTB cycling
RPS16	0	0.589772723	0.993	0.885	0	CTB cycling
TNFRSF1B	0	0.589479123	0.534	0.131	0	SCT 2
RPN2	2.95E-264	0.587518919	0.761	0.397	4.73E-260	SCT 2
SLC16A3	1.04E-305	0.587429956	0.739	0.334	1.66E-301	SCT 2
MT-ND5	0	0.587164563	0.977	0.847	0	CTB 2
RAN	5.58E-115	0.586698335	0.885	0.615	8.95E-111	CTB progenitor
PDIA3	2.64E-116	0.586346312	0.883	0.611	4.24E-112	SCT 1
HSPA5	4.71E-99	0.586190282	0.871	0.612	7.55E-95	SCT 1
MACF1	0	0.585333374	0.484	0.049	0	CTB progenitor
SLC43A2	1.69E-245	0.585247082	0.771	0.409	2.72E-241	SCT 2
QSOX1	0	0.584945303	0.561	0.189	0	SCT 2
H3F3B	5.81E-110	0.583207015	0.888	0.581	9.32E-106	CTB progenitor
SQSTM1	1.31E-225	0.581368915	0.925	0.629	2.11E-221	SCT 2
PHACTR2	3.41E-292	0.581182679	0.536	0.186	5.47E-288	SCT 2
IER2	5.83E-57	0.579378244	0.517	0.317	9.34E-53	CTB progenitor
BSG	8.76E-131	0.579231224	0.929	0.538	1.40E-126	CTB progenitor
ANXA1	1.46E-98	0.578802361	0.94	0.826	2.34E-94	SCT 1
PRKCZ	1.56E-257	0.578612057	0.825	0.448	2.51E-253	SCT 2
TIMP2	0	0.578328414	0.878	0.532	0	SCT progenitor
GAPDH	0	0.577582903	0.997	0.941	0	CTB cycling
RPS29	0	0.577499065	0.965	0.804	0	CTB cycling
MT-ATP6	0	0.57630817	1	0.999	0	CTB 2
HSPD1	0	0.573695502	0.788	0.433	0	CTB cycling
SSR2	6.15E-251	0.57242807	0.775	0.425	9.86E-247	SCT 2
CASP4	0	0.571917379	0.567	0.161	0	SCT 2
MFAP5	0	0.571703693	0.581	0.191	0	SCT 2
SFPQ	6.70E-184	0.571140202	0.804	0.334	1.07E-179	CTB progenitor
SLC7A5	9.90E-122	0.570695043	0.697	0.359	1.59E-117	SCT 1
PSG3	0	0.570305511	0.887	0.522	0	SCT progenitor
DSC2	0	0.570024355	0.549	0.095	0	CTB progenitor
ITIH5	3.11E-256	0.569700822	0.538	0.122	4.98E-252	CTB progenitor
MT-ND3	0	0.569460033	1	1	0	CTB 2
EGFR	5.70E-229	0.56895812	0.649	0.309	9.14E-225	SCT 2
DPP4	1.01E-218	0.56838581	0.572	0.156	1.62E-214	CTB progenitor
SLC38A2	1.72E-286	0.568186315	0.615	0.242	2.76E-282	SCT 2
RPL9	0	0.567145486	0.991	0.888	0	CTB cycling
FTH1	0	0.565953727	0.985	0.879	0	CTB cycling
ITM2C	2.40E-222	0.565752711	0.601	0.167	3.85E-218	CTB progenitor
NGFRAP1	0	0.565296789	0.673	0.333	0	CTB cycling
CD320	1.13E-307	0.564530579	0.57	0.201	1.81E-303	SCT 2
HMGB2	2.55E-86	0.564125702	0.413	0.167	4.09E-82	CTB progenitor
GSTO1	0	0.564005089	0.605	0.244	0	CTB cycling
RPS28	0	0.563719643	1	0.986	0	CTB cycling
LDHB	6.13E-296	0.563654476	0.895	0.636	9.83E-292	CTB cycling
ARL6IP5	3.66E-174	0.563465491	0.673	0.25	5.87E-170	CTB progenitor
N4BP2L2	0	0.563253662	0.543	0.099	0	CTB progenitor
COLEC12	0	0.563052256	0.488	0.077	0	CTB progenitor
SEC11A	5.61E-178	0.561195466	0.783	0.32	9.00E-174	CTB progenitor
EEF1A1	0	0.560015235	1	0.999	0	CTB cycling
C10orf10	1.90E-157	0.559426194	0.492	0.194	3.05E-153	CTB 1
SLC39A1	2.77E-216	0.559192302	0.67	0.208	4.44E-212	CTB progenitor
KRT7	8.18E-106	0.558806395	0.924	0.608	1.31E-101	CTB progenitor
CD63	0	0.558547674	0.971	0.794	0	SCT progenitor
TXN	0	0.558395347	0.634	0.291	0	CTB cycling
COL4A2	0	0.558305723	0.47	0.046	0	CTB progenitor
CEBPB	3.15E-117	0.557941953	0.806	0.543	5.06E-113	CTB 1
ATP5J2	0	0.557654918	0.729	0.394	0	CTB cycling
LCMT1-AS2	1.51E-293	0.556297157	0.641	0.253	2.43E-289	SCT 2
PIM3	1.03E-283	0.556043603	0.692	0.305	1.65E-279	SCT 2
VWA1	1.62E-225	0.555746588	0.602	0.166	2.60E-221	CTB progenitor
PVRL3	0	0.555480657	0.525	0.124	0	SCT 2
SLC2A3	1.65E-116	0.554776632	0.374	0.126	2.65E-112	SCT 1
MT-CYB	0	0.554712017	1	0.999	0	CTB 2
SURF4	7.78E-273	0.55431815	0.658	0.29	1.25E-268	SCT 2
LYPD3	0	0.553629854	0.565	0.184	0	SCT 2
NOP56	2.22E-244	0.553502961	0.631	0.17	3.56E-240	CTB progenitor
FTL	5.52E-89	0.553277708	0.959	0.828	8.85E-85	SCT 1
TMEM106B	0	0.553026693	0.549	0.152	0	SCT 2
COX6A1	1.55E-151	0.55300662	0.845	0.421	2.49E-147	CTB progenitor
LAMA5	0	0.551360379	0.411	0.033	0	CTB progenitor
PEBP1	0	0.551293015	0.812	0.481	0	CTB cycling
BTF3	8.99E-279	0.550829935	0.859	0.594	1.44E-274	CTB cycling
STT3B	1.23E-293	0.550122528	0.602	0.229	1.97E-289	SCT 2
SIAH1	9.29E-180	0.548938194	0.523	0.198	1.49E-175	CTB 1
CD46	4.64E-152	0.547827019	0.782	0.343	7.44E-148	CTB progenitor
TUBA1B	3.34E-70	0.547183106	0.791	0.544	5.36E-66	CTB progenitor
RPL21	0	0.545596072	0.964	0.793	0	CTB cycling
HMGB1	0	0.54547432	0.66	0.318	0	CTB cycling
MYH10	2.57E-307	0.544986288	0.557	0.109	4.12E-303	CTB progenitor
MTRNR2L12	1.05E-227	0.544100256	0.88	0.719	1.68E-223	CTB 2
EIF4G2	2.87E-197	0.54401185	0.886	0.624	4.60E-193	SCT 2
C4orf3	1.02E-109	0.543362814	0.524	0.243	1.63E-105	SCT 1
LAMP1	3.00E-259	0.543353671	0.695	0.324	4.82E-255	SCT 2
TXNRD1	3.59E-269	0.543112372	0.554	0.208	5.75E-265	SCT 2
SCD	1.94E-95	0.542909148	0.716	0.438	3.12E-91	SCT 1
CD81	6.29E-225	0.542642912	0.621	0.174	1.01E-220	CTB progenitor
ATP5G3	5.64E-275	0.54256471	0.883	0.623	9.04E-271	CTB cycling
ATP6V0B	1.08E-240	0.542513346	0.724	0.37	1.73E-236	SCT 2
NRP2	0	0.542143574	0.44	0.035	0	CTB progenitor
TUFM	5.50E-177	0.542014675	0.782	0.317	8.82E-173	CTB progenitor
C2orf72	0	0.541583787	0.55	0.162	0	SCT 2
TBX3	2.54E-139	0.541269292	0.649	0.33	4.07E-135	CTB 1
GATA2	2.94E-239	0.54115537	0.643	0.297	4.72E-235	SCT 2
MAFF	0	0.541039822	0.559	0.176	0	SCT 2
PHOSPHO1	2.48E-269	0.540782008	0.426	0.098	3.97E-265	CTB 1
APMAP	5.80E-226	0.5403567	0.589	0.159	9.30E-222	CTB progenitor
RPL23A	0	0.540124126	0.985	0.88	0	CTB cycling
LUC7L3	4.82E-291	0.539317925	0.547	0.11	7.73E-287	CTB progenitor
PSG3	4.11E-80	0.538378008	0.863	0.595	6.58E-76	SCT 1
XBP1	0	0.537961343	0.59	0.209	0	SCT 2
DYNC1H1	4.77E-258	0.537382081	0.503	0.105	7.65E-254	CTB progenitor
PSG8	0	0.537322391	0.478	0.092	0	SCT 2
EZR	1.14E-169	0.536393377	0.863	0.618	1.83E-165	SCT 2
ATF3	1.36E-105	0.536292606	0.367	0.121	2.18E-101	CTB progenitor
RBM25	4.23E-283	0.534959356	0.599	0.133	6.78E-279	CTB progenitor
DNAJB9	0	0.533892798	0.538	0.159	0	SCT 2
HES1	5.04E-146	0.533778042	0.324	0.075	8.08E-142	CTB progenitor
DDX17	8.59E-154	0.533205496	0.757	0.322	1.38E-149	CTB progenitor
GPX1	1.45E-292	0.531608178	0.757	0.447	2.32E-288	CTB cycling
KATNBL1	5.05E-247	0.531303792	0.525	0.197	8.11E-243	SCT 2
JUND	1.55E-109	0.529915166	0.907	0.738	2.48E-105	CTB 1
CCSAP	1.01E-179	0.529625943	0.486	0.15	1.62E-175	SCT 1
PRRC2C	2.22E-183	0.529620821	0.8	0.309	3.55E-179	CTB progenitor
RPS21	0	0.529391044	0.961	0.781	0	CTB cycling
SLC20A1	6.04E-118	0.528948768	0.536	0.213	9.69E-114	CTB progenitor
HSPE1	1.17E-99	0.528482411	0.85	0.605	1.87E-95	CTB 1
TFPI2	1.36E-254	0.528206066	0.701	0.406	2.18E-250	SCT progenitor
HELLS	1.25E-253	0.527457087	0.483	0.098	2.01E-249	CTB progenitor
ACTB	9.19E-285	0.52703635	0.964	0.816	1.47E-280	CTB cycling
SNRPE	0	0.525100906	0.648	0.298	0	CTB cycling
SYPL1	7.69E-281	0.525075228	0.57	0.123	1.23E-276	CTB progenitor
MT-CO3	0	0.523786561	1	1	0	CTB 2
CYP19A1	0	0.521256113	0.913	0.583	0	SCT progenitor
ANXA4	1.08E-192	0.52114258	0.472	0.137	1.74E-188	SCT 1
CD24	5.44E-306	0.519518979	0.72	0.37	8.72E-302	CTB cycling
HINT1	3.15E-116	0.519234047	0.83	0.456	5.05E-112	CTB progenitor
TPT1	0	0.519113467	0.999	0.993	0	CTB cycling
ATP5L	9.80E-275	0.518495681	0.851	0.583	1.57E-270	CTB cycling
AKAP9	0	0.518158482	0.492	0.078	0	CTB progenitor
SLC25A6	6.00E-282	0.517960812	0.912	0.688	9.62E-278	CTB cycling
LAMB1	0	0.517221722	0.441	0.045	0	CTB progenitor
MARCKS	0	0.516744623	0.474	0.111	0	SCT 2
ENO1	2.98E-267	0.515555869	0.915	0.699	4.79E-263	CTB cycling
TAX1BP1	5.87E-267	0.514434314	0.545	0.2	9.41E-263	SCT 2
LGALS13	0	0.514342536	0.455	0.115	0	SCT 2
RPL7	4.07E-294	0.5138934	0.937	0.716	6.53E-290	CTB cycling
MFSD12	4.08E-103	0.513231812	0.736	0.42	6.55E-99	SCT 1
ATP1A1	1.01E-209	0.512046311	0.507	0.126	1.62E-205	CTB progenitor
IFI6	1.86E-65	0.51111195	0.92	0.664	2.98E-61	CTB progenitor
SNRPD1	0	0.511014368	0.646	0.314	0	CTB cycling
LYPD3	2.52E-129	0.5104922	0.523	0.211	4.05E-125	SCT 1
SLC26A2	5.86E-124	0.510089283	0.524	0.193	9.40E-120	CTB progenitor
LGALS16	2.69E-241	0.509483515	0.482	0.168	4.31E-237	SCT 2
SLC25A3	4.02E-265	0.509276892	0.889	0.652	6.45E-261	CTB cycling
RPL36AL	1.41E-297	0.509055275	0.761	0.443	2.26E-293	CTB cycling
HYOU1	4.80E-283	0.50901857	0.477	0.148	7.69E-279	SCT 2
CGB8	2.42E-112	0.508494117	0.612	0.292	3.88E-108	SCT 1
LY6E	8.38E-274	0.507708373	0.645	0.323	1.34E-269	CTB cycling
CD164	3.24E-104	0.507625568	0.667	0.363	5.19E-100	SCT 1
S100P	3.35E-97	0.506284393	0.898	0.615	5.37E-93	SCT 1
PRDX1	1.52E-116	0.505749675	0.956	0.856	2.43E-112	CTB 1
CRIM1	3.35E-164	0.505637965	0.554	0.178	5.37E-160	CTB progenitor
NPM1	4.66E-90	0.505201652	0.949	0.837	7.47E-86	CTB progenitor
NDUFA4	1.19E-258	0.505072807	0.722	0.415	1.91E-254	CTB cycling
FTH1	2.61E-63	0.50475341	0.969	0.895	4.18E-59	CTB 1
SIAH2	1.00E-143	0.504665853	0.593	0.28	1.61E-139	CTB 1
PRDX2	1.74E-264	0.504488431	0.788	0.493	2.79E-260	CTB cycling
KRT8	4.11E-92	0.504478051	0.979	0.925	6.58E-88	SCT 1
ATP6AP1	1.11E-283	0.504405413	0.579	0.214	1.78E-279	SCT 2
FADS1	4.67E-221	0.503646151	0.436	0.091	7.49E-217	CTB progenitor
MYDGF	1.48E-98	0.503524544	0.803	0.511	2.37E-94	SCT 1
RPL27A	3.12E-295	0.502090778	0.954	0.775	5.00E-291	CTB cycling
MT-CO1	0	0.501482546	1	1	0	CTB 2
RPS17	4.67E-278	0.500926502	0.881	0.601	7.49E-274	CTB cycling
ATP1B3	2.59E-129	0.50065932	0.747	0.343	4.16E-125	CTB progenitor
DNAJB11	3.51E-303	0.499854533	0.535	0.176	5.62E-299	SCT 2
ERP29	1.15E-116	0.499129038	0.845	0.444	1.84E-112	CTB progenitor
PGF	1.11E-284	0.497717092	0.857	0.572	1.78E-280	SCT progenitor
SNRPF	0	0.495604545	0.632	0.291	0	CTB cycling
SON	2.90E-214	0.495543789	0.664	0.197	4.65E-210	CTB progenitor
CTSA	1.22E-293	0.495421919	0.559	0.194	1.96E-289	SCT 2
KTN1	1.57E-224	0.494608914	0.542	0.133	2.52E-220	CTB progenitor
SLC25A5	2.16E-241	0.494407568	0.811	0.537	3.46E-237	CTB cycling
NDUFB9	6.41E-162	0.494144851	0.695	0.267	1.03E-157	CTB progenitor
AHNAK	6.42E-275	0.494022829	0.402	0.063	1.03E-270	CTB progenitor
SMAGP	0	0.493376703	0.527	0.192	0	CTB cycling
RPS23	1.79E-136	0.493346843	0.998	0.977	2.87E-132	CTB 1
TECR	8.57E-215	0.493232962	0.741	0.393	1.37E-210	SCT 2
RBM8A	3.07E-112	0.492582959	0.692	0.421	4.92E-108	CTB 1
SRSF4	4.64E-244	0.49246757	0.561	0.133	7.44E-240	CTB progenitor
PEG10	3.21E-256	0.491682383	0.997	0.958	5.16E-252	CTB cycling
CD46	1.03E-219	0.491628136	0.666	0.323	1.65E-215	SCT 2
FAM83D	0	0.491321205	0.327	0.032	0	SCT 1
CD9	0	0.48976037	0.461	0.124	0	SCT 2
MUC15	1.28E-112	0.489363995	0.491	0.202	2.05E-108	SCT 1
CHPT1	1.86E-262	0.487920946	0.527	0.111	2.98E-258	CTB progenitor
PTMA	3.36E-84	0.486793951	0.963	0.859	5.39E-80	CTB progenitor
TMA7	7.98E-252	0.486721987	0.808	0.528	1.28E-247	CTB cycling
RPL38	1.03E-260	0.486429363	0.907	0.682	1.65E-256	CTB cycling
CYB5A	5.22E-125	0.486018544	0.596	0.24	8.37E-121	CTB progenitor
NGFRAP1	4.06E-95	0.485240462	0.717	0.388	6.52E-91	CTB progenitor
CEBPB	3.39E-172	0.485157895	0.827	0.527	5.44E-168	SCT 2
CCNE1	1.28E-296	0.484888739	0.604	0.276	2.06E-292	CTB cycling
SERINC3	0	0.483561365	0.481	0.134	0	SCT 2
RPL4	1.21E-269	0.481349467	0.941	0.77	1.94E-265	CTB cycling
NT5E	0	0.481292005	0.432	0.083	0	SCT 2
UBE2B	6.43E-121	0.481257397	0.597	0.312	1.03E-116	CTB 1
HMGN1	9.74E-132	0.48121171	0.824	0.396	1.56E-127	CTB progenitor
UQCRH	4.04E-248	0.480286172	0.827	0.557	6.48E-244	CTB cycling
EIF3A	1.86E-157	0.480196933	0.788	0.329	2.98E-153	CTB progenitor
COX5A	4.63E-269	0.479991704	0.701	0.388	7.42E-265	CTB cycling
CD55	7.37E-268	0.479150727	0.549	0.198	1.18E-263	SCT 2
SNRPG	3.34E-235	0.4788667	0.785	0.505	5.36E-231	CTB cycling
SEC61A1	4.23E-213	0.478565304	0.598	0.274	6.78E-209	SCT 2
GOLGB1	3.59E-229	0.478343694	0.483	0.105	5.77E-225	CTB progenitor
XAGE3	5.87E-220	0.477826902	0.841	0.604	9.42E-216	CTB cycling
SSR1	3.89E-242	0.477537438	0.557	0.221	6.24E-238	SCT 2
PEG10	2.07E-95	0.477440311	0.994	0.965	3.32E-91	CTB progenitor
RCN1	6.21E-136	0.477439259	0.641	0.255	9.97E-132	CTB progenitor
REEP5	2.16E-203	0.477117958	0.631	0.309	3.46E-199	SCT 2
NACA	1.02E-246	0.477037201	0.956	0.809	1.64E-242	CTB cycling
PRELID1	8.34E-86	0.476413922	0.727	0.516	1.34E-81	CTB 1
CYB5A	0	0.476348793	0.504	0.193	0	CTB cycling
TBX3	3.81E-199	0.476162963	0.648	0.314	6.11E-195	SCT 2
CALM2	1.76E-93	0.476072724	0.696	0.37	2.83E-89	CTB progenitor
KDELR2	9.32E-186	0.475458613	0.712	0.396	1.49E-181	SCT 2
MT-ND4L	7.60E-225	0.475398496	0.986	0.889	1.22E-220	SCT progenitor
SERP1	6.92E-93	0.475242404	0.699	0.452	1.11E-88	CTB 1
TPT1	1.41E-133	0.475086747	1	0.994	2.25E-129	CTB 1
MT-CO2	0	0.474953802	1	1	0	CTB 2
ID3	4.04E-228	0.474678454	0.56	0.229	6.48E-224	SCT 2
VGLL1	1.21E-107	0.474342411	0.719	0.437	1.95E-103	CTB 1
POLR2L	2.56E-245	0.474302657	0.757	0.466	4.11E-241	CTB cycling
SNHG8	1.80E-153	0.473785889	0.63	0.229	2.89E-149	CTB progenitor
TIMP3	4.32E-100	0.473389998	0.614	0.281	6.93E-96	CTB progenitor
KRT8	2.76E-183	0.472637856	0.989	0.919	4.43E-179	SCT 2
SRSF3	2.68E-117	0.471619435	0.806	0.416	4.30E-113	CTB progenitor
ERH	2.79E-271	0.471609428	0.641	0.33	4.47E-267	CTB cycling
ATRX	2.62E-262	0.470675871	0.456	0.083	4.20E-258	CTB progenitor
VDAC1	1.57E-251	0.470674574	0.682	0.385	2.52E-247	CTB cycling
CBX4	1.01E-185	0.470435592	0.476	0.121	1.61E-181	CTB progenitor
ZNF703	1.24E-110	0.470277179	0.483	0.203	1.99E-106	SCT 1
PDLIM1	0	0.469835866	0.478	0.166	0	CTB cycling
CYP11A1	3.46E-85	0.469775256	0.86	0.595	5.55E-81	SCT 1
TMED9	4.44E-78	0.469769527	0.769	0.535	7.13E-74	SCT 1
OS9	1.11E-247	0.469753539	0.507	0.182	1.79E-243	SCT 2
RPL23	1.15E-241	0.469077553	0.867	0.616	1.85E-237	CTB cycling
MT-ND2	4.13E-267	0.468267419	0.998	0.97	6.63E-263	SCT progenitor
ATP10D	1.17E-279	0.467758438	0.443	0.128	1.88E-275	SCT 2
RPS8	1.20E-130	0.467190692	0.998	0.983	1.92E-126	CTB 1
DLG5	1.51E-151	0.46700478	0.567	0.194	2.41E-147	CTB progenitor
UBB	5.27E-241	0.466448781	0.81	0.528	8.46E-237	CTB cycling
ST3GAL4	1.15E-251	0.466266218	0.54	0.2	1.85E-247	SCT 2
NUPR1	8.13E-79	0.466165356	0.639	0.416	1.30E-74	CTB 1
RPL31	1.61E-276	0.466007216	0.666	0.352	2.58E-272	CTB cycling
EPCAM	1.08E-274	0.465915739	0.356	0.049	1.73E-270	CTB progenitor
GSTP1	9.39E-242	0.465552797	0.938	0.756	1.51E-237	CTB cycling
ATP6AP2	1.91E-154	0.46545053	0.566	0.189	3.07E-150	CTB progenitor
SNHG12	0	0.465237992	0.402	0.051	0	CTB progenitor
HSD17B1	4.50E-262	0.465206316	0.971	0.849	7.22E-258	SCT progenitor
ADAM12	2.74E-70	0.46454985	0.602	0.346	4.40E-66	SCT 1
HSPB1	1.62E-67	0.464528125	0.923	0.736	2.60E-63	SCT 1
ASB2	0	0.464462221	0.417	0.072	0	SCT 2
CTSB	1.05E-82	0.464186925	0.818	0.527	1.68E-78	SCT 1
LMO4	1.56E-185	0.464046509	0.495	0.13	2.50E-181	CTB progenitor
APRT	1.56E-271	0.463056095	0.584	0.28	2.50E-267	CTB cycling
ERVW-1	3.28E-78	0.462977886	0.735	0.468	5.26E-74	SCT 1
RPS4Y1	2.22E-236	0.462863044	0.796	0.519	3.56E-232	CTB cycling
SNX3	9.81E-256	0.462644284	0.595	0.3	1.57E-251	CTB cycling
MZT2B	1.01E-289	0.461033917	0.606	0.286	1.62E-285	CTB cycling
HIST1H1C	2.95E-266	0.46053614	0.492	0.162	4.73E-262	SCT 2
ASAH1	2.33E-239	0.460462757	0.507	0.186	3.74E-235	SCT 2
MT-ND1	6.09E-273	0.459828169	0.999	0.97	9.76E-269	SCT progenitor
ATP5G3	3.93E-75	0.459290757	0.865	0.668	6.31E-71	CTB progenitor
YIPF2	3.91E-257	0.458885855	0.514	0.181	6.26E-253	SCT 2
SLC5A3	6.72E-216	0.458209158	0.406	0.08	1.08E-211	CTB progenitor
NKTR	0	0.458018795	0.379	0.036	0	CTB progenitor
TGFBR3	0	0.457409292	0.402	0.094	0	SCT 2
VGLL1	1.24E-237	0.457311013	0.696	0.397	1.98E-233	CTB cycling
RTN4	4.42E-131	0.456556412	0.662	0.272	7.09E-127	CTB progenitor
ITM2B	3.73E-72	0.456176544	0.799	0.553	5.99E-68	SCT 1
SLC2A1	2.00E-60	0.455948491	0.781	0.497	3.20E-56	CTB progenitor
PRDX6	1.50E-153	0.455491802	0.826	0.563	2.40E-149	SCT 2
BMP7	3.74E-233	0.454839624	0.478	0.101	6.00E-229	CTB progenitor
ISYNA1	4.14E-108	0.454337154	0.843	0.453	6.64E-104	CTB progenitor
SLC7A2	6.40E-299	0.4540918	0.42	0.109	1.03E-294	SCT 2
HSP90AB1	3.29E-204	0.453221731	0.901	0.669	5.27E-200	CTB cycling
COX7C	3.41E-224	0.452864597	0.846	0.594	5.47E-220	CTB cycling
TOP1	6.99E-81	0.45274851	0.592	0.357	1.12E-76	CTB 1
LAMP2	1.57E-236	0.452606656	0.527	0.199	2.52E-232	SCT 2
ATP5E	1.05E-214	0.452020234	0.81	0.554	1.69E-210	CTB cycling
SLC16A3	4.17E-87	0.45160077	0.649	0.366	6.68E-83	SCT 1
HMGN1	2.18E-239	0.451049998	0.652	0.356	3.50E-235	CTB cycling
NEURL1	1.22E-265	0.450865267	0.485	0.158	1.96E-261	SCT 2
RPL37A	4.30E-238	0.450811675	0.937	0.748	6.89E-234	CTB cycling
GNS	3.35E-299	0.450586962	0.443	0.121	5.38E-295	SCT 2
FASN	4.17E-118	0.450409604	0.505	0.186	6.69E-114	CTB progenitor
RPL39	1.48E-112	0.450393376	0.995	0.965	2.38E-108	CTB 1
NR2F2	1.52E-244	0.449188508	0.389	0.065	2.45E-240	CTB progenitor
RPLP2	8.48E-306	0.449123525	0.992	0.936	1.36E-301	CTB cycling
TYMS	5.77E-255	0.44876746	0.466	0.189	9.25E-251	CTB cycling
HSP90AA1	7.83E-64	0.448438487	0.895	0.771	1.26E-59	CTB 1
SAT1	2.81E-82	0.447361806	0.992	0.966	4.50E-78	SCT 1
TM9SF2	6.54E-281	0.446687437	0.465	0.139	1.05E-276	SCT 2
ESAM	0	0.44652822	0.41	0.081	0	SCT 2
FBLN1	1.11E-226	0.446353631	0.925	0.79	1.79E-222	SCT progenitor
RCN2	6.30E-141	0.445878255	0.596	0.218	1.01E-136	CTB progenitor
DUSP9	9.60E-231	0.445794684	0.762	0.461	1.54E-226	CTB cycling
TPR	4.68E-186	0.445568795	0.534	0.147	7.50E-182	CTB progenitor
CEBPA	2.77E-175	0.445248087	0.589	0.29	4.45E-171	SCT 2
GOLGA4	1.17E-134	0.445243795	0.534	0.28	1.87E-130	SCT 2
HMGN3	2.30E-111	0.445080187	0.688	0.326	3.69E-107	CTB progenitor
NDUFS5	2.31E-217	0.445046803	0.807	0.546	3.71E-213	CTB cycling
MT-ND4	9.02E-271	0.444715091	1	0.991	1.45E-266	SCT progenitor
RPS19	3.47E-126	0.444299292	0.998	0.991	5.56E-122	CTB 1
LDHA	7.18E-221	0.444121682	0.73	0.433	1.15E-216	CTB cycling
GPRC5C	0	0.443918736	0.324	0.038	0	SCT 1
TOMM7	1.12E-282	0.443909425	0.574	0.261	1.80E-278	CTB cycling
ANXA1	1.38E-135	0.442871038	0.943	0.817	2.21E-131	SCT 2
MSMO1	1.95E-205	0.44272068	0.542	0.229	3.12E-201	SCT 2
SLC7A8	2.67E-184	0.442503758	0.504	0.214	4.28E-180	SCT 2
EZR	3.94E-57	0.442409285	0.813	0.637	6.32E-53	SCT 1
ZNF703	1.77E-228	0.442093372	0.498	0.181	2.83E-224	SCT 2
RANBP1	2.05E-90	0.441828323	0.772	0.426	3.29E-86	CTB progenitor
RYBP	3.37E-79	0.441200985	0.636	0.357	5.41E-75	SCT 1
C1orf115	1.77E-221	0.441052198	0.525	0.205	2.83E-217	SCT 2
MAP1LC3B	1.72E-216	0.441022987	0.56	0.235	2.76E-212	SCT 2
INSR	2.43E-249	0.440637639	0.402	0.117	3.90E-245	SCT 2
CPM	8.37E-288	0.44059345	0.398	0.101	1.34E-283	SCT 2
TCAF1	7.32E-69	0.440528068	0.573	0.362	1.17E-64	CTB 1
VIMP	2.53E-235	0.440044245	0.512	0.188	4.06E-231	SCT 2
RASA1	1.69E-159	0.439568764	0.619	0.331	2.71E-155	SCT 2
HMGN2	2.07E-176	0.43916443	0.672	0.424	3.32E-172	CTB cycling
STARD4	1.34E-231	0.438831477	0.495	0.182	2.15E-227	SCT 2
ANP32B	5.64E-116	0.437899644	0.709	0.327	9.04E-112	CTB progenitor
ALDOA	3.18E-217	0.437406487	0.888	0.647	5.10E-213	CTB cycling
NME1	3.15E-272	0.437049526	0.532	0.233	5.06E-268	CTB cycling
SLC3A2	4.35E-166	0.436574761	0.666	0.365	6.97E-162	SCT 2
MT-CYB	7.44E-35	0.43572327	1	0.999	1.19E-30	CTB progenitor
TCL1B	7.35E-262	0.434785081	0.417	0.119	1.18E-257	SCT 2
MT-ATP6	1.54E-288	0.433982151	1	0.999	2.48E-284	SCT progenitor
PRLR	7.93E-285	0.433505484	0.416	0.111	1.27E-280	SCT 2
GLDC	1.38E-210	0.43289053	0.418	0.086	2.21E-206	CTB progenitor
SSR3	2.60E-175	0.432625641	0.587	0.289	4.18E-171	SCT 2
HSP90AA1	3.00E-72	0.432020032	0.95	0.771	4.82E-68	CTB progenitor
ADGRG1	6.56E-149	0.431834395	0.432	0.121	1.05E-144	CTB progenitor
TMEM208	1.25E-238	0.43127236	0.5	0.181	2.00E-234	SCT 2
RPS15A	6.91E-93	0.430768047	0.987	0.917	1.11E-88	CTB 1
WEE1	6.24E-195	0.430315728	0.355	0.068	1.00E-190	CTB progenitor
PPP1CB	9.04E-154	0.430095151	0.824	0.528	1.45E-149	SCT 2
IMPA2	4.58E-186	0.430083848	0.589	0.277	7.34E-182	SCT 2
CREB3L2	6.28E-278	0.429604902	0.445	0.128	1.01E-273	SCT 2
OSMR	0	0.429560489	0.374	0.077	0	SCT 2
CPEB4	5.75E-287	0.429142443	0.4	0.102	9.22E-283	SCT 2
SIGLEC6	2.55E-175	0.428350238	0.38	0.096	4.09E-171	SCT 1
POLR2J3	0	0.428044356	0.346	0.017	0	CTB progenitor
HMG20B	1.76E-99	0.427472029	0.537	0.251	2.82E-95	SCT 1
TUBA1C	1.12E-205	0.427341321	0.617	0.346	1.79E-201	CTB cycling
ATP5I	8.18E-221	0.427089581	0.619	0.337	1.31E-216	CTB cycling
BZW2	7.85E-179	0.426765956	0.657	0.339	1.26E-174	SCT 2
CANX	1.77E-64	0.426571461	0.756	0.524	2.84E-60	SCT 1
KCNN4	1.25E-128	0.426380803	0.485	0.163	2.00E-124	CTB progenitor
CALD1	1.18E-184	0.426319445	0.469	0.117	1.89E-180	CTB progenitor
EGFR	4.13E-71	0.426249001	0.628	0.336	6.62E-67	CTB progenitor
ENPEP	8.68E-171	0.426163209	0.419	0.103	1.39E-166	CTB progenitor
MANF	7.37E-77	0.426092241	0.629	0.358	1.18E-72	SCT 1
UBALD2	3.29E-244	0.425967171	0.471	0.158	5.27E-240	SCT 2
MT-ND5	1.09E-197	0.425538703	0.959	0.846	1.74E-193	SCT progenitor
DEK	2.21E-131	0.425510898	0.525	0.182	3.55E-127	CTB progenitor
FAM89A	1.55E-134	0.425328089	0.557	0.198	2.48E-130	CTB progenitor
PSG7	2.66E-257	0.425003309	0.317	0.071	4.27E-253	SCT 2
SEC11C	5.99E-253	0.424874108	0.44	0.135	9.60E-249	SCT 2
GLUL	2.89E-194	0.424498421	0.631	0.369	4.64E-190	SCT progenitor
SET	4.28E-85	0.423972262	0.866	0.554	6.87E-81	CTB progenitor
KRT18	2.22E-77	0.423888208	0.99	0.978	3.57E-73	SCT 1
HSPB8	7.72E-73	0.423610168	0.782	0.525	1.24E-68	CTB 1
S100P	1.09E-184	0.423048259	0.811	0.576	1.75E-180	SCT progenitor
ZFAS1	1.61E-251	0.422754364	0.582	0.283	2.58E-247	CTB cycling
HSPB8	1.35E-65	0.422115614	0.786	0.529	2.16E-61	SCT 1
PRDX6	6.75E-58	0.421753232	0.765	0.584	1.08E-53	SCT 1
DBI	1.78E-71	0.421668852	0.82	0.554	2.86E-67	CTB progenitor
SDC1	6.21E-223	0.421415643	0.733	0.423	9.97E-219	SCT progenitor
ATP5G2	1.79E-214	0.421086039	0.622	0.346	2.87E-210	CTB cycling
LGALS3BP	5.88E-174	0.421028078	0.415	0.1	9.42E-170	CTB progenitor
CHPF	8.25E-196	0.420966986	0.528	0.223	1.32E-191	SCT 2
ZNF488	2.09E-229	0.42073859	0.352	0.076	3.34E-225	CTB 1
SSR4	2.62E-158	0.420303592	0.671	0.379	4.20E-154	SCT 2
OSTC	1.19E-147	0.420292136	0.655	0.374	1.91E-143	SCT 2
DUSP1	3.56E-102	0.419470638	0.282	0.075	5.71E-98	CTB progenitor
ERVV-1	1.60E-284	0.419257829	0.4	0.103	2.56E-280	SCT 2
TRMT112	1.77E-216	0.419255056	0.676	0.398	2.84E-212	CTB cycling
ALYREF	1.83E-94	0.418793475	0.55	0.3	2.94E-90	CTB 1
EIF3E	1.08E-225	0.418754333	0.667	0.377	1.74E-221	CTB cycling
COX6C	1.13E-64	0.41846236	0.793	0.622	1.81E-60	CTB 1
RBMS1	2.19E-186	0.417715315	0.519	0.223	3.52E-182	SCT 2
SOD1	9.27E-196	0.417417912	0.768	0.505	1.49E-191	CTB cycling
HM13	2.59E-215	0.416924264	0.535	0.215	4.15E-211	SCT 2
CKS2	4.34E-72	0.416650857	0.475	0.259	6.97E-68	CTB 1
HSD17B12	9.17E-204	0.416506653	0.436	0.095	1.47E-199	CTB progenitor
EIF5A	8.07E-199	0.416467492	0.779	0.523	1.29E-194	CTB cycling
RPLP1	8.34E-117	0.416034597	0.999	0.994	1.34E-112	CTB 1
MT-ND3	2.88E-263	0.41601328	1	1	4.62E-259	SCT progenitor
IGF2	4.98E-44	0.415696406	0.946	0.881	7.99E-40	SCT 1
NAP1L1	7.59E-120	0.415525077	0.775	0.356	1.22E-115	CTB progenitor
RPS3	6.11E-110	0.415479193	0.998	0.982	9.80E-106	CTB 1
YIPF6	4.86E-241	0.415174789	0.488	0.168	7.80E-237	SCT 2
ATP5C1	2.90E-208	0.414817607	0.597	0.327	4.65E-204	CTB cycling
FKBP11	1.49E-249	0.414074806	0.419	0.126	2.39E-245	SCT 2
MARVELD3	1.65E-292	0.413869635	0.355	0.045	2.65E-288	CTB progenitor
SQLE	2.11E-72	0.413715072	0.593	0.335	3.39E-68	SCT 1
MKI67	3.31E-176	0.413111654	0.266	0.042	5.30E-172	CTB progenitor
BTF3	1.34E-65	0.413028364	0.843	0.64	2.14E-61	CTB progenitor
SLC5A6	4.10E-206	0.412726701	0.491	0.191	6.58E-202	SCT 2
DUSP5	7.02E-58	0.412513284	0.729	0.503	1.13E-53	SCT 1
GPX3	1.04E-122	0.412476101	0.37	0.118	1.67E-118	SCT 1
TRAM1	1.78E-206	0.411705608	0.49	0.189	2.85E-202	SCT 2
SNRPD2	3.14E-225	0.411243623	0.612	0.331	5.03E-221	CTB cycling
FAM65B	8.04E-272	0.410899945	0.397	0.105	1.29E-267	SCT 2
RRBP1	1.77E-132	0.410632766	0.552	0.293	2.84E-128	SCT 2
SRSF3	6.26E-205	0.410207741	0.657	0.378	1.00E-200	CTB cycling
MT-CYB	3.98E-261	0.409733263	1	0.999	6.38E-257	SCT progenitor
AZIN1	8.56E-169	0.409472058	0.568	0.276	1.37E-164	SCT 2
PABPN1	6.35E-143	0.409130778	0.527	0.172	1.02E-138	CTB progenitor
LGALS16	1.20E-84	0.408991632	0.438	0.191	1.92E-80	SCT 1
GSTA4	2.44E-207	0.408970267	0.479	0.181	3.91E-203	SCT 2
ATP6V1E1	1.28E-91	0.408947935	0.572	0.317	2.05E-87	CTB 1
ANXA5	3.59E-169	0.408820318	0.822	0.61	5.75E-165	CTB cycling
PDIA4	1.55E-162	0.40863655	0.533	0.251	2.48E-158	SCT 2
RPL10	2.64E-99	0.408209406	0.996	0.982	4.23E-95	CTB 1
RPL22L1	2.42E-208	0.408154474	0.531	0.264	3.88E-204	CTB cycling
RPS18	1.44E-107	0.40814549	0.999	0.989	2.30E-103	CTB 1
LMAN1	1.40E-71	0.407989819	0.646	0.379	2.25E-67	SCT 1
ATP5C1	3.35E-91	0.407769524	0.705	0.366	5.38E-87	CTB progenitor
SNRPB	1.12E-215	0.406479424	0.609	0.328	1.80E-211	CTB cycling
IDI1	3.62E-170	0.406447069	0.56	0.267	5.80E-166	SCT 2
LIPG	7.10E-301	0.406439529	0.382	0.089	1.14E-296	SCT 2
EEF1D	1.16E-188	0.406351878	0.869	0.652	1.85E-184	CTB cycling
RPS27	6.44E-102	0.406253166	0.997	0.972	1.03E-97	CTB 1
SLC2A1	4.76E-127	0.40576887	0.761	0.477	7.64E-123	SCT 2
GABARAPL1	2.16E-185	0.405696626	0.509	0.217	3.46E-181	SCT 2
KIAA0040	5.10E-186	0.405627154	0.377	0.102	8.18E-182	CTB 1
TMEM2	3.33E-182	0.405119998	0.407	0.092	5.34E-178	CTB progenitor
RPS13	5.75E-96	0.405051173	0.991	0.952	9.21E-92	CTB 1
LDHA	2.03E-69	0.40495616	0.774	0.48	3.25E-65	CTB progenitor
GGH	4.24E-48	0.40454896	0.54	0.369	6.80E-44	CTB 1
CALR	1.67E-207	0.404315198	0.912	0.753	2.68E-203	SCT progenitor
PRDX5	2.30E-190	0.404300955	0.723	0.468	3.69E-186	CTB cycling
RDX	1.56E-207	0.404219794	0.453	0.162	2.50E-203	SCT 2
PPA1	5.37E-216	0.404120063	0.556	0.284	8.62E-212	CTB cycling
SERINC1	4.10E-276	0.403408546	0.401	0.105	6.58E-272	SCT 2
RPS12	2.42E-110	0.403242923	1	0.994	3.89E-106	CTB 1
IMPDH2	3.61E-231	0.402528319	0.577	0.29	5.78E-227	CTB cycling
DNAJA1	1.14E-82	0.402190835	0.583	0.346	1.82E-78	CTB 1
ATP5G1	2.36E-178	0.40183428	0.684	0.432	3.78E-174	CTB cycling
RPS29	3.63E-81	0.401641337	0.948	0.828	5.82E-77	CTB 1
UQCR10	1.73E-172	0.401564729	0.746	0.512	2.77E-168	CTB cycling
RPL26	1.28E-79	0.401420645	0.97	0.89	2.05E-75	CTB 1
RPS4X	1.51E-90	0.401073158	0.988	0.93	2.42E-86	CTB 1
STRA13	2.94E-251	0.400920127	0.497	0.213	4.72E-247	CTB cycling
SNHG7	1.64E-123	0.400913317	0.479	0.161	2.63E-119	CTB progenitor
FAU	1.55E-202	0.400834965	0.949	0.792	2.48E-198	CTB cycling
SRM	2.46E-224	0.400815197	0.503	0.233	3.95E-220	CTB cycling
FAM129B	1.21E-138	0.400079422	0.589	0.318	1.93E-134	SCT 2
DSG2	4.34E-193	0.399970516	0.407	0.087	6.96E-189	CTB progenitor
DDX5	1.09E-105	0.399542949	0.804	0.405	1.75E-101	CTB progenitor
TECR	3.64E-58	0.399429173	0.648	0.422	5.84E-54	SCT 1
SRSF10	9.82E-148	0.399328348	0.489	0.147	1.57E-143	CTB progenitor
COX20	3.26E-92	0.399020427	0.548	0.292	5.23E-88	CTB 1
COX5B	2.51E-194	0.39899188	0.681	0.418	4.03E-190	CTB cycling
HNRNPR	1.17E-123	0.398959416	0.608	0.237	1.88E-119	CTB progenitor
TAGLN2	6.38E-250	0.398761429	0.46	0.186	1.02E-245	CTB cycling
RPS2	2.98E-94	0.398374485	0.997	0.956	4.78E-90	CTB 1
ATP1B1	1.64E-270	0.398015009	0.369	0.091	2.64E-266	SCT 2
CEP85	3.03E-255	0.397882612	0.405	0.114	4.87E-251	SCT 2
YBX3	2.55E-110	0.397787887	0.588	0.242	4.10E-106	CTB progenitor
SPCS3	4.02E-71	0.397777825	0.573	0.321	6.45E-67	SCT 1
NDUFS6	4.51E-215	0.397769591	0.613	0.336	7.23E-211	CTB cycling
MT-ATP8	2.50E-116	0.397662393	0.704	0.541	4.00E-112	CTB 2
HNRNPD	1.25E-109	0.397624448	0.733	0.342	2.00E-105	CTB progenitor
HSPA8	4.15E-171	0.39759932	0.812	0.567	6.65E-167	CTB cycling
MTRNR2L12	3.11E-157	0.397143649	0.862	0.717	4.99E-153	SCT progenitor
OVOL1	1.75E-165	0.396831508	0.312	0.079	2.81E-161	CTB 1
LGMN	2.73E-292	0.396807586	0.407	0.102	4.38E-288	SCT 2
TNFRSF12A	3.46E-222	0.396748292	0.416	0.134	5.55E-218	SCT 2
RPL13A	6.68E-183	0.396714252	0.958	0.814	1.07E-178	CTB cycling
RPL15	2.97E-86	0.396480878	0.982	0.938	4.76E-82	CTB 1
PSG5	1.03E-60	0.396010942	0.647	0.385	1.65E-56	SCT 1
GRN	1.68E-175	0.395640857	0.509	0.221	2.69E-171	SCT 2
PHB2	6.58E-119	0.394357583	0.636	0.259	1.05E-114	CTB progenitor
GH2	4.28E-243	0.394154605	0.298	0.066	6.87E-239	SCT 2
SERBP1	1.56E-106	0.393545273	0.761	0.367	2.50E-102	CTB progenitor
ADAMTS19	5.49E-280	0.392871221	0.343	0.044	8.80E-276	CTB progenitor
TXN	3.55E-82	0.392786659	0.672	0.346	5.70E-78	CTB progenitor
C10orf95	1.22E-255	0.392767875	0.31	0.053	1.96E-251	CTB 1
EIF4A2	5.79E-109	0.392764825	0.598	0.25	9.28E-105	CTB progenitor
PSG2	4.86E-67	0.39235798	0.54	0.287	7.80E-63	SCT 1
SLC25A3	6.22E-74	0.392295133	0.938	0.689	9.98E-70	CTB progenitor
DDOST	1.21E-102	0.392057047	0.608	0.263	1.94E-98	CTB progenitor
CLN3	2.32E-156	0.391937492	0.577	0.293	3.72E-152	SCT 2
HMG20B	4.56E-169	0.391540612	0.52	0.234	7.31E-165	SCT 2
MIF	3.44E-63	0.391455331	0.853	0.701	5.51E-59	CTB 1
PFN1	2.47E-73	0.390821193	0.905	0.729	3.96E-69	CTB 1
B2M	4.44E-141	0.390624132	0.619	0.394	7.12E-137	CTB cycling
ERO1A	1.47E-130	0.390529107	0.299	0.078	2.35E-126	SCT 1
HNRNPA1	2.06E-73	0.389928621	0.95	0.739	3.31E-69	CTB progenitor
RER1	4.18E-171	0.389754984	0.555	0.26	6.70E-167	SCT 2
HNRNPU	1.02E-100	0.389703605	0.722	0.345	1.64E-96	CTB progenitor
ATAD1	1.88E-249	0.389063927	0.398	0.113	3.01E-245	SCT 2
RPS3A	6.57E-90	0.38888338	0.991	0.952	1.05E-85	CTB 1
PSG6	1.14E-59	0.388876734	0.606	0.355	1.84E-55	SCT 1
CSF3R	9.14E-191	0.388614234	0.458	0.175	1.47E-186	SCT 2
RHOBTB1	1.97E-199	0.388399415	0.446	0.161	3.16E-195	SCT 2
SCD	2.29E-121	0.388255149	0.691	0.423	3.67E-117	SCT 2
MRFAP1	2.71E-232	0.387537882	0.51	0.234	4.35E-228	CTB cycling
MRPL4	1.19E-231	0.387491446	0.491	0.219	1.90E-227	CTB cycling
COBLL1	3.81E-185	0.387026329	0.488	0.196	6.11E-181	SCT 2
NUS1	2.86E-212	0.387017472	0.45	0.158	4.58E-208	SCT 2
TMED3	1.79E-182	0.386804053	0.495	0.206	2.86E-178	SCT 2
RPL13	1.88E-105	0.386491394	0.998	0.989	3.02E-101	CTB 1
NAP1L1	1.83E-184	0.386367671	0.586	0.323	2.93E-180	CTB cycling
NEU1	5.53E-219	0.38636007	0.437	0.147	8.87E-215	SCT 2
ECM1	2.10E-301	0.385771601	0.344	0.072	3.37E-297	SCT 2
LMAN2	7.23E-164	0.385581701	0.602	0.302	1.16E-159	SCT 2
FOLR1	2.94E-231	0.385435317	0.414	0.128	4.72E-227	SCT 2
H3F3A	4.81E-169	0.384931982	0.761	0.511	7.71E-165	CTB cycling
HMGB2	4.05E-205	0.384630778	0.358	0.132	6.49E-201	CTB cycling
CGB5	1.47E-97	0.384137176	0.477	0.2	2.37E-93	SCT 1
LSM7	2.35E-198	0.383954284	0.626	0.356	3.77E-194	CTB cycling
FKBP2	6.67E-61	0.383798033	0.832	0.601	1.07E-56	SCT 1
SIL1	3.78E-185	0.383742716	0.479	0.192	6.07E-181	SCT 2
RPN1	7.89E-166	0.383654849	0.49	0.215	1.27E-161	SCT 2
RPS5	2.51E-82	0.383572951	0.977	0.885	4.02E-78	CTB 1
ATP5D	2.56E-177	0.383518354	0.699	0.442	4.10E-173	CTB cycling
ECHS1	1.24E-245	0.383397763	0.459	0.187	1.99E-241	CTB cycling
INSL4	7.32E-73	0.383263099	0.493	0.244	1.17E-68	SCT 1
GNAS	6.14E-69	0.383053989	0.91	0.762	9.85E-65	CTB 1
AES	5.86E-135	0.383014993	0.743	0.455	9.40E-131	SCT 2
RPL32	3.70E-95	0.382753015	0.998	0.984	5.94E-91	CTB 1
AC015849.16	5.86E-294	0.3825769	0.362	0.081	9.40E-290	SCT 2
UBXN4	3.47E-134	0.382569418	0.57	0.2	5.56E-130	CTB progenitor
LGALS14	7.80E-269	0.382265428	0.299	0.06	1.25E-264	SCT 2
KISS1	3.54E-24	0.382203737	0.889	0.772	5.67E-20	SCT 1
TMEM59	6.06E-178	0.38202297	0.48	0.197	9.72E-174	SCT 2
RPS14	3.21E-92	0.382021558	0.992	0.95	5.15E-88	CTB 1
RPS7	2.51E-65	0.381634335	0.97	0.939	4.03E-61	CTB progenitor
CYSTM1	1.44E-220	0.381329597	0.493	0.226	2.31E-216	CTB cycling
RPS27A	5.38E-98	0.380930663	0.995	0.97	8.63E-94	CTB 1
TYMS	1.51E-53	0.380918755	0.454	0.236	2.42E-49	CTB progenitor
SLC25A5	5.32E-64	0.380750035	0.784	0.578	8.53E-60	CTB 1
SRSF6	7.14E-159	0.380749236	0.432	0.112	1.15E-154	CTB progenitor
MTMR10	3.87E-229	0.380123198	0.374	0.107	6.21E-225	SCT 2
BRD4	1.38E-99	0.37950312	0.658	0.299	2.22E-95	CTB progenitor
EIF3K	1.02E-188	0.379485082	0.662	0.395	1.63E-184	CTB cycling
TINCR	1.24E-201	0.378361334	0.446	0.161	1.99E-197	SCT 2
CRH	1.34E-177	0.378307485	0.256	0.064	2.15E-173	SCT 2
CNPY2	2.05E-153	0.377753236	0.547	0.269	3.28E-149	SCT 2
PRSS8	8.40E-233	0.377629494	0.412	0.125	1.35E-228	SCT 2
SNX3	1.84E-83	0.377514146	0.675	0.345	2.94E-79	CTB progenitor
ALPL	2.07E-284	0.3774558	0.335	0.071	3.32E-280	SCT 2
UBE2S	6.40E-195	0.377429905	0.397	0.166	1.03E-190	CTB cycling
GCM1	1.60E-160	0.377320327	0.487	0.215	2.57E-156	SCT 2
RPL28	1.07E-97	0.377222505	0.996	0.974	1.71E-93	CTB 1
DUSP9	2.90E-62	0.377177281	0.724	0.508	4.65E-58	CTB 1
TDRP	2.42E-77	0.377062069	0.522	0.295	3.88E-73	CTB 1
RAB1A	2.13E-153	0.376864439	0.553	0.273	3.42E-149	SCT 2
PIM3	3.86E-76	0.376746945	0.577	0.334	6.18E-72	CTB 1
CYB5B	5.20E-236	0.376503783	0.465	0.196	8.34E-232	CTB cycling
MT-CO3	3.40E-248	0.376030738	1	1	5.45E-244	SCT progenitor
RPL30	1.84E-79	0.375974296	0.986	0.924	2.95E-75	CTB 1
PDXK	1.91E-161	0.37541614	0.494	0.219	3.06E-157	SCT 2
TUBB	2.48E-47	0.375249424	0.753	0.522	3.98E-43	CTB progenitor
FAU	6.58E-74	0.375214621	0.94	0.815	1.05E-69	CTB 1
CCSAP	5.73E-179	0.37514983	0.396	0.14	9.19E-175	SCT 2
PTP4A1	4.24E-81	0.374938478	0.494	0.262	6.81E-77	CTB 1
HSPA9	1.68E-104	0.374851195	0.65	0.286	2.69E-100	CTB progenitor
HNRNPA3	8.60E-94	0.37453417	0.77	0.397	1.38E-89	CTB progenitor
ANXA6	6.60E-226	0.374326338	0.371	0.107	1.06E-221	SCT 2
STMN1	9.40E-251	0.374294001	0.37	0.123	1.51E-246	CTB cycling
PGAM1	8.40E-174	0.374274818	0.684	0.43	1.35E-169	CTB cycling
NDUFB2	7.08E-184	0.373830246	0.633	0.373	1.14E-179	CTB cycling
SPARC	4.29E-157	0.373693854	0.451	0.19	6.88E-153	SCT 2
MSI2	2.66E-163	0.373553829	0.398	0.095	4.26E-159	CTB progenitor
RPL9	2.00E-87	0.373480619	0.984	0.903	3.21E-83	CTB 1
SKP2	5.12E-123	0.37338707	0.484	0.162	8.22E-119	CTB progenitor
TMBIM6	1.54E-57	0.372768161	0.826	0.618	2.48E-53	SCT 1
EBI3	1.82E-209	0.372539645	0.363	0.106	2.91E-205	SCT 2
PPA1	1.35E-91	0.372259189	0.67	0.323	2.16E-87	CTB progenitor
ACTG1	1.96E-196	0.372044531	0.987	0.926	3.14E-192	CTB cycling
FDX1	6.25E-176	0.371831695	0.794	0.544	1.00E-171	SCT progenitor
EDF1	2.25E-111	0.37124816	0.916	0.748	3.61E-107	SCT 2
KIF5B	1.58E-121	0.370569754	0.528	0.279	2.53E-117	SCT 2
PTEN	1.54E-192	0.370289842	0.432	0.157	2.46E-188	SCT 2
MRPL4	1.90E-102	0.36987393	0.607	0.258	3.04E-98	CTB progenitor
CD59	2.39E-60	0.369788084	0.76	0.498	3.84E-56	SCT 1
SLC3A2	1.17E-54	0.369738055	0.606	0.388	1.88E-50	SCT 1
LRPAP1	6.79E-84	0.369599308	0.594	0.28	1.09E-79	CTB progenitor
RPL18	1.27E-94	0.369572111	0.995	0.966	2.03E-90	CTB 1
DDX21	9.67E-103	0.369557031	0.57	0.234	1.55E-98	CTB progenitor
RPL35A	4.27E-71	0.369442705	0.958	0.838	6.85E-67	CTB 1
CGB2	7.77E-290	0.369387491	0.361	0.081	1.25E-285	SCT 2
CKS1B	5.32E-216	0.369181785	0.41	0.164	8.54E-212	CTB cycling
MGAT1	2.77E-205	0.369046415	0.418	0.142	4.44E-201	SCT 2
NCOA3	2.80E-107	0.368764107	0.551	0.314	4.50E-103	SCT 2
ARL6IP1	1.28E-96	0.368564688	0.426	0.154	2.05E-92	CTB progenitor
CNN3	3.27E-212	0.367722265	0.462	0.206	5.25E-208	CTB cycling
RPS28	1.18E-100	0.36753573	0.999	0.988	1.88E-96	CTB 1
ARL4A	5.75E-88	0.367001759	0.361	0.153	9.21E-84	CTB 1
CYC1	1.04E-102	0.366499107	0.626	0.272	1.67E-98	CTB progenitor
H1F0	2.60E-148	0.366443924	0.506	0.237	4.18E-144	SCT 2
HMGN2	4.11E-53	0.366294134	0.661	0.46	6.59E-49	CTB 1
MDH2	4.85E-182	0.366255033	0.562	0.311	7.77E-178	CTB cycling
EBP	2.34E-192	0.366138395	0.438	0.16	3.75E-188	SCT 2
DAB2	2.70E-172	0.365932874	0.755	0.483	4.33E-168	SCT progenitor
UBA52	2.35E-179	0.365697702	0.95	0.824	3.76E-175	CTB cycling
CCNDBP1	5.54E-74	0.364946638	0.448	0.234	8.88E-70	CTB 1
KYNU	5.04E-285	0.364857958	0.354	0.079	8.08E-281	SCT 2
GDF15	1.34E-63	0.364444487	0.986	0.86	2.14E-59	SCT 1
CACYBP	5.52E-203	0.364396995	0.506	0.245	8.86E-199	CTB cycling
CHCHD2	4.79E-56	0.364104459	0.787	0.613	7.69E-52	CTB 1
CGB7	7.30E-68	0.363988136	0.496	0.254	1.17E-63	SCT 1
CYB5R1	1.91E-224	0.363639325	0.396	0.12	3.07E-220	SCT 2
PGRMC2	2.95E-215	0.363448277	0.417	0.135	4.73E-211	SCT 2
SF3B1	1.94E-126	0.363417486	0.459	0.145	3.11E-122	CTB progenitor
ATP6V1G1	3.55E-122	0.363306204	0.699	0.433	5.69E-118	SCT 2
GLDN	1.46E-224	0.363201492	0.374	0.108	2.34E-220	SCT 2
SRSF9	7.23E-158	0.363075629	0.756	0.518	1.16E-153	CTB cycling
SREK1	3.86E-180	0.362820049	0.349	0.069	6.19E-176	CTB progenitor
HNRNPF	2.82E-166	0.362195569	0.527	0.293	4.53E-162	CTB cycling
SNRPD3	7.02E-197	0.361671785	0.52	0.261	1.13E-192	CTB cycling
PNP	6.00E-87	0.361518095	0.531	0.232	9.63E-83	CTB progenitor
PPIC	1.19E-121	0.361474298	0.399	0.118	1.90E-117	CTB progenitor
TM9SF3	7.42E-156	0.36147296	0.46	0.198	1.19E-151	SCT 2
MT-CO1	1.54E-245	0.361068624	1	1	2.47E-241	SCT progenitor
C9orf142	4.49E-109	0.361057088	0.452	0.157	7.21E-105	CTB progenitor
UQCRQ	6.00E-162	0.360992759	0.734	0.487	9.62E-158	CTB cycling
EIF3F	6.11E-160	0.360662416	0.627	0.392	9.80E-156	CTB cycling
TMED2	6.11E-131	0.36008579	0.566	0.304	9.79E-127	SCT 2
GSTO1	6.39E-54	0.359998323	0.548	0.308	1.02E-49	CTB progenitor
PAPOLA	3.30E-69	0.359978692	0.594	0.37	5.30E-65	CTB 1
CCT6A	6.93E-87	0.359444958	0.736	0.377	1.11E-82	CTB progenitor
CLTA	6.68E-61	0.359345495	0.789	0.602	1.07E-56	CTB 1
RPL41	7.38E-77	0.35920485	0.985	0.937	1.18E-72	CTB 1
BCLAF1	4.11E-125	0.359150764	0.465	0.149	6.59E-121	CTB progenitor
HSPA8	3.81E-56	0.359144794	0.854	0.606	6.10E-52	CTB progenitor
RPS21	6.84E-63	0.359093902	0.941	0.808	1.10E-58	CTB 1
RPL27	8.22E-67	0.358766153	0.942	0.815	1.32E-62	CTB 1
SAP18	3.62E-63	0.358766082	0.716	0.51	5.81E-59	CTB 1
TMSB10	9.83E-45	0.358516833	0.93	0.754	1.58E-40	CTB progenitor
RPS16	2.60E-81	0.358415916	0.977	0.902	4.17E-77	CTB 1
IFNGR1	6.44E-204	0.358193017	0.399	0.13	1.03E-199	SCT 2
SERBP1	9.31E-163	0.358057059	0.58	0.336	1.49E-158	CTB cycling
ST3GAL1	1.26E-296	0.358049888	0.315	0.06	2.01E-292	SCT 2
AAK1	3.64E-85	0.357903437	0.505	0.216	5.84E-81	CTB progenitor
NCOA3	6.42E-55	0.357870377	0.521	0.328	1.03E-50	CTB 1
RPS26	6.35E-60	0.357833355	0.907	0.761	1.02E-55	CTB 1
TIMP3	2.50E-44	0.357530355	0.472	0.286	4.00E-40	SCT 1
COX7B	2.52E-58	0.357426878	0.703	0.504	4.04E-54	CTB 1
ARID3A	6.61E-86	0.35723832	0.744	0.384	1.06E-81	CTB progenitor
SLC39A7	1.00E-166	0.356745312	0.445	0.18	1.60E-162	SCT 2
LIMA1	7.25E-196	0.356701606	0.334	0.059	1.16E-191	CTB progenitor
HPGD	1.72E-82	0.356673694	0.354	0.153	2.75E-78	CTB 1
ARG2	2.20E-177	0.356580415	0.309	0.073	3.53E-173	CTB 1
C19orf48	1.70E-215	0.356552254	0.445	0.189	2.72E-211	CTB cycling
UBB	3.00E-58	0.356498274	0.78	0.571	4.82E-54	CTB 1
HSPB1	2.09E-148	0.356320714	0.878	0.705	3.35E-144	SCT progenitor
SDC1	4.13E-61	0.356191034	0.755	0.481	6.63E-57	SCT 1
EEF1A1	1.60E-119	0.355985217	1	0.999	2.57E-115	CTB 1
DHCR7	2.64E-191	0.355922237	0.42	0.149	4.24E-187	SCT 2
TOMM20	1.85E-96	0.355899568	0.707	0.333	2.96E-92	CTB progenitor
ISYNA1	7.36E-63	0.355699747	0.678	0.456	1.18E-58	CTB 1
SHISA5	3.51E-110	0.355337979	0.523	0.194	5.63E-106	CTB progenitor
STOML2	1.84E-198	0.354389489	0.477	0.224	2.96E-194	CTB cycling
FKBP2	6.20E-125	0.354368238	0.75	0.573	9.95E-121	SCT progenitor
LSM4	9.15E-184	0.354063832	0.493	0.248	1.47E-179	CTB cycling
HSPA8	2.82E-55	0.353878436	0.79	0.604	4.52E-51	CTB 1
BCAP31	3.04E-129	0.35386337	0.568	0.306	4.88E-125	SCT 2
GOLGA4	1.84E-95	0.353659715	0.651	0.293	2.96E-91	CTB progenitor
DDX46	6.47E-155	0.353506962	0.399	0.098	1.04E-150	CTB progenitor
TCF25	2.00E-123	0.353261809	0.568	0.311	3.21E-119	SCT 2
CEBPA	5.72E-56	0.353125243	0.532	0.313	9.17E-52	SCT 1
HSP90AB1	4.40E-51	0.353038854	0.876	0.704	7.06E-47	CTB 1
LGALS3	4.53E-85	0.352993267	0.446	0.177	7.26E-81	CTB progenitor
KPNA6	6.89E-175	0.352990486	0.413	0.152	1.11E-170	SCT 2
COX8A	4.86E-159	0.352941001	0.666	0.424	7.79E-155	CTB cycling
SLC25A5	1.41E-54	0.352729796	0.811	0.583	2.26E-50	CTB progenitor
APLP2	1.15E-112	0.352485496	0.619	0.36	1.85E-108	SCT 2
ORMDL1	1.86E-129	0.352355839	0.422	0.124	2.98E-125	CTB progenitor
THUMPD3-AS1	3.55E-273	0.352197329	0.292	0.032	5.69E-269	CTB progenitor
SNHG8	1.12E-203	0.352169984	0.447	0.197	1.79E-199	CTB cycling
CHCHD10	1.31E-118	0.352044495	0.547	0.3	2.11E-114	SCT 2
WLS	1.27E-175	0.351990046	0.338	0.066	2.03E-171	CTB progenitor
CYBA	4.35E-46	0.351984314	0.786	0.528	6.98E-42	CTB progenitor
SLC25A6	5.49E-61	0.351405127	0.891	0.722	8.81E-57	CTB 1
DYNLL1	2.17E-141	0.351320962	0.757	0.52	3.48E-137	CTB cycling
C4orf26	7.98E-286	0.351311426	0.316	0.063	1.28E-281	SCT 2
GPX4	6.21E-141	0.351272431	0.788	0.574	9.95E-137	CTB cycling
XAGE2	9.04E-92	0.351250763	0.761	0.547	1.45E-87	SCT 2
ERGIC3	2.75E-143	0.351049503	0.521	0.253	4.42E-139	SCT 2
RPL18A	8.10E-84	0.351039535	0.997	0.976	1.30E-79	CTB 1
HNRNPF	4.77E-89	0.351035967	0.675	0.324	7.66E-85	CTB progenitor
CCNB1	1.43E-50	0.351000183	0.355	0.164	2.29E-46	CTB progenitor
MBD3	6.90E-74	0.350907029	0.556	0.324	1.11E-69	CTB 1
ATP5J	1.74E-160	0.350879512	0.656	0.414	2.79E-156	CTB cycling
SNRPE	1.68E-74	0.350503512	0.672	0.355	2.70E-70	CTB progenitor
SMCHD1	6.49E-145	0.349873317	0.399	0.103	1.04E-140	CTB progenitor
B4GALT1	9.74E-139	0.349701688	0.442	0.196	1.56E-134	SCT 2
PTGES3	5.05E-150	0.349615723	0.673	0.438	8.10E-146	CTB cycling
KANK1	2.35E-185	0.349536677	0.334	0.062	3.77E-181	CTB progenitor
MLLT1	2.22E-133	0.349332478	0.792	0.566	3.56E-129	CTB cycling
SSB	4.02E-98	0.349200669	0.533	0.214	6.45E-94	CTB progenitor
DYNLL1	5.91E-51	0.348998047	0.799	0.558	9.47E-47	CTB progenitor
ARL1	9.00E-170	0.348995	0.417	0.159	1.44E-165	SCT 2
MGST3	2.43E-115	0.348842552	0.794	0.608	3.89E-111	CTB cycling
PPP1R15B	1.06E-217	0.348749457	0.364	0.105	1.70E-213	SCT 2
SLC13A4	4.52E-74	0.348559698	0.393	0.191	7.25E-70	CTB 1
ESRRG	2.44E-93	0.348251476	0.38	0.159	3.91E-89	CTB 1
PDIA6	5.12E-48	0.348230129	0.685	0.476	8.21E-44	SCT 1
HNRNPAB	4.27E-79	0.348095329	0.564	0.266	6.84E-75	CTB progenitor
PCNA	6.34E-168	0.347829723	0.411	0.19	1.02E-163	CTB cycling
UQCR11	5.07E-168	0.347790567	0.523	0.284	8.14E-164	CTB cycling
SECISBP2L	8.96E-54	0.347752062	0.465	0.275	1.44E-49	CTB 1
RPL12	9.91E-73	0.347665057	0.986	0.936	1.59E-68	CTB 1
RPL29	4.27E-74	0.34730915	0.988	0.93	6.84E-70	CTB 1
RAB7A	7.01E-137	0.34709135	0.515	0.255	1.12E-132	SCT 2
DIO2	2.11E-176	0.346976819	0.29	0.056	3.38E-172	SCT 1
PRDX1	9.06E-155	0.346940959	0.955	0.84	1.45E-150	CTB cycling
AP2M1	5.17E-112	0.346492202	0.712	0.449	8.29E-108	SCT 2
ILF3	3.60E-86	0.346035059	0.485	0.2	5.77E-82	CTB progenitor
SQSTM1	1.52E-42	0.345843035	0.847	0.653	2.43E-38	SCT 1
LNPEP	3.65E-230	0.345726249	0.299	0.069	5.85E-226	SCT 2
RHOB	2.94E-48	0.345587361	0.367	0.177	4.71E-44	CTB progenitor
EEF1B2	8.98E-50	0.345452884	0.878	0.715	1.44E-45	CTB progenitor
PPIA	7.70E-54	0.345440327	0.924	0.761	1.23E-49	CTB progenitor
RPL5	8.08E-52	0.344981656	0.942	0.893	1.30E-47	CTB progenitor
COX6B1	1.97E-140	0.344818424	0.723	0.506	3.16E-136	CTB cycling
CYP1B1	2.02E-227	0.344803597	0.276	0.059	3.24E-223	SCT 2
LRPAP1	8.93E-130	0.34470619	0.522	0.264	1.43E-125	SCT 2
DAG1	6.93E-85	0.344662284	0.43	0.167	1.11E-80	CTB progenitor
CTSL	1.14E-48	0.344540786	0.76	0.542	1.83E-44	SCT 1
GATA3	1.50E-76	0.344077438	0.441	0.222	2.40E-72	CTB 1
ACTN1	1.49E-143	0.344018389	0.385	0.098	2.39E-139	CTB progenitor
LSM5	1.03E-235	0.343891202	0.389	0.141	1.65E-231	CTB cycling
SDCBP	3.22E-107	0.34339683	0.626	0.38	5.16E-103	SCT 2
MLEC	3.08E-144	0.343373945	0.455	0.2	4.94E-140	SCT 2
LDHB	2.98E-52	0.343271743	0.873	0.681	4.79E-48	CTB progenitor
TMED5	1.39E-171	0.343096737	0.382	0.136	2.23E-167	SCT 2
ATP5O	2.27E-156	0.342752758	0.574	0.338	3.63E-152	CTB cycling
PORCN	1.63E-294	0.342305125	0.3	0.054	2.62E-290	SCT 2
CHCHD2	7.93E-136	0.342078739	0.799	0.581	1.27E-131	CTB cycling
CKB	7.02E-83	0.341837355	0.347	0.147	1.13E-78	CTB 1
GNB2L1	1.60E-70	0.341798829	0.98	0.88	2.56E-66	CTB 1
HMGA1	1.82E-63	0.341681865	0.805	0.564	2.92E-59	CTB 1
HSBP1	1.12E-166	0.341544246	0.526	0.287	1.79E-162	CTB cycling
EHD1	8.15E-135	0.341467925	0.431	0.192	1.31E-130	SCT 2
ARF4	6.75E-118	0.341375715	0.595	0.34	1.08E-113	SCT 2
DUT	1.20E-190	0.341346623	0.408	0.174	1.93E-186	CTB cycling
RPL14	2.48E-74	0.341334898	0.983	0.927	3.98E-70	CTB 1
FAR2	2.04E-149	0.341251098	0.402	0.159	3.27E-145	SCT 2
PHB2	1.60E-190	0.340904714	0.475	0.226	2.57E-186	CTB cycling
VMP1	3.49E-117	0.340309102	0.353	0.098	5.60E-113	CTB progenitor
PPIA	3.70E-62	0.339867612	0.936	0.755	5.93E-58	CTB 1
SLIRP	4.30E-160	0.339466246	0.519	0.286	6.89E-156	CTB cycling
SLBP	3.52E-244	0.339237669	0.347	0.111	5.65E-240	CTB cycling
ARF1	7.71E-109	0.339004501	0.683	0.433	1.24E-104	SCT 2
FAM107B	5.29E-55	0.338946285	0.528	0.305	8.48E-51	SCT 1
TUSC3	1.54E-57	0.33864579	0.595	0.356	2.47E-53	SCT 1
GULP1	1.51E-193	0.338539846	0.366	0.115	2.42E-189	SCT 2
CCT3	1.25E-164	0.338363999	0.553	0.308	2.01E-160	CTB cycling
RPS15	8.11E-88	0.338290045	0.998	0.976	1.30E-83	CTB 1
SRP14	7.02E-136	0.337992609	0.736	0.514	1.13E-131	CTB cycling
METRNL	1.06E-216	0.337853186	0.355	0.101	1.70E-212	SCT 2
MESDC2	7.19E-50	0.337552883	0.558	0.344	1.15E-45	SCT 1
CTSB	2.16E-150	0.337428658	0.73	0.487	3.46E-146	SCT progenitor
GLRX	8.64E-58	0.337291808	0.64	0.384	1.39E-53	SCT 1
TIMM13	6.40E-156	0.33718914	0.577	0.338	1.03E-151	CTB cycling
MAFK	2.46E-163	0.33698353	0.393	0.146	3.94E-159	SCT 2
RPL19	7.62E-82	0.33667614	0.995	0.974	1.22E-77	CTB 1
EXPH5	3.76E-211	0.336566725	0.316	0.083	6.03E-207	SCT 2
FAM49A	5.37E-192	0.336525531	0.389	0.129	8.62E-188	SCT 2
BTF3	2.08E-54	0.336382812	0.825	0.635	3.34E-50	CTB 1
COMT	1.88E-124	0.335780715	0.78	0.569	3.01E-120	CTB cycling
RPL8	1.18E-91	0.335682837	0.995	0.98	1.89E-87	CTB 1
EEF2	5.39E-131	0.335619279	0.895	0.725	8.65E-127	CTB cycling
NFAT5	8.20E-93	0.335524955	0.363	0.12	1.31E-88	CTB progenitor
SUMO2	2.85E-139	0.335523828	0.682	0.459	4.57E-135	CTB cycling
RPS7	4.97E-65	0.335433073	0.984	0.937	7.98E-61	CTB 1
SET	1.05E-127	0.335219363	0.746	0.524	1.68E-123	CTB cycling
DUT	2.31E-60	0.3351159	0.446	0.211	3.71E-56	CTB progenitor
MRPS34	6.44E-184	0.335090581	0.476	0.23	1.03E-179	CTB cycling
CPVL	1.43E-96	0.334734403	0.363	0.117	2.29E-92	CTB progenitor
DST	9.24E-216	0.334580495	0.259	0.032	1.48E-211	CTB progenitor
GLA	2.44E-161	0.334455341	0.394	0.148	3.91E-157	SCT 2
MSX2	1.72E-166	0.334342536	0.507	0.266	2.76E-162	CTB cycling
KDELR1	2.23E-111	0.334304695	0.575	0.331	3.57E-107	SCT 2
UQCRB	1.06E-151	0.333987478	0.61	0.371	1.70E-147	CTB cycling
PDLIM2	4.95E-127	0.333861615	0.5	0.247	7.94E-123	SCT 2
UBC	4.04E-92	0.333688323	0.881	0.673	6.48E-88	SCT 2
UPP1	8.23E-163	0.333523379	0.388	0.143	1.32E-158	SCT 2
CTSD	8.80E-60	0.333496677	0.548	0.312	1.41E-55	SCT 1
M6PR	1.32E-106	0.333392746	0.405	0.131	2.12E-102	CTB progenitor
GNG5	4.39E-140	0.332351458	0.53	0.315	7.04E-136	CTB cycling
ATPIF1	4.39E-145	0.332236795	0.533	0.311	7.03E-141	CTB cycling
ZC3H11A	8.48E-130	0.331939494	0.376	0.156	1.36E-125	SCT 2
CCNB1	1.85E-191	0.331771164	0.343	0.128	2.97E-187	CTB cycling
RPS9	2.44E-67	0.33082371	0.967	0.874	3.91E-63	CTB 1
SAR1B	2.36E-197	0.330740251	0.372	0.117	3.79E-193	SCT 2
VGLL3	2.80E-52	0.330591569	0.639	0.389	4.49E-48	SCT 1
PFDN5	6.36E-139	0.330579348	0.808	0.592	1.02E-134	CTB cycling
C17orf89	5.53E-201	0.330529905	0.402	0.165	8.86E-197	CTB cycling
S100A6	2.70E-75	0.330496715	0.855	0.661	4.33E-71	SCT 2
CBWD5	0	0.33046581	0.275	0.022	0	CTB progenitor
NDUFAB1	4.09E-152	0.330450422	0.536	0.308	6.56E-148	CTB cycling
SLC1A5	1.46E-169	0.330425915	0.289	0.05	2.35E-165	CTB progenitor
SOX4	1.42E-129	0.330405618	0.254	0.05	2.27E-125	CTB progenitor
RHOC	7.23E-187	0.329996679	0.431	0.193	1.16E-182	CTB cycling
SUB1	6.94E-139	0.329903643	0.674	0.445	1.11E-134	CTB cycling
TKT	1.89E-57	0.329797066	0.888	0.608	3.03E-53	CTB progenitor
MBNL3	1.75E-37	0.329759752	0.628	0.467	2.81E-33	CTB 1
MT-CO2	3.46E-222	0.32975022	1	1	5.56E-218	SCT progenitor
SF1	1.99E-91	0.329534167	0.459	0.176	3.19E-87	CTB progenitor
HMGB3	3.89E-41	0.329451165	0.507	0.326	6.23E-37	SCT 1
GOLPH3	2.14E-161	0.329068321	0.398	0.15	3.43E-157	SCT 2
NASP	2.33E-147	0.328889889	0.518	0.291	3.73E-143	CTB cycling
SNRPD1	8.39E-73	0.328694604	0.696	0.367	1.35E-68	CTB progenitor
RPL11	1.56E-79	0.328621784	0.998	0.979	2.50E-75	CTB 1
PSG4	2.59E-58	0.328328582	0.585	0.332	4.16E-54	SCT 1
TMEM184B	6.41E-182	0.328241681	0.373	0.124	1.03E-177	SCT 2
CLIP1	5.29E-126	0.328024894	0.385	0.165	8.48E-122	SCT 2
PRPF38B	1.23E-192	0.327924004	0.316	0.053	1.98E-188	CTB progenitor
PGP	1.73E-81	0.327824836	0.531	0.234	2.78E-77	CTB progenitor
RPL7A	1.17E-69	0.327619183	0.994	0.968	1.87E-65	CTB 1
PDLIM1	1.55E-67	0.327428331	0.479	0.218	2.48E-63	CTB progenitor
AMD1	8.53E-129	0.327370634	0.459	0.214	1.37E-124	SCT 2
C14orf166	5.96E-168	0.327249171	0.483	0.248	9.56E-164	CTB cycling
SLC30A2	2.54E-221	0.327132719	0.316	0.079	4.07E-217	SCT 2
MT-ATP8	6.84E-89	0.327122092	0.683	0.54	1.10E-84	SCT progenitor
CD59	1.47E-122	0.327100649	0.675	0.464	2.36E-118	SCT progenitor
RPS24	1.89E-78	0.326914017	0.998	0.983	3.03E-74	CTB 1
LAPTM4A	3.03E-134	0.326904169	0.432	0.191	4.86E-130	SCT 2
CYCS	2.08E-137	0.326841042	0.552	0.329	3.34E-133	CTB cycling
VAMP8	6.79E-139	0.326820921	0.584	0.356	1.09E-134	CTB cycling
DNAJC3	3.67E-67	0.326765648	0.448	0.217	5.89E-63	SCT 1
MPZL1	3.83E-154	0.326565657	0.376	0.14	6.15E-150	SCT 2
NUFIP2	2.99E-109	0.326417324	0.475	0.245	4.79E-105	SCT 2
LDLR	2.00E-142	0.32630742	0.381	0.151	3.21E-138	SCT 2
RAB11A	2.24E-55	0.326270712	0.552	0.353	3.59E-51	CTB 1
PRSS8	6.81E-82	0.326171228	0.369	0.147	1.09E-77	SCT 1
ANKRD11	2.86E-131	0.326151003	0.341	0.084	4.58E-127	CTB progenitor
CDV3	3.39E-92	0.325842396	0.51	0.204	5.43E-88	CTB progenitor
RPL34	2.31E-67	0.325828319	0.98	0.928	3.70E-63	CTB 1
RPL3	1.34E-73	0.325753526	0.991	0.955	2.15E-69	CTB 1
ENY2	1.40E-169	0.325701603	0.458	0.225	2.25E-165	CTB cycling
RPL23A	1.83E-64	0.325338573	0.972	0.897	2.93E-60	CTB 1
CD9	2.56E-75	0.325319094	0.368	0.153	4.11E-71	SCT 1
PARK7	5.32E-137	0.325155001	0.63	0.407	8.53E-133	CTB cycling
POLR1D	2.64E-189	0.325124407	0.402	0.171	4.24E-185	CTB cycling
NFYB	8.66E-89	0.325042537	0.292	0.106	1.39E-84	CTB 1
SIAH2	8.05E-55	0.324851444	0.54	0.292	1.29E-50	CTB progenitor
DAD1	5.39E-110	0.324699521	0.516	0.28	8.64E-106	SCT 2
PA2G4	2.55E-155	0.324592155	0.523	0.287	4.08E-151	CTB cycling
PSAP	1.78E-80	0.324447788	0.634	0.417	2.85E-76	SCT 2
ARPC5	2.73E-86	0.324173404	0.52	0.218	4.38E-82	CTB progenitor
TPI1	6.17E-123	0.324005205	0.799	0.582	9.90E-119	CTB cycling
MED13	1.40E-69	0.323778417	0.412	0.206	2.24E-65	CTB 1
SPCS2	1.81E-109	0.323672871	0.513	0.276	2.90E-105	SCT 2
ANO6	4.35E-125	0.323571056	0.329	0.082	6.98E-121	CTB progenitor
PRDX3	3.76E-178	0.323188561	0.414	0.186	6.03E-174	CTB cycling
RPL6	2.26E-60	0.322963415	0.974	0.897	3.62E-56	CTB 1
RPLP0	7.76E-68	0.322922922	0.984	0.894	1.24E-63	CTB 1
TMED10	6.39E-46	0.322792236	0.536	0.332	1.03E-41	SCT 1
SLBP	6.11E-78	0.322605342	0.389	0.148	9.79E-74	CTB progenitor
INSIG1	7.90E-44	0.32215752	0.648	0.44	1.27E-39	SCT 1
ARL5A	1.24E-129	0.322043332	0.448	0.204	1.99E-125	SCT 2
LDHB	4.74E-46	0.322034092	0.847	0.677	7.60E-42	CTB 1
PRPF4B	1.96E-123	0.32197263	0.357	0.095	3.14E-119	CTB progenitor
POMP	6.38E-36	0.321948565	0.75	0.612	1.02E-31	SCT 1
EIF5A	1.69E-49	0.321432908	0.755	0.562	2.72E-45	CTB 1
PNP	1.64E-172	0.321423924	0.429	0.199	2.63E-168	CTB cycling
ANP32B	3.22E-158	0.321386665	0.54	0.296	5.17E-154	CTB cycling
VDAC1	7.09E-69	0.321240714	0.756	0.431	1.14E-64	CTB progenitor
TGFB1	3.48E-59	0.321226999	0.524	0.285	5.58E-55	SCT 1
FNDC3A	5.42E-220	0.321178586	0.295	0.07	8.69E-216	SCT 2
MINOS1	1.61E-175	0.321080828	0.445	0.211	2.58E-171	CTB cycling
CAST	3.30E-98	0.321024519	0.391	0.191	5.30E-94	SCT 2
DCXR	9.91E-168	0.320683533	0.434	0.207	1.59E-163	CTB cycling
SECISBP2L	5.63E-96	0.320665812	0.483	0.263	9.02E-92	SCT 2
EGFR	3.12E-41	0.320629991	0.534	0.339	5.01E-37	SCT 1
RHOD	9.46E-206	0.320623689	0.342	0.097	1.52E-201	SCT 2
GADD45GIP1	2.69E-153	0.320447661	0.504	0.276	4.32E-149	CTB cycling
LGALS3	2.41E-192	0.32039749	0.368	0.144	3.86E-188	CTB cycling
COX4I1	1.26E-121	0.320158375	0.811	0.62	2.02E-117	CTB cycling
RPLP2	2.39E-71	0.320126268	0.984	0.945	3.84E-67	CTB 1
RPL37	1.56E-64	0.320023059	0.974	0.919	2.49E-60	CTB 1
CCT2	1.82E-73	0.31988582	0.553	0.262	2.92E-69	CTB progenitor
NUTF2	5.05E-146	0.319741514	0.494	0.274	8.10E-142	CTB cycling
PITPNA	9.18E-128	0.319705755	0.438	0.199	1.47E-123	SCT 2
DCP2	2.46E-127	0.319633976	0.422	0.189	3.95E-123	SCT 2
SSR2	6.75E-43	0.319547472	0.649	0.457	1.08E-38	SCT 1
PLEKHB2	9.63E-159	0.319459435	0.386	0.143	1.54E-154	SCT 2
FAR2	4.34E-68	0.319250987	0.365	0.174	6.97E-64	CTB 1
COTL1	1.51E-51	0.319108419	0.513	0.299	2.41E-47	SCT 1
BCAR4	6.23E-239	0.319014001	0.308	0.071	1.00E-234	SCT 2
RPS6	1.78E-67	0.318784549	0.991	0.949	2.85E-63	CTB 1
ACSS1	1.00E-56	0.318750448	0.502	0.259	1.61E-52	CTB progenitor
SSR1	4.76E-59	0.318494427	0.469	0.249	7.64E-55	SCT 1
C11orf31	2.07E-189	0.318432635	0.402	0.17	3.32E-185	CTB cycling
ARPC2	2.03E-64	0.317922339	0.775	0.46	3.25E-60	CTB progenitor
GGH	3.88E-23	0.317793429	0.524	0.375	6.23E-19	CTB progenitor
APEX1	6.05E-204	0.31756091	0.368	0.14	9.70E-200	CTB cycling
RPS25	2.01E-52	0.316848363	0.929	0.802	3.22E-48	CTB 1
PDLIM2	1.98E-57	0.316711599	0.486	0.265	3.18E-53	SCT 1
TUBA1C	7.56E-49	0.316691143	0.644	0.39	1.21E-44	CTB progenitor
GLG1	2.85E-128	0.316473205	0.331	0.082	4.57E-124	CTB progenitor
EIF3L	2.43E-144	0.31642788	0.557	0.328	3.90E-140	CTB cycling
CLIC3	5.59E-129	0.316373667	0.705	0.484	8.97E-125	SCT progenitor
SCARB2	4.73E-170	0.31629555	0.355	0.119	7.59E-166	SCT 2
ZFP36L1	8.78E-53	0.315591163	0.432	0.248	1.41E-48	CTB 1
LRRC59	3.44E-108	0.315188628	0.494	0.262	5.52E-104	SCT 2
RHOB	8.50E-72	0.314721789	0.366	0.172	1.36E-67	CTB 1
ATP5G3	2.54E-44	0.314454576	0.827	0.665	4.07E-40	CTB 1
SYDE1	7.58E-137	0.314174527	0.298	0.073	1.22E-132	SCT 1
TPP1	9.86E-211	0.313904466	0.307	0.078	1.58E-206	SCT 2
LRPPRC	7.34E-76	0.313864894	0.509	0.224	1.18E-71	CTB progenitor
CCDC47	5.69E-77	0.313678652	0.438	0.178	9.13E-73	CTB progenitor
P4HB	8.06E-44	0.313440984	0.813	0.613	1.29E-39	SCT 1
EIF4G2	7.06E-43	0.31334606	0.8	0.645	1.13E-38	CTB 1
EIF3G	1.73E-130	0.313265062	0.633	0.412	2.77E-126	CTB cycling
CTNNB1	2.68E-61	0.312865309	0.496	0.243	4.30E-57	CTB progenitor
RPSA	5.69E-55	0.312570211	0.966	0.833	9.13E-51	CTB 1
RAB31	1.32E-140	0.312427369	0.368	0.143	2.12E-136	SCT 2
TIMM8B	7.50E-157	0.312399111	0.441	0.219	1.20E-152	CTB cycling
PHB	6.24E-161	0.311831884	0.472	0.24	1.00E-156	CTB cycling
H2AFZ	3.70E-111	0.311754534	0.855	0.673	5.94E-107	CTB cycling
NUDC	1.15E-162	0.311750248	0.436	0.21	1.85E-158	CTB cycling
EIF4H	6.45E-45	0.311537774	0.55	0.356	1.03E-40	SCT 1
PTGES	3.13E-82	0.311385951	0.422	0.162	5.01E-78	CTB progenitor
PSMC4	1.61E-64	0.311372266	0.422	0.223	2.58E-60	CTB 1
ARPC1B	9.57E-141	0.311222182	0.558	0.33	1.54E-136	CTB cycling
EIF4G1	1.01E-81	0.311064902	0.519	0.316	1.63E-77	SCT 2
SRP9	2.92E-157	0.31062793	0.471	0.243	4.68E-153	CTB cycling
ARPC2	3.34E-117	0.310471605	0.641	0.433	5.35E-113	CTB cycling
RPL27A	7.56E-53	0.310426176	0.938	0.802	1.21E-48	CTB 1
SMC3	1.78E-115	0.310346271	0.37	0.105	2.85E-111	CTB progenitor
FTL	1.98E-128	0.310230629	0.912	0.812	3.18E-124	SCT progenitor
RBMX	3.48E-105	0.309740703	0.393	0.124	5.58E-101	CTB progenitor
KHK	1.60E-172	0.309394536	0.322	0.099	2.56E-168	SCT 2
FOXO4	4.02E-46	0.309239618	0.484	0.309	6.44E-42	CTB 1
YWHAH	1.34E-231	0.309197223	0.313	0.094	2.14E-227	CTB cycling
SLC22A11	5.81E-62	0.308879753	0.405	0.193	9.31E-58	SCT 1
SNHG7	4.39E-183	0.308833641	0.345	0.133	7.04E-179	CTB cycling
RHOBTB1	4.73E-65	0.308759077	0.396	0.183	7.59E-61	SCT 1
RAB2A	5.10E-126	0.308531183	0.423	0.19	8.18E-122	SCT 2
MOB4	5.35E-84	0.308490564	0.367	0.159	8.58E-80	CTB 1
NASP	1.75E-69	0.30846234	0.633	0.322	2.80E-65	CTB progenitor
CLDN7	8.34E-113	0.308405764	0.517	0.272	1.34E-108	SCT 2
APP	6.78E-98	0.308306618	0.49	0.267	1.09E-93	SCT 2
KDELR2	2.61E-43	0.308164811	0.625	0.423	4.19E-39	SCT 1
RPL10A	2.29E-51	0.30799721	0.939	0.802	3.68E-47	CTB 1
ALYREF	5.81E-151	0.30797169	0.503	0.271	9.32E-147	CTB cycling
RPL5	1.46E-55	0.307800226	0.972	0.888	2.34E-51	CTB 1
VGLL3	3.00E-133	0.307787714	0.584	0.347	4.81E-129	SCT progenitor
RPL24	7.21E-57	0.307577823	0.966	0.88	1.16E-52	CTB 1
SLC6A6	5.48E-198	0.307400861	0.295	0.076	8.79E-194	SCT 2
CARHSP1	1.14E-89	0.30709033	0.545	0.327	1.83E-85	SCT 2
UBC	2.95E-44	0.306981275	0.852	0.686	4.73E-40	CTB 1
GPC3	1.71E-62	0.306766017	0.474	0.24	2.74E-58	SCT 1
SSBP1	3.48E-144	0.306626674	0.48	0.26	5.58E-140	CTB cycling
PAGE4	5.49E-45	0.306591967	0.985	0.948	8.81E-41	CTB progenitor
RAI14	1.26E-178	0.306557321	0.313	0.092	2.02E-174	SCT 2
CFL1	5.81E-51	0.306449646	0.891	0.772	9.32E-47	CTB 1
NPB	1.79E-28	0.30642682	0.429	0.291	2.87E-24	CTB 1
RPN2	6.09E-44	0.306294783	0.639	0.429	9.76E-40	SCT 1
DNAJB9	6.59E-59	0.306285147	0.397	0.193	1.06E-54	SCT 1
QPRT	2.05E-96	0.306267259	0.639	0.398	3.28E-92	SCT 2
MED13	1.80E-110	0.305994004	0.416	0.195	2.88E-106	SCT 2
GGCT	5.85E-166	0.305886159	0.417	0.193	9.39E-162	CTB cycling
FNBP4	1.09E-171	0.305734874	0.295	0.051	1.74E-167	CTB progenitor
HNRNPH3	1.85E-89	0.305630926	0.453	0.172	2.97E-85	CTB progenitor
KPNB1	7.79E-69	0.305325793	0.542	0.26	1.25E-64	CTB progenitor
RPL38	9.58E-48	0.305186717	0.874	0.718	1.54E-43	CTB 1
2001-03-01	1.85E-114	0.305171357	0.327	0.086	2.97E-110	CTB progenitor
COX5A	1.48E-58	0.305015187	0.733	0.439	2.37E-54	CTB progenitor
H2AFZ	2.49E-28	0.304978326	0.846	0.704	4.00E-24	CTB progenitor
TRAM1	1.69E-58	0.304873663	0.422	0.213	2.71E-54	SCT 1
YIPF3	6.27E-151	0.304781882	0.368	0.137	1.01E-146	SCT 2
RPL21	2.04E-54	0.304668482	0.947	0.819	3.27E-50	CTB 1
APEX1	2.62E-84	0.304423929	0.447	0.174	4.20E-80	CTB progenitor
PRELID1	3.06E-120	0.304345844	0.708	0.486	4.90E-116	CTB cycling
SURF4	3.13E-51	0.304327305	0.541	0.322	5.02E-47	SCT 1
RPL36	6.24E-61	0.304249979	0.989	0.933	1.00E-56	CTB 1
SRRM1	2.47E-72	0.304217826	0.489	0.216	3.96E-68	CTB progenitor
DUSP4	3.34E-217	0.304148054	0.294	0.07	5.36E-213	SCT 2
PSG5	3.41E-145	0.30404044	0.59	0.341	5.47E-141	SCT progenitor
GYLTL1B	4.45E-143	0.304031616	0.308	0.065	7.13E-139	CTB progenitor
PABPC4	1.92E-83	0.304018273	0.512	0.215	3.08E-79	CTB progenitor
NFKBIA	2.38E-73	0.303888545	0.367	0.169	3.81E-69	CTB 1
MGST1	1.16E-54	0.303676736	0.348	0.151	1.86E-50	CTB progenitor
EDEM1	4.47E-151	0.303598845	0.339	0.119	7.17E-147	SCT 2
GNA12	1.31E-82	0.303482914	0.347	0.146	2.09E-78	CTB 1
PRMT1	1.39E-154	0.303463057	0.436	0.215	2.22E-150	CTB cycling
SPCS1	2.18E-66	0.303309059	0.549	0.267	3.49E-62	CTB progenitor
CLDN7	2.92E-57	0.303080961	0.55	0.289	4.68E-53	CTB progenitor
PRPF40A	1.26E-93	0.303075077	0.464	0.173	2.02E-89	CTB progenitor
RPS11	3.84E-127	0.302949583	0.945	0.814	6.16E-123	CTB cycling
MRPL27	4.82E-142	0.302841692	0.484	0.264	7.72E-138	CTB cycling
AGL	2.61E-121	0.30265792	0.33	0.084	4.19E-117	CTB progenitor
SELK	3.95E-79	0.302627818	0.369	0.164	6.33E-75	CTB 1
PA2G4	1.50E-59	0.302500521	0.601	0.322	2.40E-55	CTB progenitor
RPL22	1.15E-51	0.302321485	0.934	0.791	1.85E-47	CTB 1
PARP1	9.79E-94	0.302274708	0.436	0.156	1.57E-89	CTB progenitor
SRSF9	1.08E-49	0.302174179	0.747	0.553	1.74E-45	CTB 1
KIAA0101	4.21E-184	0.302116291	0.317	0.115	6.76E-180	CTB cycling
LAMP2	9.22E-54	0.301845658	0.43	0.227	1.48E-49	SCT 1
H3F3A	5.38E-50	0.30183045	0.796	0.551	8.63E-46	CTB progenitor
GPNMB	3.45E-65	0.30182318	0.388	0.176	5.54E-61	SCT 1
MEST	5.90E-135	0.301820071	0.528	0.298	9.45E-131	CTB cycling
ZFP36L1	8.49E-47	0.301695125	0.469	0.251	1.36E-42	CTB progenitor
PAGE4	6.02E-52	0.301499081	0.995	0.946	9.65E-48	CTB 1
WBP2	1.67E-164	0.301493693	0.344	0.115	2.67E-160	SCT 2
CYC1	1.63E-147	0.301404048	0.464	0.244	2.61E-143	CTB cycling
STS	8.91E-55	0.30107993	0.552	0.315	1.43E-50	SCT 1
PSAP	1.24E-32	0.300977683	0.656	0.432	1.98E-28	CTB progenitor
PVRL4	6.64E-106	0.300947507	0.267	0.073	1.07E-101	SCT 1
DSC3	2.55E-197	0.300919664	0.25	0.032	4.09E-193	CTB progenitor
L1TD1	2.80E-161	0.30078675	0.257	0.042	4.50E-157	CTB progenitor
REEP5	1.39E-39	0.300494408	0.521	0.337	2.24E-35	SCT 1
IARS2	5.52E-122	0.300284447	0.32	0.079	8.85E-118	CTB progenitor
SELT	4.82E-53	0.300012486	0.44	0.255	7.72E-49	CTB 1
SNRPB	1.40E-59	0.300005304	0.593	0.369	2.24E-55	CTB 1
RNF11	6.06E-166	0.299891906	0.336	0.109	9.71E-162	SCT 2
CYCS	1.39E-49	0.299887529	0.551	0.361	2.23E-45	CTB 1
COBLL1	2.84E-50	0.299731688	0.393	0.219	4.55E-46	CTB 1
HSPB1	2.77E-37	0.299496299	0.896	0.735	4.44E-33	CTB 1
NCL	5.08E-94	0.299239335	0.714	0.514	8.15E-90	CTB cycling
HSPD1	3.75E-52	0.299022136	0.727	0.489	6.01E-48	CTB 1
KHDRBS1	9.41E-81	0.299005307	0.511	0.217	1.51E-76	CTB progenitor
YWHAQ	4.68E-150	0.298898527	0.416	0.203	7.51E-146	CTB cycling
UQCC2	2.27E-161	0.298335501	0.408	0.19	3.64E-157	CTB cycling
WBP5	1.63E-123	0.298165931	0.515	0.307	2.61E-119	CTB cycling
MRPL51	6.65E-140	0.298114725	0.46	0.247	1.07E-135	CTB cycling
DEPDC1B	3.59E-145	0.298020834	0.346	0.125	5.76E-141	SCT 2
SNHG15	3.73E-136	0.297890224	0.298	0.064	5.97E-132	CTB progenitor
SEC22B	1.35E-127	0.297104185	0.393	0.167	2.17E-123	SCT 2
HSP90B1	7.65E-108	0.296847968	0.785	0.629	1.23E-103	SCT progenitor
OLA1	4.93E-192	0.296629612	0.344	0.128	7.90E-188	CTB cycling
GLRX	4.33E-125	0.296621987	0.574	0.345	6.94E-121	SCT progenitor
TIMP2	3.36E-47	0.296377327	0.849	0.601	5.39E-43	SCT 1
RPL36A	3.90E-142	0.296361678	0.446	0.233	6.25E-138	CTB cycling
HNRNPA1	3.45E-49	0.296357473	0.903	0.737	5.53E-45	CTB 1
TMCO1	3.70E-92	0.296283309	0.367	0.121	5.93E-88	CTB progenitor
EIF3H	6.87E-136	0.296144579	0.482	0.269	1.10E-131	CTB cycling
UBE2M	8.47E-51	0.296043053	0.597	0.402	1.36E-46	CTB 1
CHSY1	4.20E-208	0.29575617	0.272	0.062	6.74E-204	SCT 2
HACD3	3.40E-106	0.295729803	0.424	0.206	5.46E-102	SCT 2
ZFAS1	3.66E-63	0.295628614	0.631	0.331	5.87E-59	CTB progenitor
BTG1	5.06E-90	0.295610435	0.512	0.295	8.11E-86	SCT 2
EIF3D	2.97E-144	0.295579073	0.428	0.217	4.77E-140	CTB cycling
ZNF292	2.26E-87	0.295564116	0.387	0.193	3.62E-83	SCT 2
PSMD11	5.88E-54	0.295304188	0.524	0.325	9.43E-50	CTB 1
SKP2	4.45E-180	0.295001291	0.345	0.134	7.13E-176	CTB cycling
SPAG9	8.58E-76	0.294980716	0.314	0.106	1.38E-71	CTB progenitor
H3F3A	3.11E-45	0.29488897	0.738	0.549	4.98E-41	CTB 1
HIGD2A	3.22E-136	0.294695391	0.443	0.235	5.16E-132	CTB cycling
MRPS26	9.67E-147	0.294592059	0.41	0.201	1.55E-142	CTB cycling
NRK	2.97E-62	0.294566362	0.454	0.208	4.76E-58	CTB progenitor
NET1	1.50E-91	0.294153786	0.353	0.113	2.40E-87	CTB progenitor
PHLDA2	1.78E-148	0.294051422	0.971	0.88	2.85E-144	CTB cycling
RPS20	1.63E-121	0.294031084	0.6	0.38	2.61E-117	CTB cycling
SEC61G	7.75E-41	0.293765326	0.621	0.447	1.24E-36	CTB 1
ENDOU	4.47E-269	0.293652377	0.262	0.045	7.16E-265	SCT 2
ARPC5	1.77E-154	0.293599533	0.402	0.189	2.83E-150	CTB cycling
CCNG1	7.75E-186	0.293530385	0.337	0.126	1.24E-181	CTB cycling
FAM195A	7.14E-180	0.293464235	0.35	0.138	1.14E-175	CTB cycling
ARID5B	1.48E-76	0.29328029	0.315	0.13	2.38E-72	CTB 1
RPS26	1.98E-41	0.293182051	0.883	0.767	3.18E-37	CTB progenitor
NME1	4.34E-57	0.292978385	0.546	0.282	6.95E-53	CTB progenitor
RPS11	7.39E-45	0.292960062	0.933	0.834	1.19E-40	CTB 1
PHPT1	3.18E-103	0.292902931	0.647	0.449	5.11E-99	CTB cycling
RAB11A	3.37E-91	0.292898377	0.572	0.34	5.40E-87	SCT 2
GNG12	1.22E-50	0.2922615	0.464	0.28	1.95E-46	CTB 1
SERP1	6.16E-80	0.292030875	0.666	0.444	9.89E-76	SCT 2
ARPC1A	6.78E-150	0.291902743	0.413	0.2	1.09E-145	CTB cycling
TOP1	3.12E-76	0.291888057	0.558	0.349	5.00E-72	SCT 2
MT2A	1.76E-170	0.291836757	0.268	0.089	2.83E-166	CTB cycling
SLC22A11	5.71E-108	0.2917344	0.393	0.18	9.16E-104	SCT 2
OCIAD1	5.37E-69	0.291616834	0.478	0.213	8.61E-65	CTB progenitor
CD55	3.44E-56	0.291426197	0.443	0.229	5.52E-52	SCT 1
LCP1	4.56E-113	0.291398092	0.372	0.163	7.31E-109	SCT 2
RBM3	3.10E-127	0.291238254	0.478	0.271	4.96E-123	CTB cycling
PPDPF	4.49E-168	0.29119197	0.377	0.161	7.21E-164	CTB cycling
EEF1E1	1.94E-82	0.291188464	0.402	0.148	3.11E-78	CTB progenitor
ZBTB38	1.10E-129	0.291039693	0.33	0.124	1.76E-125	SCT 2
PAICS	9.80E-160	0.290802062	0.374	0.165	1.57E-155	CTB cycling
SERP1	1.03E-35	0.290773588	0.64	0.46	1.65E-31	SCT 1
ATP2B4	1.78E-149	0.2902967	0.292	0.092	2.85E-145	SCT 2
ATP6V0D1	7.05E-65	0.290216392	0.466	0.253	1.13E-60	CTB 1
SEPW1	3.03E-122	0.290085346	0.499	0.293	4.86E-118	CTB cycling
SLC26A2	8.99E-73	0.290012297	0.361	0.19	1.44E-68	SCT 2
DCTPP1	1.28E-228	0.289831506	0.305	0.09	2.05E-224	CTB cycling
YWHAE	4.02E-109	0.289817445	0.697	0.493	6.45E-105	CTB cycling
BRI3	1.63E-119	0.28976559	0.504	0.299	2.61E-115	CTB cycling
RSRC2	7.64E-97	0.289726567	0.336	0.101	1.23E-92	CTB progenitor
DDRGK1	2.84E-140	0.289132525	0.358	0.136	4.56E-136	SCT 2
ANXA2	2.63E-37	0.28885978	0.807	0.595	4.22E-33	CTB progenitor
PARP1	6.22E-184	0.288679428	0.336	0.126	9.98E-180	CTB cycling
UGP2	1.46E-43	0.288570265	0.41	0.23	2.33E-39	SCT 1
JUP	5.30E-59	0.288486596	0.375	0.191	8.50E-55	CTB 1
ARL8B	3.40E-133	0.288367626	0.391	0.16	5.45E-129	SCT 2
CKS2	1.13E-113	0.288261633	0.426	0.236	1.81E-109	CTB cycling
TMED7	3.67E-146	0.28819976	0.333	0.117	5.88E-142	SCT 2
TMED4	5.04E-64	0.287995877	0.469	0.214	8.09E-60	CTB progenitor
MRPS12	1.85E-145	0.287682367	0.424	0.211	2.97E-141	CTB cycling
HMGA1	1.39E-49	0.287682007	0.871	0.567	2.23E-45	CTB progenitor
EEF1B2	8.78E-38	0.287642274	0.856	0.712	1.41E-33	CTB 1
CTNNAL1	2.16E-90	0.287574951	0.386	0.131	3.47E-86	CTB progenitor
LEPROT	4.11E-65	0.287421116	0.417	0.178	6.59E-61	CTB progenitor
CLPTM1	1.60E-143	0.287271197	0.33	0.117	2.56E-139	SCT 2
LAMTOR4	2.01E-128	0.287216381	0.46	0.254	3.23E-124	CTB cycling
CSRP2	1.31E-189	0.287180048	0.303	0.103	2.10E-185	CTB cycling
TOR1AIP2	5.43E-99	0.287145834	0.417	0.206	8.71E-95	SCT 2
NDUFV2	7.62E-126	0.287078251	0.482	0.275	1.22E-121	CTB cycling
IQGAP1	1.82E-103	0.286951503	0.353	0.158	2.92E-99	SCT 2
ADI1	4.78E-41	0.286873979	0.554	0.382	7.66E-37	CTB 1
PSMB2	3.15E-51	0.286614981	0.562	0.366	5.05E-47	CTB 1
RFK	7.48E-80	0.286612079	0.314	0.115	1.20E-75	SCT 1
GLRX5	3.80E-154	0.286600351	0.383	0.175	6.10E-150	CTB cycling
MAGT1	8.74E-162	0.28617689	0.317	0.1	1.40E-157	SCT 2
CNN3	1.55E-66	0.28604511	0.523	0.245	2.49E-62	CTB progenitor
MME	2.18E-60	0.285923564	0.295	0.11	3.50E-56	CTB progenitor
RPS19BP1	1.85E-132	0.285837744	0.427	0.223	2.97E-128	CTB cycling
HMGN3	1.20E-116	0.285764746	0.507	0.302	1.93E-112	CTB cycling
HACD3	7.98E-55	0.285720388	0.457	0.221	1.28E-50	CTB progenitor
HNRNPD	3.38E-115	0.285665043	0.524	0.32	5.41E-111	CTB cycling
SPTSSA	4.81E-49	0.28554926	0.415	0.241	7.71E-45	CTB 1
C1orf115	9.25E-50	0.28542429	0.43	0.233	1.48E-45	SCT 1
BTG2	5.38E-169	0.285188774	0.255	0.066	8.63E-165	SCT 2
OSTC	1.20E-36	0.284993054	0.576	0.397	1.93E-32	SCT 1
TRIAP1	7.32E-152	0.284848758	0.359	0.158	1.17E-147	CTB cycling
RDH11	8.62E-161	0.284705672	0.307	0.095	1.38E-156	SCT 2
BANF1	1.31E-145	0.284568189	0.4	0.192	2.10E-141	CTB cycling
PRDX2	2.09E-48	0.284542824	0.812	0.541	3.35E-44	CTB progenitor
TMBIM1	1.96E-134	0.284529039	0.338	0.126	3.14E-130	SCT 2
JUND	3.78E-71	0.28444117	0.916	0.728	6.07E-67	SCT 2
TPI1	1.82E-28	0.28394014	0.756	0.619	2.91E-24	SCT 1
NUDT4	3.45E-63	0.283613003	0.546	0.269	5.53E-59	CTB progenitor
EEF1E1	3.75E-177	0.283467324	0.32	0.119	6.02E-173	CTB cycling
PDIA3	6.75E-92	0.283452193	0.746	0.591	1.08E-87	SCT progenitor
ISYNA1	3.39E-107	0.283372218	0.642	0.429	5.44E-103	CTB cycling
UBE2I	1.53E-126	0.283090791	0.464	0.26	2.45E-122	CTB cycling
SRSF5	1.81E-41	0.282747001	0.544	0.373	2.90E-37	CTB 1
CLU	1.64E-61	0.282650215	0.286	0.103	2.62E-57	CTB progenitor
ADAM10	2.23E-146	0.282583008	0.292	0.094	3.57E-142	SCT 2
RNPS1	2.79E-71	0.282497428	0.55	0.255	4.47E-67	CTB progenitor
DYNLL1	7.04E-31	0.282453301	0.702	0.559	1.13E-26	CTB 1
DVL3	1.39E-100	0.282229785	0.43	0.215	2.22E-96	SCT 2
PTMA	2.15E-41	0.282213535	0.95	0.857	3.45E-37	CTB 1
UFM1	1.72E-112	0.282204059	0.385	0.171	2.75E-108	SCT 2
GXYLT1	1.32E-129	0.282194301	0.275	0.057	2.12E-125	CTB progenitor
HMGCS1	5.46E-108	0.281956505	0.392	0.18	8.75E-104	SCT 2
SLC9A1	1.71E-142	0.28189268	0.318	0.11	2.75E-138	SCT 2
PSMA7	2.53E-43	0.281646636	0.592	0.415	4.06E-39	CTB 1
ARRDC3	5.72E-65	0.281526493	0.259	0.094	9.17E-61	SCT 1
SUB1	9.53E-42	0.281409228	0.65	0.48	1.53E-37	CTB 1
LSM2	2.38E-172	0.281353277	0.346	0.138	3.81E-168	CTB cycling
BTG1	4.47E-40	0.281180495	0.496	0.31	7.17E-36	SCT 1
PDLIM2	2.59E-47	0.280958231	0.444	0.265	4.15E-43	CTB 1
CYP11A1	3.93E-83	0.280540107	0.732	0.573	6.31E-79	SCT progenitor
PRRC2C	4.64E-51	0.28051714	0.474	0.315	7.44E-47	SCT 2
PTTG1IP	9.30E-95	0.280492411	0.473	0.253	1.49E-90	SCT 2
LPCAT3	1.94E-111	0.28020116	0.272	0.064	3.10E-107	CTB progenitor
SRSF2	6.75E-113	0.280191874	0.449	0.256	1.08E-108	CTB cycling
TAGLN2	3.72E-56	0.279984596	0.475	0.232	5.96E-52	CTB progenitor
SNX5	1.22E-77	0.279918695	0.385	0.143	1.95E-73	CTB progenitor
TUBB4B	2.97E-97	0.279859498	0.612	0.422	4.76E-93	CTB cycling
ID3	0.007092793	0.279825105	0.288	0.27	1	CTB progenitor
CEBPB	3.23E-34	0.279802863	0.735	0.553	5.18E-30	SCT 1
SHFM1	3.70E-42	0.279801817	0.621	0.447	5.93E-38	CTB 1
MARCKSL1	1.42E-169	0.279588768	0.285	0.1	2.28E-165	CTB cycling
SEMA3B	7.26E-172	0.279587852	0.276	0.075	1.16E-167	SCT 2
ARF5	1.00E-72	0.278962514	0.406	0.161	1.61E-68	CTB progenitor
RPL13A	2.91E-72	0.278929333	0.856	0.842	4.66E-68	CTB 2
EPHB4	1.43E-51	0.278901258	0.386	0.18	2.29E-47	CTB progenitor
HSPA5	3.37E-105	0.278874544	0.762	0.586	5.40E-101	SCT progenitor
UBE2B	5.85E-89	0.278694816	0.532	0.307	9.39E-85	SCT 2
ANKLE2	8.75E-131	0.278667943	0.27	0.055	1.40E-126	CTB progenitor
PVRL3	2.45E-54	0.278533411	0.348	0.162	3.93E-50	SCT 1
SLC25A3	5.61E-41	0.278429629	0.854	0.689	9.00E-37	CTB 1
MT-ND6	2.06E-51	0.278383257	0.544	0.425	3.30E-47	CTB 2
FYTTD1	3.03E-159	0.278341124	0.306	0.095	4.86E-155	SCT 2
PCMT1	5.96E-60	0.278197519	0.385	0.164	9.56E-56	CTB progenitor
GNAI1	1.32E-60	0.277859295	0.386	0.198	2.12E-56	CTB 1
CCDC47	7.04E-111	0.27767713	0.376	0.166	1.13E-106	SCT 2
ROMO1	7.02E-130	0.277605632	0.41	0.21	1.13E-125	CTB cycling
CCT4	3.71E-125	0.27750585	0.472	0.264	5.96E-121	CTB cycling
ACTB	3.59E-37	0.277347868	0.946	0.838	5.76E-33	CTB 1
ATP6V0A1	4.51E-144	0.277047975	0.304	0.101	7.24E-140	SCT 2
ATP5A1	1.73E-104	0.276957247	0.636	0.434	2.77E-100	CTB cycling
TBL1X	1.19E-89	0.276942751	0.314	0.094	1.90E-85	CTB progenitor
DNMT1	4.51E-114	0.276777988	0.424	0.229	7.23E-110	CTB cycling
PTTG1IP	3.26E-39	0.276759501	0.444	0.269	5.23E-35	SCT 1
PPIF	2.04E-47	0.276475039	0.375	0.209	3.27E-43	CTB 1
TMEM14C	1.25E-66	0.276466963	0.445	0.193	2.00E-62	CTB progenitor
DBI	1.06E-39	0.276206913	0.744	0.552	1.70E-35	CTB 1
STMN1	1.13E-44	0.276160331	0.35	0.166	1.82E-40	CTB progenitor
SLC3A2	1.79E-41	0.27605563	0.636	0.39	2.87E-37	CTB progenitor
PPP1CC	3.93E-143	0.275927681	0.374	0.173	6.30E-139	CTB cycling
MRPL12	4.01E-133	0.275790412	0.406	0.205	6.42E-129	CTB cycling
NDUFC2	1.32E-52	0.275740927	0.63	0.351	2.12E-48	CTB progenitor
OAZ1	6.73E-39	0.27573033	0.85	0.708	1.08E-34	CTB 1
COMMD6	9.44E-141	0.275647129	0.392	0.188	1.51E-136	CTB cycling
PLA2G16	4.33E-122	0.275575112	0.42	0.224	6.94E-118	CTB cycling
CCT5	1.43E-110	0.275254461	0.528	0.328	2.29E-106	CTB cycling
RPS10	3.49E-42	0.274994663	0.779	0.585	5.60E-38	CTB 1
C19orf48	7.38E-65	0.274978007	0.497	0.23	1.18E-60	CTB progenitor
POLR2H	1.02E-48	0.274923291	0.47	0.287	1.64E-44	CTB 1
ERRFI1	4.53E-55	0.274808422	0.313	0.138	7.27E-51	SCT 1
AKR1B1	3.51E-27	0.274790712	0.912	0.821	5.63E-23	SCT 1
AUP1	2.01E-94	0.274763345	0.424	0.216	3.22E-90	SCT 2
SRSF7	1.28E-118	0.274676543	0.455	0.25	2.05E-114	CTB cycling
LAMP1	3.32E-38	0.274639	0.548	0.359	5.33E-34	SCT 1
YIF1A	1.30E-132	0.274598117	0.338	0.127	2.09E-128	SCT 2
SEC61B	6.20E-32	0.274517404	0.599	0.465	9.95E-28	CTB 1
USO1	2.35E-128	0.274510993	0.34	0.13	3.77E-124	SCT 2
SH3GLB2	1.77E-91	0.27446766	0.434	0.227	2.84E-87	SCT 2
PAQR7	1.06E-130	0.274314477	0.294	0.102	1.70E-126	SCT 2
RPL7	1.44E-44	0.274259805	0.891	0.752	2.31E-40	CTB 1
S1PR2	8.19E-85	0.274181639	0.342	0.113	1.31E-80	CTB progenitor
FXYD5	6.78E-184	0.274127054	0.263	0.065	1.09E-179	SCT 2
TFPI	4.70E-139	0.274078131	0.614	0.359	7.53E-135	SCT progenitor
SDF2L1	3.00E-36	0.273937262	0.521	0.336	4.81E-32	SCT 1
C10orf10	1.35E-103	0.273921915	0.407	0.192	2.16E-99	SCT 2
NDUFS8	9.91E-131	0.273903179	0.394	0.197	1.59E-126	CTB cycling
NDUFB10	5.16E-131	0.273525546	0.423	0.219	8.27E-127	CTB cycling
NHP2	2.91E-137	0.273493907	0.375	0.179	4.67E-133	CTB cycling
UQCRFS1	5.87E-46	0.273457955	0.537	0.354	9.42E-42	CTB 1
MDFI	7.44E-146	0.273210702	0.34	0.148	1.19E-141	CTB cycling
PSG1	1.62E-143	0.27266873	0.564	0.315	2.60E-139	SCT progenitor
PSG6	2.20E-133	0.272396757	0.553	0.312	3.53E-129	SCT progenitor
PTMS	3.83E-128	0.27225391	0.382	0.188	6.14E-124	CTB cycling
CISD1	2.82E-72	0.272228561	0.414	0.166	4.53E-68	CTB progenitor
TMX1	6.00E-91	0.272183703	0.288	0.081	9.62E-87	CTB progenitor
DSTN	9.98E-99	0.272134959	0.64	0.444	1.60E-94	CTB cycling
COX7B	8.87E-91	0.272110244	0.671	0.48	1.42E-86	CTB cycling
BPTF	3.17E-91	0.27205216	0.316	0.094	5.09E-87	CTB progenitor
PSMB3	5.23E-110	0.271915048	0.556	0.351	8.38E-106	CTB cycling
PSMA1	2.58E-42	0.271899799	0.587	0.416	4.13E-38	CTB 1
DUSP9	2.55E-50	0.271680836	0.819	0.508	4.09E-46	CTB progenitor
CD24	2.99E-30	0.271673442	0.589	0.432	4.80E-26	CTB 1
CCNL2	1.24E-87	0.271641283	0.271	0.075	1.99E-83	CTB progenitor
TMED2	4.25E-38	0.271314965	0.508	0.325	6.82E-34	SCT 1
RSL1D1	8.37E-53	0.271112626	0.582	0.318	1.34E-48	CTB progenitor
CDKN1C	1.02E-23	0.270972936	0.95	0.899	1.63E-19	CTB progenitor
ATP1B3	3.81E-83	0.270842459	0.559	0.337	6.11E-79	SCT 2
RBM17	1.35E-85	0.270644006	0.369	0.126	2.16E-81	CTB progenitor
ETF1	3.32E-48	0.270550047	0.49	0.303	5.33E-44	CTB 1
PPP1R14B	1.18E-28	0.270348225	0.664	0.519	1.90E-24	SCT 1
PSMA3	4.18E-42	0.270288692	0.533	0.358	6.71E-38	CTB 1
CYCS	4.83E-47	0.270164034	0.621	0.363	7.75E-43	CTB progenitor
MSX2	2.98E-38	0.270058094	0.516	0.306	4.79E-34	CTB progenitor
ATP6V1F	1.36E-84	0.269839671	0.432	0.232	2.18E-80	SCT 2
SLC44A2	8.67E-119	0.269820382	0.336	0.134	1.39E-114	SCT 2
SERINC5	6.26E-151	0.269653608	0.306	0.098	1.00E-146	SCT 2
YWHAH	7.58E-71	0.269590237	0.349	0.129	1.21E-66	CTB progenitor
SIVA1	1.94E-155	0.269440203	0.334	0.138	3.11E-151	CTB cycling
LIFR	1.09E-103	0.269102447	0.465	0.273	1.75E-99	SCT progenitor
POLR1D	2.16E-69	0.268957813	0.475	0.206	3.46E-65	CTB progenitor
MBD2	1.29E-121	0.268955733	0.32	0.122	2.07E-117	SCT 2
PSMA7	1.04E-106	0.268707192	0.59	0.385	1.67E-102	CTB cycling
TGM2	9.97E-78	0.268695868	0.691	0.549	1.60E-73	SCT progenitor
RIF1	3.75E-83	0.268569414	0.307	0.095	6.02E-79	CTB progenitor
TMEM41B	1.32E-127	0.268233507	0.314	0.115	2.12E-123	SCT 2
UBAC1	1.72E-82	0.268138466	0.378	0.133	2.76E-78	CTB progenitor
SNRPG	2.23E-37	0.268124804	0.721	0.551	3.58E-33	CTB 1
MRPL14	3.34E-120	0.268084902	0.426	0.23	5.36E-116	CTB cycling
LSM5	6.57E-70	0.26805851	0.434	0.18	1.05E-65	CTB progenitor
EPS8L1	4.60E-63	0.268053278	0.291	0.116	7.37E-59	SCT 1
CCT6A	4.93E-107	0.267961008	0.557	0.353	7.91E-103	CTB cycling
PDIA6	9.46E-45	0.26792313	0.779	0.474	1.52E-40	CTB progenitor
SNRPB	1.81E-60	0.267830492	0.689	0.37	2.90E-56	CTB progenitor
SARAF	4.45E-60	0.267422244	0.394	0.17	7.13E-56	CTB progenitor
ATP2A2	9.25E-66	0.267378007	0.334	0.126	1.48E-61	CTB progenitor
CYB5B	3.00E-63	0.267292631	0.509	0.238	4.81E-59	CTB progenitor
EPHB4	2.30E-60	0.267224789	0.357	0.176	3.69E-56	CTB 1
ZNF292	1.06E-43	0.267210173	0.364	0.204	1.70E-39	CTB 1
STX3	1.25E-137	0.267197369	0.29	0.096	2.01E-133	SCT 2
SMG1	8.28E-110	0.267135193	0.282	0.068	1.33E-105	CTB progenitor
PPP1CB	4.39E-30	0.26713009	0.724	0.555	7.04E-26	SCT 1
TYMS	9.29E-36	0.267070342	0.386	0.235	1.49E-31	CTB 1
AP1S1	2.22E-149	0.266968255	0.352	0.153	3.55E-145	CTB cycling
LYPLA1	9.76E-79	0.266767283	0.461	0.262	1.57E-74	SCT 2
UBE2I	6.41E-52	0.266506634	0.482	0.287	1.03E-47	CTB 1
RTN3	7.28E-105	0.266428054	0.384	0.175	1.17E-100	SCT 2
ATP5B	1.47E-35	0.266165218	0.756	0.605	2.35E-31	CTB 1
CSRP2	2.53E-65	0.266118674	0.348	0.134	4.07E-61	CTB progenitor
GOLGA2	3.25E-124	0.265967582	0.283	0.098	5.20E-120	SCT 2
HDLBP	1.68E-64	0.26593111	0.573	0.379	2.69E-60	SCT 2
HNRNPAB	3.03E-109	0.265925445	0.431	0.241	4.86E-105	CTB cycling
CARD16	3.58E-167	0.265924973	0.252	0.064	5.73E-163	SCT 2
EMC7	1.45E-123	0.265727735	0.321	0.122	2.33E-119	SCT 2
EID1	8.05E-75	0.265676199	0.351	0.126	1.29E-70	CTB progenitor
SNU13	1.60E-100	0.265614398	0.559	0.365	2.57E-96	CTB cycling
BAX	8.52E-116	0.265321496	0.449	0.253	1.37E-111	CTB cycling
GANAB	1.49E-59	0.265307528	0.351	0.144	2.40E-55	CTB progenitor
FHDC1	3.18E-124	0.26514765	0.296	0.106	5.09E-120	SCT 2
KRT18	2.08E-75	0.264908846	0.995	0.977	3.33E-71	SCT 2
CLTA	4.74E-90	0.264702321	0.764	0.578	7.61E-86	CTB cycling
EIF4A1	1.24E-56	0.264644448	0.507	0.251	1.99E-52	CTB progenitor
RPS25	2.53E-39	0.264582103	0.915	0.806	4.05E-35	CTB progenitor
PSMA3	1.21E-105	0.264562974	0.527	0.33	1.94E-101	CTB cycling
ILVBL	2.85E-146	0.264460155	0.301	0.098	4.57E-142	SCT 2
SF3B6	4.12E-106	0.264437146	0.485	0.293	6.61E-102	CTB cycling
ADRM1	2.58E-48	0.264220812	0.479	0.293	4.13E-44	CTB 1
RBM3	1.08E-58	0.264139397	0.582	0.3	1.72E-54	CTB progenitor
PPIB	2.12E-102	0.263702132	0.889	0.783	3.40E-98	SCT progenitor
ERP29	4.38E-73	0.263616977	0.657	0.438	7.03E-69	SCT 2
EIF2AK1	1.17E-50	0.263569206	0.445	0.259	1.88E-46	CTB 1
STAT5B	1.48E-170	0.263539797	0.259	0.067	2.38E-166	SCT 2
RPS21	1.11E-45	0.263385674	0.957	0.811	1.78E-41	CTB progenitor
ZBTB38	4.88E-63	0.263290526	0.307	0.136	7.83E-59	CTB 1
VDAC3	1.63E-156	0.26326376	0.327	0.132	2.61E-152	CTB cycling
AHCY	1.55E-144	0.263158024	0.349	0.154	2.48E-140	CTB cycling
B4GALT1	5.43E-46	0.263102588	0.426	0.216	8.71E-42	CTB progenitor
DEK	2.26E-130	0.262970237	0.348	0.161	3.63E-126	CTB cycling
MPP1	2.47E-44	0.262941177	0.395	0.23	3.96E-40	CTB 1
TMED4	5.25E-88	0.262847561	0.399	0.203	8.42E-84	SCT 2
DNAJA1	1.43E-51	0.262820266	0.627	0.351	2.30E-47	CTB progenitor
SBDS	2.83E-96	0.262758634	0.395	0.191	4.54E-92	SCT 2
STK40	1.39E-156	0.262459639	0.283	0.084	2.23E-152	SCT 2
PRDX3	1.91E-57	0.262189483	0.469	0.222	3.07E-53	CTB progenitor
BAG2	3.35E-76	0.262053077	0.333	0.114	5.37E-72	CTB progenitor
FAM46A	3.88E-39	0.26197393	0.425	0.242	6.22E-35	SCT 1
TMEM40	9.94E-129	0.261788817	0.311	0.112	1.59E-124	SCT 2
SEC61A1	2.71E-39	0.261741635	0.49	0.302	4.34E-35	SCT 1
CBX4	1.02E-164	0.261698373	0.286	0.101	1.63E-160	CTB cycling
MLLT1	6.35E-35	0.261636853	0.843	0.601	1.02E-30	CTB progenitor
RBX1	4.08E-95	0.261635048	0.665	0.471	6.54E-91	CTB cycling
MIF	3.98E-85	0.261623868	0.846	0.678	6.38E-81	CTB cycling
TXNDC17	7.22E-162	0.261606493	0.307	0.117	1.16E-157	CTB cycling
ST3GAL4	5.56E-50	0.26155671	0.409	0.229	8.92E-46	CTB 1
TPI1	2.39E-33	0.261490365	0.768	0.616	3.83E-29	CTB 1
UBC	3.74E-30	0.261247896	0.832	0.69	6.00E-26	SCT 1
SEC31A	4.77E-104	0.260893003	0.325	0.137	7.65E-100	SCT 2
MYCBP2	2.02E-97	0.260814488	0.276	0.071	3.23E-93	CTB progenitor
PEG3	7.84E-28	0.260581191	0.543	0.391	1.26E-23	CTB 1
COX5A	5.10E-43	0.260420361	0.633	0.439	8.17E-39	CTB 1
TFAP2A	2.05E-80	0.260245898	0.41	0.218	3.28E-76	SCT 2
RBBP7	4.06E-97	0.260023554	0.488	0.305	6.50E-93	CTB cycling
ERP44	3.97E-45	0.259822027	0.428	0.233	6.37E-41	SCT 1
MKNK2	5.59E-41	0.259796696	0.277	0.132	8.97E-37	SCT 1
NDUFA11	2.44E-101	0.259677387	0.52	0.33	3.92E-97	CTB cycling
H3F3B	8.16E-100	0.259635965	0.776	0.549	1.31E-95	CTB cycling
COPE	1.17E-71	0.259434213	0.575	0.367	1.88E-67	SCT 2
MDH2	1.55E-52	0.259425485	0.63	0.349	2.49E-48	CTB progenitor
GBA	1.91E-129	0.259393021	0.303	0.107	3.07E-125	SCT 2
SSR4	6.11E-36	0.259141546	0.592	0.403	9.80E-32	SCT 1
NUCKS1	6.77E-94	0.259042533	0.418	0.246	1.09E-89	CTB cycling
YWHAZ	1.14E-68	0.259013797	0.624	0.417	1.83E-64	SCT 2
MRPS6	1.25E-48	0.258936652	0.403	0.229	2.00E-44	CTB 1
SF3B5	3.32E-122	0.258856939	0.376	0.189	5.33E-118	CTB cycling
NUPR1	5.27E-26	0.258344117	0.576	0.424	8.46E-22	SCT 1
MSMO1	1.53E-41	0.2580904	0.444	0.257	2.46E-37	SCT 1
PAIP2	1.16E-48	0.258083572	0.394	0.221	1.87E-44	CTB 1
HIST1H1C	6.49E-38	0.258052372	0.355	0.193	1.04E-33	SCT 1
PGP	2.08E-116	0.258027657	0.399	0.21	3.33E-112	CTB cycling
APPBP2	8.58E-142	0.2578595	0.272	0.084	1.38E-137	SCT 2
SLC7A6	1.97E-93	0.257830972	0.264	0.069	3.15E-89	CTB progenitor
CAPN6	7.07E-44	0.25768706	0.395	0.214	1.13E-39	SCT 1
SLC38A2	9.20E-29	0.257588692	0.43	0.28	1.47E-24	SCT 1
NUDT4	2.42E-110	0.257574697	0.434	0.243	3.88E-106	CTB cycling
PHB	2.25E-56	0.257501971	0.543	0.275	3.62E-52	CTB progenitor
ERVH48-1	8.92E-83	0.257057367	0.275	0.08	1.43E-78	CTB progenitor
BASP1	2.34E-99	0.257008173	0.72	0.514	3.75E-95	SCT progenitor
PSME2	7.53E-122	0.256900929	0.387	0.197	1.21E-117	CTB cycling
BAG2	9.28E-189	0.256814057	0.275	0.086	1.49E-184	CTB cycling
TSPAN3	2.11E-74	0.256801374	0.297	0.097	3.39E-70	CTB progenitor
SOD1	1.26E-37	0.256749398	0.728	0.547	2.02E-33	CTB 1
SYVN1	1.92E-176	0.25670235	0.253	0.062	3.09E-172	SCT 2
PAGE4	2.82E-93	0.256688666	0.996	0.938	4.53E-89	CTB 2
UBA52	1.47E-38	0.25665559	0.935	0.844	2.35E-34	CTB 1
COG3	7.77E-161	0.256618767	0.271	0.076	1.25E-156	SCT 2
ERH	7.25E-50	0.256591787	0.659	0.381	1.16E-45	CTB progenitor
SLC19A1	4.92E-44	0.256441818	0.312	0.14	7.89E-40	CTB progenitor
MRPL11	2.28E-162	0.25640884	0.314	0.121	3.65E-158	CTB cycling
CTB-55O6.8	7.81E-186	0.256342614	0.253	0.059	1.25E-181	SCT 2
NPB	1.81E-30	0.256335148	0.457	0.291	2.90E-26	SCT 1
NEU1	6.14E-53	0.256329789	0.36	0.171	9.84E-49	SCT 1
CDKN1C	1.03E-133	0.256311656	0.975	0.882	1.66E-129	CTB cycling
NPM1	1.76E-37	0.256266044	0.943	0.834	2.81E-33	CTB 1
COX20	2.05E-97	0.256181929	0.457	0.275	3.28E-93	CTB cycling
TMEM165	1.58E-113	0.256171121	0.251	0.054	2.53E-109	CTB progenitor
RAB5B	3.14E-138	0.256106006	0.28	0.09	5.04E-134	SCT 2
RPL17	1.85E-125	0.255789143	0.36	0.173	2.96E-121	CTB cycling
DNAJB11	5.48E-45	0.255743873	0.393	0.209	8.78E-41	SCT 1
NDUFB8	3.60E-115	0.255704184	0.393	0.207	5.77E-111	CTB cycling
SHFM1	1.90E-94	0.255687936	0.614	0.42	3.04E-90	CTB cycling
SLC18B1	6.29E-65	0.255509552	0.317	0.117	1.01E-60	CTB progenitor
MAGOH	2.83E-48	0.255374102	0.392	0.22	4.54E-44	CTB 1
HNRNPM	3.91E-95	0.255236746	0.428	0.252	6.27E-91	CTB cycling
C4orf19	3.91E-183	0.255196708	0.252	0.06	6.27E-179	SCT 2
LCMT1-AS2	2.52E-41	0.255135305	0.467	0.288	4.04E-37	CTB 1
GNL3	9.05E-61	0.255089696	0.411	0.178	1.45E-56	CTB progenitor
COPB2	5.42E-90	0.254967216	0.327	0.148	8.69E-86	SCT 2
EIF3M	1.20E-115	0.254914573	0.411	0.22	1.93E-111	CTB cycling
TEAD1	4.19E-64	0.254908045	0.315	0.115	6.72E-60	CTB progenitor
CACYBP	7.40E-48	0.254901181	0.53	0.288	1.19E-43	CTB progenitor
CCT8	4.96E-98	0.254581856	0.462	0.28	7.96E-94	CTB cycling
HMGCR	4.39E-94	0.254572444	0.339	0.152	7.04E-90	SCT 2
ARF4	1.88E-30	0.254557912	0.525	0.361	3.02E-26	SCT 1
EVA1B	5.74E-31	0.25449069	0.615	0.434	9.20E-27	SCT 1
AP2S1	1.26E-33	0.254208139	0.678	0.528	2.02E-29	CTB 1
SLC43A2	2.43E-31	0.254191915	0.626	0.442	3.90E-27	SCT 1
CHD1	3.39E-77	0.254182722	0.302	0.097	5.44E-73	CTB progenitor
MZT2A	2.66E-177	0.254071886	0.298	0.104	4.27E-173	CTB cycling
EIF4B	1.25E-87	0.253855509	0.6	0.415	2.01E-83	CTB cycling
SLC44A1	1.75E-81	0.253847626	0.404	0.212	2.80E-77	SCT 2
NDUFB7	1.83E-97	0.253758952	0.535	0.342	2.93E-93	CTB cycling
PSMB2	6.92E-98	0.253624279	0.533	0.341	1.11E-93	CTB cycling
RPL7A	5.00E-37	0.2534581	0.962	0.97	8.02E-33	CTB progenitor
TFDP1	9.82E-134	0.253359118	0.332	0.148	1.58E-129	CTB cycling
BTG1	7.88E-36	0.253258289	0.465	0.309	1.26E-31	CTB 1
P2RY6	4.33E-125	0.253122561	0.315	0.116	6.94E-121	SCT 2
CDO1	2.39E-122	0.253082907	0.302	0.11	3.84E-118	SCT 2
PTP4A2	6.61E-78	0.252990082	0.411	0.223	1.06E-73	SCT 2
MRPL52	6.31E-105	0.252857289	0.45	0.262	1.01E-100	CTB cycling
TOMM40	9.40E-55	0.252733214	0.398	0.179	1.51E-50	CTB progenitor
CCT7	1.17E-106	0.252613774	0.443	0.253	1.88E-102	CTB cycling
OST4	4.94E-89	0.252302514	0.552	0.368	7.93E-85	CTB cycling
CALU	4.29E-34	0.251943897	0.514	0.329	6.88E-30	SCT 1
UBE2I	2.08E-59	0.251879608	0.575	0.288	3.33E-55	CTB progenitor
SAR1A	2.41E-85	0.251851994	0.426	0.225	3.87E-81	SCT 2
HEXIM1	6.38E-29	0.251847448	0.493	0.333	1.02E-24	SCT 1
TXN2	6.10E-106	0.251800273	0.398	0.217	9.79E-102	CTB cycling
TOMM22	4.46E-120	0.251757294	0.368	0.183	7.15E-116	CTB cycling
SSB	1.88E-115	0.251448517	0.376	0.192	3.01E-111	CTB cycling
ACBD3	1.67E-131	0.25118404	0.283	0.094	2.68E-127	SCT 2
C6orf62	4.02E-78	0.25098942	0.376	0.194	6.44E-74	SCT 2
MRPS26	4.65E-51	0.250976275	0.469	0.233	7.46E-47	CTB progenitor
NRBF2	3.43E-141	0.250863507	0.282	0.089	5.50E-137	SCT 2
LMNA	1.20E-65	0.250846531	0.522	0.331	1.93E-61	SCT 2
RNPS1	2.26E-103	0.250742114	0.414	0.232	3.62E-99	CTB cycling
GLMP	7.08E-143	0.2505453	0.27	0.082	1.14E-138	SCT 2
CFL1	1.93E-80	0.250518789	0.898	0.75	3.10E-76	CTB cycling
RSL24D1	3.72E-109	0.250507472	0.366	0.19	5.97E-105	CTB cycling
FAM195A	1.98E-61	0.25049069	0.401	0.17	3.18E-57	CTB progenitor
ITM2B	3.28E-76	0.250293437	0.683	0.532	5.27E-72	SCT progenitor
SLC52A1	1.22E-62	0.250210044	0.276	0.116	1.96E-58	CTB 1
DERL1	8.45E-135	0.250163589	0.285	0.094	1.35E-130	SCT 2
NF1	1.26E-80	0.250135626	0.262	0.075	2.03E-76	CTB progenitor
RPL37A	4.16E-36	0.250009114	0.915	0.777	6.67E-32	CTB 1
HECTD1	2.44E-71	0.250005111	0.31	0.106	3.92E-67	CTB progenitor

## Sheet: CVS_TO integrated
gene	p_val	avg_log2FC	pct.1	pct.2	p_val_adj	cluster
MT-ATP6	0	3419175226	0.966	0.194	0	SCT 1
PAWR	0	1300935702	1	0.985	0	CTB progenitor stressed
MRPL19	0	2627189411	0.999	0.898	0	SCT 2
ZNF326	0	129949322	1	0.993	0	CTB progenitor stressed
COPS5	0	2445443328	0.888	0.125	0	SCT 1
LINC00493	0	1270435892	1	0.99	0	CTB progenitor stressed
TXNDC12	0	2302298764	0.987	0.615	0	SCT 2
DNAJB11	0	229721963	0.798	0.31	0	SCT 2
BTF3L4	0	0.985564323	1	0.984	0	CTB progenitor stressed
NCOA4	0	2147461008	0.948	0.526	0	SCT 2
RTFDC1	0	2052406437	0.935	0.282	0	SCT 2
LRRC59	1.03E-304	2051041153	0.981	0.906	1.88E-300	SCT 1
PSMD6	0	0.950467875	1	0.986	0	CTB progenitor stressed
EBNA1BP2	0	1976749191	0.946	0.373	0	SCT 2
ANAPC5	0	1885660639	0.691	0.244	0	CTB 1
RTF1	0	1878095657	0.943	0.294	0	SCT 2
VPS25	0	1869661374	0.836	0.251	0	SCT 2
BBX	0	0.811550861	1	0.998	0	CTB progenitor stressed
QKI	0	0.738683548	1	0.98	0	CTB progenitor stressed
RAB7A	0	0.572876377	1	0.975	0	CTB progenitor stressed
KRAS	0	1729150838	0.907	0.418	0	SCT 1
B3GAT3	0	1728559422	0.966	0.347	0	SCT 2
GLRX3	0	1326913354	0.999	0.97	0	CTB progenitor stressed
SPPL2A	0	1094415745	0.999	0.956	0	CTB progenitor stressed
SMDT1	0	1013413528	0.999	0.985	0	CTB progenitor stressed
NDUFS3	0	1574708309	0.849	0.218	0	SCT 1
WHSC1L1	0	0.964215064	0.999	0.973	0	CTB progenitor stressed
GTF3C6	0	0.919178911	0.999	0.985	0	CTB progenitor stressed
TMEM141	0	1557721607	0.889	0.686	0	CTB progenitor-like
DDX18	0	154954479	0.888	0.196	0	SCT 2
SRI	0	1540145916	0.886	0.538	0	CTB progenitor
NOP58	0	1523917435	0.874	0.334	0	SCT 1
WBSCR22	5.60E-155	1518002267	0.817	0.711	1.02E-150	CTB progenitor
AKR1A1	0	0.85588641	0.999	0.985	0	CTB progenitor stressed
ACAA1	0	1485418355	1	0.993	0	CTB progenitor
C7orf73	0	0.832703265	0.999	0.987	0	CTB progenitor stressed
UFD1L	0	1466071451	1	0.99	0	CTB progenitor
MRPL21	0	1458483442	0.935	0.797	0	CTB progenitor-like
PPP4C	0	1428969732	0.93	0.745	0	CTB progenitor
PSMB4	8.13E-238	1428715309	0.998	0.972	1.48E-233	CTB progenitor
IMMT	0	0.825162761	0.999	0.966	0	CTB progenitor stressed
ZSWIM7	0	0.790524075	0.999	0.99	0	CTB progenitor stressed
ABCE1	0	1411644311	0.935	0.616	0	CTB progenitor
SLC25A36	0	1401436254	0.835	0.384	0	CTB progenitor
PLBD1	0	1400503865	1	0.894	0	SCT progenitor
POLR2J	0	0.78622734	0.999	0.983	0	CTB progenitor stressed
RAB5C	0	1390014651	1	0.985	0	CTB progenitor
SNRNP70	0	1387779504	0.953	0.756	0	CTB progenitor
BDP1	0	0.75332975	0.999	0.993	0	CTB progenitor stressed
BRK1	1.87E-281	1375225824	1	0.987	3.39E-277	CTB progenitor
STUB1	0	0.744143842	0.999	0.99	0	CTB progenitor stressed
DDX3Y	0	1373177698	0.735	0.143	0	SCT 2
NAE1	0	1060950843	0.998	0.949	0	CTB progenitor stressed
SPAG7	0	0.960948662	0.998	0.977	0	CTB progenitor stressed
PSMD2	0	1349433404	0.946	0.515	0	SCT 2
VPS26A	0	0.875430522	0.998	0.939	0	CTB progenitor stressed
MRPL17	0	0.83333902	0.998	0.969	0	CTB progenitor stressed
C8orf59	0	1340331316	0.681	0.181	0	CTB 1
CIAO1	0	0.804092881	0.998	0.973	0	CTB progenitor stressed
EI24	0	0.802035251	0.998	0.968	0	CTB progenitor stressed
ZNF207	0	0.7997411	0.998	0.914	0	CTB progenitor stressed
TRA2B	0	0.630284505	0.998	0.961	0	CTB progenitor stressed
ERGIC3	0	1323666017	0.758	0.357	0	CTB progenitor
TTC19	0	132059461	0.841	0.198	0	SCT 1
MRPL32	0	1315294779	0.914	0.684	0	CTB progenitor
SNRPB2	0	1305761355	0.934	0.396	0	SCT 1
MRPS10	0	1303031847	0.872	0.36	0	SCT progenitor
ZNHIT1	0	2151384252	0.997	0.726	0	CTB progenitor stressed
ARHGAP18	0	1046690987	0.997	0.972	0	CTB progenitor stressed
EIF2S1	0	0.922241577	0.997	0.907	0	CTB progenitor stressed
YIPF6	0	1300451709	0.996	0.974	0	CTB progenitor-like
FKBP1A	0	0.886441128	0.997	0.968	0	CTB progenitor stressed
TMED3	0	1294249971	0.772	0.138	0	SCT 2
AES	0	1292372577	0.893	0.61	0	CTB progenitor
GABARAPL2	0	1288863012	0.904	0.347	0	SCT 2
TNFAIP8	0	0.869390196	0.997	0.946	0	CTB progenitor stressed
PUF60	9.76E-230	1281594796	0.941	0.853	1.77E-225	CTB progenitor
SNX2	0	1276262679	0.89	0.631	0	CTB progenitor
C19orf24	0	0.864285507	0.997	0.852	0	CTB progenitor stressed
MRPS33	0	0.818328352	0.997	0.945	0	CTB progenitor stressed
SNX5	0	1268204361	0.987	0.911	0	CTB progenitor-like
TEX264	0	1266539874	0.92	0.777	0	CTB progenitor-like
ECI1	0	0.800229621	0.997	0.991	0	CTB progenitor stressed
SCAMP2	0	0.795933806	0.997	0.908	0	CTB progenitor stressed
CDC123	0	1257056372	0.999	0.967	0	CTB progenitor-like
METAP2	0	1255089892	0.958	0.852	0	CTB progenitor-like
SYF2	8.58E-156	1254505874	0.935	0.87	1.56E-151	CTB progenitor
SPTSSA	0	0.776505544	0.997	0.955	0	CTB progenitor stressed
GANAB	0	1251217482	0.805	0.173	0	SCT 2
BRD7	0	1249024268	0.954	0.866	0	CTB progenitor-like
CLTB	0	1248124759	0.857	0.449	0	CTB progenitor
FAM3B	1.59E-306	1236436063	1	0.985	2.88E-302	CTB progenitor
MRPS35	0	0.7619864	0.997	0.967	0	CTB progenitor stressed
MCL1	0	0.728692653	0.997	0.942	0	CTB progenitor stressed
FXR1	1.54E-251	1231330607	0.999	0.959	2.79E-247	CTB progenitor
CSF2RA	0	1230815236	0.736	0.457	0	CTB 1
NDUFS2	0	122887776	0.797	0.149	0	SCT 2
PDE4DIP	0	1228597787	0.81	0.508	0	CTB progenitor
UBE2K	4.87E-275	1228481137	0.529	0.243	8.84E-271	CTB 1
ATP1A1	0	1227760835	0.975	0.919	0	CTB progenitor-like
CCDC6	0	0.571258518	0.997	0.975	0	CTB progenitor stressed
RAD21	0	122376167	0.641	0.164	0	SCT 2
EMC7	0	1221970669	0.87	0.591	0	CTB progenitor
SEC61A1	0	115755445	0.996	0.944	0	CTB progenitor stressed
LCMT1	0	1110869751	0.996	0.672	0	CTB progenitor stressed
DYNLRB1	0	1219033539	0.779	0.173	0	SCT 2
ANAPC16	0	1217310254	0.997	0.965	0	CTB progenitor-like
GPBP1	0	1210764358	0.727	0.127	0	SCT 1
ANKRD11	0	1017666698	0.996	0.946	0	CTB progenitor stressed
SEPP1	0	120783243	0.912	0.382	0	SCT 2
NAP1L4	0	1205827486	0.976	0.908	0	CTB progenitor-like
BMP7	0	1200840473	0.831	0.297	0	SCT 2
FAM104A	0	1200788288	0.703	0.125	0	SCT 2
ACTR6	0	1197676187	0.995	0.971	0	CTB progenitor-like
SF1	2.42E-156	1197528802	0.886	0.56	4.40E-152	SCT 1
GNL3	0	1017493797	0.996	0.877	0	CTB progenitor stressed
SMARCC1	0	1197004482	0.806	0.199	0	SCT 2
COPZ1	6.33E-298	1195990691	0.931	0.515	1.15E-293	SCT 1
IMPA2	0	1195331131	0.968	0.892	0	CTB progenitor-like
SEC61G	0	1193548855	0.993	0.954	0	CTB progenitor-like
NHP2	0	0.787146523	0.996	0.966	0	CTB progenitor stressed
POLR2F	0	1191648718	1	0.986	0	CTB progenitor-like
MRPS6	0	0.725225565	0.996	0.912	0	CTB progenitor stressed
SLTM	0	0.902745593	0.995	0.915	0	CTB progenitor stressed
SSNA1	0	118473711	0.966	0.603	0	SCT progenitor
CCNDBP1	0	0.851787281	0.995	0.886	0	CTB progenitor stressed
TAF10	0	1180223825	0.851	0.55	0	CTB progenitor
TMCO1	0	0.837478686	0.995	0.942	0	CTB progenitor stressed
DPY30	0	0.765694222	0.995	0.914	0	CTB progenitor stressed
HSD17B12	0	117509858	0.996	0.966	0	CTB progenitor-like
COPB2	0	1175066124	1	0.989	0	CTB progenitor-like
NDUFA11	0	1172800237	0.764	0.383	0	CTB progenitor
DHX36	0	1171051941	0.727	0.119	0	SCT 2
PPP4R2	0	0.732376126	0.995	0.974	0	CTB progenitor stressed
LSM6	0	1169430652	0.934	0.511	0	SCT progenitor
SUMO1	0	1168865244	0.963	0.886	0	CTB progenitor-like
HDGF	0	0.826680671	0.994	0.87	0	CTB progenitor stressed
ACAT2	0	1167013976	0.628	0.11	0	SCT 2
UBE2H	8.87E-214	1165569205	0.966	0.644	1.61E-209	SCT 1
PSMC1	0	1158641252	0.959	0.693	0	CTB progenitor
UXT	0	1158226015	0.998	0.959	0	CTB progenitor-like
NDUFB1	0	0.805876811	0.994	0.867	0	CTB progenitor stressed
PSMC4	0	1157097571	0.989	0.944	0	CTB progenitor-like
CAP1	0	1156999408	0.993	0.954	0	CTB progenitor-like
PSMC3	0	1156702393	0.509	0.101	0	SCT 1
RSL24D1	0	0.767178379	0.994	0.865	0	CTB progenitor stressed
SDCBP	0	1156110589	0.87	0.498	0	CTB progenitor
LSM8	0	1151286165	0.717	0.347	0	CTB progenitor
NONO	0	115017695	0.789	0.475	0	CTB progenitor
PAK2	0	1149814476	0.992	0.94	0	CTB progenitor-like
THOC7	0	1148493245	0.943	0.661	0	CTB progenitor
USP14	0	114792259	0.995	0.968	0	CTB progenitor-like
MRPL36	0	1146250392	0.855	0.347	0	SCT 2
FKBP4	0	0.758461995	0.994	0.956	0	CTB progenitor stressed
UCHL3	0	0.698219888	0.994	0.959	0	CTB progenitor stressed
STAU1	0	1144505026	0.998	0.979	0	CTB progenitor-like
PGLS	0	1142778667	1	0.99	0	CTB progenitor-like
RAB11A	0	1142008571	0.999	0.952	0	CTB cycling 2
ATF4	0	1140323953	0.994	0.953	0	CTB progenitor-like
RTN3	0	0.609062507	0.994	0.972	0	CTB progenitor stressed
USP10	0	1139879931	0.973	0.89	0	CTB progenitor-like
ILF3	7.28E-251	1139507509	0.924	0.538	1.32E-246	SCT 1
ENAH	0	1136466476	0.81	0.462	0	CTB progenitor
SNF8	0	1224666036	0.993	0.77	0	CTB progenitor stressed
FNBP4	0	11353818	0.982	0.906	0	CTB progenitor-like
TMEM167A	6.33E-204	1133308834	0.994	0.949	1.15E-199	CTB progenitor
VAV3	0	1132509952	0.957	0.867	0	CTB progenitor-like
BRD4	0	1208979697	0.993	0.809	0	CTB progenitor stressed
EIF4G1	0	1131843971	0.963	0.849	0	CTB progenitor-like
ACTN1	0	1127848638	0.817	0.447	0	CTB progenitor
VCL	0	0.862802239	0.993	0.946	0	CTB progenitor stressed
MRPS25	0	0.823385867	0.993	0.937	0	CTB progenitor stressed
RBM17	0	1126514971	0.834	0.516	0	CTB progenitor
2002-09-01	0	0.774882477	0.993	0.851	0	CTB progenitor stressed
MRPL18	0	1123778135	0.968	0.896	0	CTB progenitor-like
PSMC6	0	0.767855261	0.993	0.95	0	CTB progenitor stressed
G3BP1	0	1119908967	0.708	0.144	0	SCT 2
LAMB1	0	1117971808	0.805	0.487	0	CTB progenitor
AMD1	0	1117872118	0.991	0.945	0	CTB progenitor-like
TMEM147	0	1117851651	0.992	0.948	0	CTB progenitor-like
EPB41L3	0	1117390136	0.815	0.409	0	CTB progenitor
SLC44A1	0	111610887	0.999	0.984	0	CTB progenitor-like
LAMP2	0	1113952162	0.75	0.444	0	CTB 1
AHSA1	0	1110997278	0.985	0.939	0	CTB progenitor-like
STIP1	0	0.758165874	0.993	0.909	0	CTB progenitor stressed
TSTD1	0	1110829388	0.966	0.884	0	CTB progenitor-like
EPRS	0	1110311677	0.895	0.729	0	CTB progenitor-like
NDUFC1	0	1109480386	0.849	0.621	0	CTB progenitor
SBDS	0	1108734265	0.7	0.17	0	SCT 1
IDH1	0	1107094492	0.983	0.91	0	CTB progenitor-like
DDX24	0	1106746106	0.959	0.865	0	CTB progenitor-like
TMED1	0	0.68471408	0.993	0.955	0	CTB progenitor stressed
ARID3A	0	1105449777	0.668	0.149	0	SCT 1
ZNF593	0	110308188	0.692	0.268	0	CTB progenitor
ALDH7A1	0	1102191537	0.912	0.519	0	SCT 2
ATIC	6.90E-263	1101819599	0.745	0.512	1.25E-258	CTB progenitor
RAB14	0	0.674790588	0.993	0.925	0	CTB progenitor stressed
LSM2	0	1098897005	0.994	0.967	0	CTB progenitor-like
DDRGK1	0	1098631328	0.985	0.951	0	CTB progenitor-like
RPS27L	0	0.625452388	0.993	0.952	0	CTB progenitor stressed
SMIM7	0	1098238387	0.971	0.895	0	CTB progenitor-like
NDUFA2	0	1013334635	0.992	0.869	0	CTB progenitor stressed
CALD1	0	1047605649	0.991	0.923	0	CTB progenitor stressed
MPHOSPH8	0	0.879080437	0.991	0.803	0	CTB progenitor stressed
RNH1	0	0.824464989	0.991	0.894	0	CTB progenitor stressed
MRPL34	0	1093353248	0.794	0.433	0	CTB progenitor
PSMG1	0	0.864383152	0.99	0.927	0	CTB progenitor stressed
CHD1	0	109273309	0.674	0.353	0	CTB 1
H2AFY	0	0.778701187	0.99	0.844	0	CTB progenitor stressed
SF3B2	0	0.687733275	0.99	0.896	0	CTB progenitor stressed
ATP6V1F	0	0.712025957	0.989	0.892	0	CTB progenitor stressed
RAB10	0	0.794551278	0.988	0.783	0	CTB progenitor stressed
TAF7	0	0.724109099	0.988	0.775	0	CTB progenitor stressed
LIN28B	0	1084985802	0.94	0.68	0	CTB cycling 2
CD99	0	1082010525	0.999	0.991	0	CTB progenitor-like
GSPT1	0	1081918544	0.997	0.972	0	CTB progenitor-like
CDC37	0	0.705801054	0.988	0.893	0	CTB progenitor stressed
SH2D4A	0	0.575229272	0.988	0.923	0	CTB progenitor stressed
RPL7L1	0	1079539458	0.988	0.941	0	CTB progenitor-like
EXOSC8	0	1078277363	0.631	0.108	0	SCT 2
GNAI1	0	1077029297	0.752	0.356	0	CTB progenitor
LYPLA1	0	103719912	0.987	0.716	0	CTB progenitor stressed
MTPN	0	1347812961	0.986	0.686	0	CTB progenitor stressed
SMCHD1	0	1074787589	0.721	0.287	0	CTB progenitor
U2SURP	0	107451215	0.363	0.052	0	CTB 1
RBMX	0	1073926953	0.931	0.783	0	CTB progenitor-like
NARS	0	1073490951	0.824	0.515	0	CTB progenitor
EVA1B	1.38E-138	1072740232	0.703	0.562	2.50E-134	CTB progenitor
AZIN1	0	1070331725	0.999	0.984	0	CTB progenitor-like
COL4A2	0	0.779368217	0.986	0.762	0	CTB progenitor stressed
ATXN7L3B	0	1068782496	0.734	0.3	0	SCT progenitor
STRAP	0	0.511033059	0.986	0.92	0	CTB progenitor stressed
MDH1	0	1068668755	0.968	0.868	0	CTB progenitor-like
ASPH	0	1068518379	0.979	0.922	0	CTB progenitor-like
YTHDF2	0	0.838475188	0.984	0.762	0	CTB progenitor stressed
PTP4A1	0	1127666983	0.983	0.591	0	CTB progenitor stressed
EEF1E1	0	1066856055	0.763	0.35	0	CTB progenitor
C4orf3	0	1065339827	0.928	0.795	0	CTB progenitor-like
DCXR	0	1062048074	0.997	0.972	0	CTB progenitor-like
PDCD4	0	1061901694	0.717	0.3	0	CTB progenitor
TAF15	0	1087879318	0.983	0.939	0	CTB progenitor stressed
TOR1AIP2	0	0.794488473	0.983	0.826	0	CTB progenitor stressed
FAM49B	2.55E-270	106002138	0.882	0.652	4.63E-266	CTB progenitor
LIMA1	0	0.707033388	0.983	0.866	0	CTB progenitor stressed
ARF5	0	0.565237493	0.983	0.88	0	CTB progenitor stressed
CHMP2A	0	1056239339	0.981	0.883	0	CTB progenitor-like
CCT7	0	1132168063	0.982	0.639	0	CTB progenitor stressed
ROMO1	0	1054955585	0.981	0.913	0	CTB progenitor-like
HIGD2A	0	1054547085	0.937	0.804	0	CTB progenitor-like
SIAH2	0	0.951551892	0.982	0.802	0	CTB progenitor stressed
EIF4A3	0	0.76963012	0.982	0.78	0	CTB progenitor stressed
LUC7L3	0	0.567432079	0.982	0.915	0	CTB progenitor stressed
IGF2BP3	0	1050941202	0.968	0.763	0	CTB cycling 2
MRPL41	0	0.904462591	0.981	0.751	0	CTB progenitor stressed
MACF1	0	0.693268573	0.981	0.886	0	CTB progenitor stressed
TCEB1	0	0.998876376	0.98	0.668	0	CTB progenitor stressed
TIMM17A	0	1048417233	0.949	0.831	0	CTB progenitor-like
DNAJC7	0	0.831185522	0.98	0.812	0	CTB progenitor stressed
NOP10	0	0.776198662	0.98	0.858	0	CTB progenitor stressed
TXNDC17	0	0.733492213	0.98	0.79	0	CTB progenitor stressed
PSMD14	0	1045476506	0.977	0.906	0	CTB progenitor-like
ZFAND5	0	1491313335	0.979	0.505	0	CTB progenitor stressed
SLC52A2	0	1044403468	0.732	0.301	0	CTB progenitor
GTF3A	4.49E-161	1044084321	0.852	0.683	8.16E-157	CTB 1
PLCG2	0	104221182	0.972	0.892	0	CTB progenitor-like
NDUFS7	0	1042207144	0.774	0.469	0	CTB progenitor
PSMG2	0	1040632848	0.999	0.993	0	CTB progenitor-like
ABCF1	0	1087631245	0.979	0.741	0	CTB progenitor stressed
LSM5	6.69E-255	1039842539	0.848	0.346	1.21E-250	SCT 1
TARS	0	1039140183	0.989	0.935	0	CTB progenitor-like
CD2AP	0	0.800139217	0.979	0.833	0	CTB progenitor stressed
SCD	0	1036967214	0.933	0.774	0	CTB progenitor-like
CISD1	0	0.85919167	0.978	0.736	0	CTB progenitor stressed
PCBP2	0	1033706073	0.955	0.792	0	CTB progenitor-like
XPO1	0	0.79433393	0.978	0.81	0	CTB progenitor stressed
EIF3J	1.16E-237	1032020107	0.851	0.663	2.10E-233	CTB progenitor
BRD2	0	1031935015	0.721	0.318	0	CTB progenitor
ARL1	0	0.777673266	0.978	0.812	0	CTB progenitor stressed
RNPS1	0	0.748208253	0.977	0.795	0	CTB progenitor stressed
UBE2D3	0	0.630735426	0.977	0.818	0	CTB progenitor stressed
MPZL1	0	1027786361	0.856	0.595	0	CTB cycling 2
ARPC1A	0	102729078	0.894	0.553	0	CTB progenitor
PYURF	5.86E-220	102438697	0.945	0.801	1.06E-215	CTB progenitor
VPS35	7.61E-170	1023081675	0.924	0.641	1.38E-165	SCT 1
BUD31	0	1022743854	0.854	0.489	0	CTB progenitor
SNHG15	1.15E-165	1022431339	1	0.976	2.09E-161	CTB progenitor
NRDC	0	0.563456	0.976	0.888	0	CTB progenitor stressed
CHCHD1	0	1021415262	1	0.97	0	CTB cycling 2
MRPL15	2.23E-185	1020318702	0.882	0.669	4.06E-181	CTB 1
SLC16A3	0	1019277957	0.91	0.688	0	CTB progenitor
CAPZB	0	0.974110386	0.974	0.696	0	CTB progenitor stressed
RHEB	0	0.710016412	0.974	0.777	0	CTB progenitor stressed
EIF5B	0	0.619614405	0.974	0.868	0	CTB progenitor stressed
PSMD1	0	1016592653	0.94	0.809	0	CTB progenitor-like
CLTC	0	1014791055	0.998	0.983	0	CTB progenitor-like
UQCR11	0	101688484	0.973	0.663	0	CTB progenitor stressed
CLIP1	0	0.903650618	0.972	0.688	0	CTB progenitor stressed
HTATSF1	0	1014312819	0.628	0.059	0	SCT 1
XRN2	0	0.801817684	0.972	0.698	0	CTB progenitor stressed
UBE2M	0	1013391704	0.885	0.688	0	CTB progenitor-like
VPS29	0	0.74727475	0.972	0.727	0	CTB progenitor stressed
DTYMK	0	1011124025	0.972	0.675	0	CTB cycling 2
SUCLG1	0	1008951692	0.995	0.964	0	CTB progenitor-like
DNAJC21	3.67E-249	1007944202	0.814	0.618	6.67E-245	CTB progenitor
B4GALT1	0	1006174385	0.994	0.813	0	CTB cycling 2
FAM136A	0	1004964503	0.901	0.501	0	SCT 2
CAST	0	1000123646	0.843	0.543	0	CTB progenitor
VCP	0	1156600056	0.971	0.668	0	CTB progenitor stressed
SHISA5	0	0.738764458	0.971	0.715	0	CTB progenitor stressed
BAG1	0	1088930376	0.97	0.615	0	CTB progenitor stressed
ISCU	0	0.998791243	0.987	0.8	0	CTB cycling 2
C16orf13	0	0.995013606	1	0.986	0	CTB cycling 2
N4BP2L2	0	0.994518302	0.792	0.441	0	CTB progenitor
PPIG	0	0.993107014	0.775	0.47	0	CTB progenitor
GMNN	0	0.990625106	0.704	0.188	0	SCT 1
DDB1	0	0.989983356	1	0.974	0	CTB cycling 2
GGH	0	0.603778054	0.97	0.796	0	CTB progenitor stressed
YWHAH	0	0.98972376	0.939	0.81	0	CTB progenitor-like
CCNI	0	0.989117728	0.758	0.34	0	CTB progenitor
CD151	0	0.988657171	0.989	0.959	0	CTB progenitor-like
POP7	0	0.987706003	1	0.998	0	CTB progenitor-like
TCEA1	0	0.985681923	0.997	0.985	0	CTB progenitor-like
YWHAQ	0	1260683691	0.969	0.844	0	CTB progenitor stressed
HM13	0	0.983851571	0.991	0.852	0	CTB cycling 2
CPNE3	0	0.982820019	0.968	0.678	0	CTB cycling 2
GDI2	0	0.673806129	0.969	0.69	0	CTB progenitor stressed
ARL6IP1	1.84E-294	0.449948385	0.968	0.9	3.34E-290	CTB progenitor stressed
MLF2	0	1085311836	0.968	0.583	0	CTB progenitor stressed
TXNL4A	0	0.978860818	0.998	0.94	0	CTB cycling 2
ARL6IP4	0	127353633	0.967	0.464	0	CTB progenitor stressed
UBE2N	0	0.978586723	0.999	0.948	0	CTB cycling 2
SYNCRIP	0	0.978061905	0.944	0.832	0	CTB progenitor-like
RAD23A	0	1095437359	0.967	0.693	0	CTB progenitor stressed
CLN3	5.22E-238	0.976323277	0.937	0.776	9.47E-234	CTB progenitor
IMP3	0	108948313	0.967	0.701	0	CTB progenitor stressed
CARHSP1	0	0.791117486	0.967	0.718	0	CTB progenitor stressed
STT3B	0	0.973056506	1	0.974	0	CTB cycling 2
UBXN1	0	0.971069976	0.735	0.404	0	CTB progenitor
HSPA4	0	0.970448764	0.962	0.915	0	CTB progenitor-like
PDHA1	0	0.970271182	0.868	0.615	0	CTB progenitor-like
SNHG7	0	0.968214704	0.652	0.279	0	CTB progenitor
MRPS7	0	0.967925513	1	0.973	0	CTB cycling 2
SRSF4	0	0.966295346	0.924	0.771	0	CTB progenitor-like
ADH5	0	0.966243754	1	0.919	0	CTB cycling 2
EIF4A1	0	0.553342277	0.967	0.798	0	CTB progenitor stressed
C1orf122	0	0.964876036	0.932	0.81	0	CTB progenitor-like
TRIAP1	0	0.9643549	1	0.968	0	CTB cycling 2
USMG5	0	0.623323096	0.966	0.775	0	CTB progenitor stressed
MRPL11	0	1351776814	0.965	0.664	0	CTB progenitor stressed
SECISBP2L	0	0.961085997	0.986	0.923	0	CTB progenitor-like
MRPL3	0	0.771218432	0.965	0.917	0	CTB progenitor stressed
ECI2	0	0.960738028	0.73	0.2	0	SCT 2
2011-09-01	0	0.960686524	0.968	0.712	0	CTB cycling 2
PSMD12	0	0.95886292	0.623	0.098	0	SCT 2
KPNB1	1.11E-239	0.958373642	0.995	0.927	2.01E-235	CTB 1
TFG	0	0.957920622	0.986	0.806	0	CTB cycling 2
NIFK	2.48E-282	0.956313609	0.737	0.477	4.50E-278	CTB progenitor
SARAF	0	0.95552353	0.972	0.74	0	CTB cycling 2
RAB2A	1.21E-223	0.953062879	0.848	0.391	2.20E-219	SCT 1
HELLS	0	0.952755677	0.912	0.587	0	CTB cycling 2
GNG12	0	0.952554074	0.89	0.661	0	CTB progenitor-like
TIMM8B	0	0.559408046	0.965	0.807	0	CTB progenitor stressed
SMARCA5	0	0.932209918	0.964	0.756	0	CTB progenitor stressed
NDUFS8	0	0.948811745	0.999	0.961	0	CTB cycling 2
PNISR	0	0.948419732	0.799	0.471	0	CTB progenitor
EMC6	0	0.94836104	0.892	0.484	0	SCT 2
HDLBP	0	0.805275657	0.964	0.663	0	CTB progenitor stressed
MAGOH	0	0.947580903	0.86	0.62	0	CTB progenitor-like
GLA	0	0.946101695	0.691	0.19	0	SCT 1
CNBP	0	0.945101664	0.949	0.633	0	CTB cycling 2
UBE2A	0	0.888021095	0.963	0.752	0	CTB progenitor stressed
DNAJC8	0	0.831645539	0.963	0.763	0	CTB progenitor stressed
HNRNPH3	0	0.943629887	1	0.912	0	CTB cycling 2
SSU72	0	0.942965422	0.892	0.719	0	CTB progenitor-like
UBE2D2	0	0.942600416	0.963	0.896	0	CTB progenitor-like
YY1	0	0.941073351	0.986	0.748	0	CTB cycling 2
HP1BP3	0	0.940991351	0.999	0.929	0	CTB cycling 2
PGK1	0	0.939739218	1	0.957	0	CTB cycling 2
MRPL14	0	0.938432071	0.851	0.494	0	CTB progenitor
L1TD1	2.18E-295	0.937062409	0.847	0.592	3.96E-291	CTB progenitor
VAPA	0	0.936556974	0.94	0.826	0	CTB progenitor-like
PSMD4	0	0.781858527	0.962	0.697	0	CTB progenitor stressed
NDUFB4	0	0.575051099	0.962	0.775	0	CTB progenitor stressed
MRPS21	0	0.935548956	0.993	0.872	0	CTB cycling 2
ATRAID	0	0.935268115	0.923	0.773	0	CTB progenitor-like
FAM96B	0	0.934589126	0.957	0.704	0	CTB cycling 2
ASAH1	0	122193566	0.961	0.512	0	CTB progenitor stressed
SUPT16H	0	0.932637161	1	0.985	0	CTB cycling 2
REXO2	0	0.877423471	0.96	0.66	0	CTB progenitor stressed
LRP1	0	0.932354301	1	0.945	0	CTB cycling 2
COX7A2L	0	0.530220138	0.96	0.878	0	CTB progenitor stressed
DCP2	0	0.93207839	0.926	0.78	0	CTB progenitor-like
PSME2	0	0.507498929	0.96	0.899	0	CTB progenitor stressed
GLRX5	0	0.931365887	0.999	0.948	0	CTB cycling 2
TMED2	0	0.930239217	0.983	0.774	0	CTB cycling 2
ADRM1	0	0.929700607	0.864	0.642	0	CTB progenitor-like
DPP4	0	0.9284605	1	0.991	0	CTB cycling 2
TFAM	0	0.92817429	0.999	0.949	0	CTB cycling 2
VDAC3	0	0.927917478	0.704	0.323	0	CTB progenitor
AAK1	0	0.927374078	0.536	0.164	0	CTB 1
CHPF	0	0.794363663	0.959	0.662	0	CTB progenitor stressed
DAG1	0	0.925156617	0.998	0.898	0	CTB cycling 2
PMAIP1	0	0.924208798	1	0.956	0	CTB cycling 2
H2AFV	0	0.922614171	0.929	0.678	0	CTB cycling 2
DDX46	2.00E-123	0.922488235	0.641	0.392	3.64E-119	CTB 1
DLG5	0	1167189681	0.958	0.641	0	CTB progenitor stressed
TLK1	0	0.933653216	0.958	0.682	0	CTB progenitor stressed
DNAJB6	0	0.853001282	0.958	0.665	0	CTB progenitor stressed
EIF5A	0	0.921801132	0.709	0.303	0	CTB progenitor
EIF6	0	0.921484161	0.623	0.095	0	SCT 2
LAMP1	0	0.672783736	0.958	0.758	0	CTB progenitor stressed
DYNLT1	0	0.920423663	1	0.987	0	CTB cycling 2
SERINC2	0	1186257013	0.957	0.744	0	CTB progenitor stressed
FIS1	0	0.919956454	0.994	0.972	0	CTB progenitor-like
XRCC6	0	0.755448419	0.956	0.661	0	CTB progenitor stressed
TCF25	0	0.633636984	0.956	0.7	0	CTB progenitor stressed
GSTK1	0	0.919477738	0.985	0.925	0	CTB progenitor-like
ARID5B	8.34E-173	0.919320119	0.866	0.55	1.51E-168	SCT 1
DUSP5	0	1191699328	0.954	0.469	0	CTB progenitor stressed
H2AFX	0	0.918644826	1	0.99	0	CTB cycling 2
NDUFA1	0	0.932594422	0.954	0.791	0	CTB progenitor stressed
NDUFB5	0	0.9167975	0.763	0.438	0	CTB progenitor
CCNE1	0	0.629704557	0.954	0.583	0	CTB progenitor stressed
RNF7	0	0.91656619	0.999	0.967	0	CTB cycling 2
ATP6V1E1	0	1014775273	0.953	0.563	0	CTB progenitor stressed
TMEM208	0	0.756877256	0.953	0.615	0	CTB progenitor stressed
PAICS	0	0.558470078	0.953	0.836	0	CTB progenitor stressed
SIAH1	0	0.914154863	0.762	0.427	0	CTB progenitor
ACBD6	0	0.91394582	0.938	0.793	0	CTB progenitor-like
TMEM14B	0	0.87035789	0.952	0.629	0	CTB progenitor stressed
CHCHD10	0	0.913496181	1	0.919	0	CTB cycling 2
SCAND1	0	0.912851093	0.961	0.879	0	CTB progenitor-like
MYH10	0	0.859754264	0.951	0.611	0	CTB progenitor stressed
GRB2	1.20E-222	0.912391174	0.718	0.511	2.18E-218	CTB progenitor
HMGCR	0	0.777532956	0.951	0.669	0	CTB progenitor stressed
C11orf31	2.81E-286	0.91222286	0.883	0.642	5.10E-282	CTB cycling 2
SPAG9	0	0.910737666	0.739	0.403	0	CTB progenitor
SLIRP	8.02E-301	0.9105599	0.894	0.667	1.46E-296	CTB progenitor
SRP72	0	0.908899167	0.676	0.275	0	CTB progenitor
GATA3	5.22E-201	0.908743423	0.898	0.737	9.49E-197	CTB progenitor
NDUFB8	4.26E-278	0.908636249	0.739	0.257	7.73E-274	SCT 1
SLC16A1	0	0.627258845	0.951	0.814	0	CTB progenitor stressed
PSMD11	0	0.907917284	0.999	0.974	0	CTB cycling 2
PFDN2	9.64E-226	0.907479161	0.829	0.647	1.75E-221	CTB progenitor
LDLR	0	0.905843989	0.943	0.81	0	CTB progenitor-like
PPIC	0	0.571821664	0.951	0.743	0	CTB progenitor stressed
NUTF2	0	0.903770211	0.825	0.54	0	CTB progenitor-like
SURF4	0	0.649001546	0.948	0.659	0	CTB progenitor stressed
PSMB3	0	0.903456337	0.885	0.679	0	CTB progenitor-like
CIRBP	0	0.903180714	0.943	0.681	0	CTB cycling 2
TRAM1	0	1336149393	0.947	0.63	0	CTB progenitor stressed
BEX4	0	1076303397	0.946	0.526	0	CTB progenitor stressed
XBP1	0	0.902417101	0.84	0.595	0	CTB progenitor-like
CTNNAL1	0	0.900607336	0.637	0.226	0	CTB progenitor
ETFA	0	0.899003003	1	0.969	0	CTB cycling 2
AP1S1	0	0.898707094	0.656	0.245	0	CTB progenitor
SYPL1	0	0.898598322	1	0.991	0	CTB cycling 2
COMMD7	0	0.886102616	0.946	0.596	0	CTB progenitor stressed
2007-09-01	0	0.89835676	0.815	0.503	0	CTB progenitor-like
SERPINB1	0	0.898158003	0.898	0.705	0	CTB progenitor-like
BCLAF1	0	0.780084867	0.946	0.636	0	CTB progenitor stressed
PDAP1	1.93E-174	0.897499551	0.938	0.809	3.51E-170	CTB 1
LMNA	0	0.897249577	0.885	0.696	0	CTB progenitor-like
MTCH1	0	0.747577709	0.946	0.598	0	CTB progenitor stressed
CNPY2	0	0.89624962	1	0.945	0	CTB cycling 2
TMEM2	0	0.895993102	0.698	0.388	0	CTB progenitor
SEC62	0	106103517	0.945	0.464	0	CTB progenitor stressed
GTF2A2	4.16E-301	0.895564446	0.812	0.525	7.54E-297	CTB cycling 2
PRDX3	0	105345748	0.945	0.562	0	CTB progenitor stressed
THRAP3	0	0.77780367	0.945	0.643	0	CTB progenitor stressed
MAP2K2	0	0.893278703	1	0.981	0	CTB cycling 2
SMC3	0	0.892967463	0.711	0.339	0	CTB progenitor
TIMMDC1	0	0.741722638	0.945	0.67	0	CTB progenitor stressed
GRN	0	0.892108367	0.987	0.912	0	CTB progenitor-like
SEMA6A	0	0.891442389	0.895	0.68	0	CTB progenitor-like
NABP1	0	0.890944819	0.787	0.291	0	SCT progenitor
TMPO	0	0.890522541	0.996	0.876	0	CTB cycling 2
LSM3	0	1606246657	0.943	0.401	0	CTB progenitor stressed
UQCRC2	0	0.890419411	1	0.984	0	CTB cycling 2
ETF1	0	0.890094064	1	0.892	0	CTB cycling 2
KRT10	0	0.711770322	0.943	0.801	0	CTB progenitor stressed
EIF3M	0	0.889929926	0.707	0.403	0	CTB progenitor
EIF3I	0	0.680385469	0.943	0.745	0	CTB progenitor stressed
RAD23B	0	0.889132773	1	0.973	0	CTB cycling 2
AKR1B1	0	0.889063415	0.879	0.699	0	CTB progenitor-like
AP2M1	0	0.66534209	0.943	0.679	0	CTB progenitor stressed
KCNN4	0	0.887563749	0.833	0.613	0	CTB progenitor-like
ILF2	0	0.887531038	0.744	0.243	0	SCT 2
EIF1AX	0	0.887204839	0.788	0.435	0	CTB progenitor
EIF3L	0	0.887094673	0.923	0.655	0	CTB cycling 2
SOX4	0	0.590327863	0.942	0.643	0	CTB progenitor stressed
HNRNPA0	0	0.88629718	0.692	0.371	0	CTB progenitor
FAM195A	0	1067084966	0.941	0.483	0	CTB progenitor stressed
C19orf53	0	0.885765467	0.999	0.912	0	CTB cycling 2
SNHG12	7.40E-297	0.885422835	0.69	0.396	1.34E-292	CTB progenitor
HILPDA	0	0.88534079	0.999	0.942	0	CTB cycling 2
WASF2	0	0.828474619	0.941	0.648	0	CTB progenitor stressed
TMEM59	0	0.884680068	0.821	0.358	0	SCT 2
PNRC2	0	0.884633612	0.885	0.551	0	CTB cycling 2
NENF	0	0.884432712	0.995	0.971	0	CTB progenitor-like
GJA5	0	0.883596775	0.929	0.772	0	CTB progenitor-like
OCIAD1	0	0.646920028	0.941	0.693	0	CTB progenitor stressed
KTN1	0	0.921307531	0.94	0.513	0	CTB progenitor stressed
DDX17	0	0.557426032	0.94	0.747	0	CTB progenitor stressed
POLR1D	0	0.881908052	0.862	0.596	0	CTB progenitor-like
HIST1H1C	0	0.879305096	1	0.986	0	CTB cycling 2
ZC3H15	2.62E-182	0.879086429	0.733	0.545	4.76E-178	CTB progenitor
COA4	0	0.761985601	0.939	0.671	0	CTB progenitor stressed
EIF4H	0	0.878816368	0.934	0.686	0	CTB cycling 2
CSDE1	0	0.878703766	0.979	0.775	0	CTB cycling 2
SELT	0	0.710353876	0.939	0.581	0	CTB progenitor stressed
PSMC5	0	0.877357166	0.923	0.634	0	CTB cycling 2
ANAPC11	0	0.877245119	1	0.97	0	CTB cycling 2
OLA1	0	0.876419761	0.796	0.447	0	CTB progenitor
NSA2	3.09E-164	0.318271041	0.938	0.884	5.60E-160	CTB progenitor stressed
TMEM258	0	0.875365194	0.997	0.828	0	SCT 2
TCEB2	0	0.87525448	1	0.993	0	CTB cycling 2
SLC26A2	0	0.875251898	0.793	0.277	0	SCT progenitor
ISM2	0	1179870081	0.938	0.414	0	CTB progenitor stressed
CPVL	0	0.873256916	0.986	0.794	0	CTB cycling 2
SNRPA1	0	0.872920327	0.985	0.82	0	CTB cycling 2
ATP6AP2	1.68E-223	0.872901017	0.383	0.082	3.05E-219	SCT 1
PRPF4B	0	0.602083046	0.938	0.649	0	CTB progenitor stressed
MRPL20	0	0.843639672	0.936	0.513	0	CTB progenitor stressed
ARPC5L	0	0.871603862	0.881	0.656	0	CTB progenitor-like
EPB41L4A-AS1	0	2304807512	0.934	0.461	0	CTB progenitor stressed
PSMA1	0	128706123	0.934	0.445	0	CTB progenitor stressed
TENM3	0	0.634073707	0.933	0.782	0	CTB progenitor stressed
HEBP2	0	1105972858	0.932	0.463	0	CTB progenitor stressed
NRP2	1.52E-268	0.869235962	0.985	0.902	2.77E-264	CTB cycling 2
DDX21	0	0.869230268	1	0.976	0	CTB cycling 2
PDIA4	2.40E-278	0.8691459	0.97	0.82	4.36E-274	CTB cycling 2
ENSA	0	0.868690761	0.721	0.393	0	CTB progenitor
LEPROT	1.18E-300	0.868107803	0.994	0.891	2.14E-296	CTB cycling 2
MAP1LC3B	0	0.867927833	0.666	0.329	0	CTB progenitor
SRP9	0	0.866409913	0.993	0.84	0	CTB cycling 2
BAX	0	0.765375879	0.932	0.614	0	CTB progenitor stressed
EIF3D	0	0.866001674	0.646	0.136	0	SCT 2
PPM1G	0	0.864758793	0.95	0.844	0	CTB progenitor-like
ZNF706	0	1754405888	0.931	0.394	0	CTB progenitor stressed
ITM2C	0	1181464821	0.93	0.457	0	CTB progenitor stressed
RSRC2	0	0.853712549	0.929	0.504	0	CTB progenitor stressed
ENY2	0	0.543639266	0.928	0.804	0	CTB progenitor stressed
CUTA	0	1301112819	0.927	0.502	0	CTB progenitor stressed
ELF3	8.98E-250	0.862307607	0.811	0.544	1.63E-245	CTB progenitor
PARP1	2.08E-05	0.862124196	0.378	0.458	0.37769061	CTB 1
TXNL1	1.54E-290	0.861842659	0.984	0.864	2.79E-286	CTB cycling 2
NUDC	0	119719558	0.927	0.458	0	CTB progenitor stressed
FBN1	0	1469747063	0.926	0.436	0	CTB progenitor stressed
VIMP	0	0.770165527	0.926	0.587	0	CTB progenitor stressed
KPNA2	0	0.721740716	0.926	0.596	0	CTB progenitor stressed
TECR	5.16E-306	0.859446312	0.979	0.763	9.37E-302	CTB cycling 2
H2AFJ	9.67E-265	0.859234004	0.445	0.184	1.76E-260	CTB 1
PCBP1	0	0.60456677	0.924	0.645	0	CTB progenitor stressed
ERH	0	0.859171237	0.622	0.123	0	SCT 2
CDV3	0	0.654773389	0.923	0.7	0	CTB progenitor stressed
ADM	4.41E-276	0.857922405	0.798	0.546	8.00E-272	CTB progenitor
MRPL27	4.80E-243	0.857728836	0.841	0.564	8.72E-239	CTB cycling 2
PPP1R15A	0	0.857181375	0.999	0.918	0	CTB cycling 2
ZFP36L1	0	0.559241681	0.923	0.698	0	CTB progenitor stressed
PRMT1	0	0.856491883	0.878	0.66	0	CTB progenitor-like
ORMDL1	0	0.466286404	0.923	0.707	0	CTB progenitor stressed
SRM	0	1068669923	0.922	0.47	0	CTB progenitor stressed
HMGB3	0	0.854504731	0.94	0.806	0	CTB progenitor-like
PABPC4	0	2513139228	0.921	0.336	0	CTB progenitor stressed
RBM25	0	0.796513285	0.921	0.611	0	CTB progenitor stressed
BZW1	0	0.769043766	0.921	0.619	0	CTB progenitor stressed
PSMB7	0	0.852408364	0.862	0.436	0	SCT 2
KHDRBS1	0	0.852008111	0.855	0.603	0	CTB progenitor-like
MRPL4	0	0.719379562	0.921	0.687	0	CTB progenitor stressed
FKBP3	0	0.851262992	0.866	0.613	0	CTB progenitor-like
ITGA6	1.02E-285	0.851180283	0.878	0.627	1.84E-281	CTB cycling 2
GHITM	0	0.622536356	0.921	0.739	0	CTB progenitor stressed
ATP5H	0	0.850112743	0.606	0.23	0	CTB progenitor
ARL4A	2.81E-299	0.849913448	0.815	0.55	5.09E-295	CTB progenitor
CEBPB	0	0.849580117	0.902	0.727	0	CTB progenitor-like
DDIT3	0	0.848253755	0.836	0.535	0	CTB progenitor-like
NDUFA10	0	0.847805363	0.595	0.136	0	SCT 1
LAMTOR5	0	0.53501138	0.92	0.703	0	CTB progenitor stressed
AKAP9	0	1170959488	0.919	0.476	0	CTB progenitor stressed
COX20	0	0.97713341	0.919	0.539	0	CTB progenitor stressed
MCFD2	0	0.847112648	0.835	0.563	0	CTB progenitor-like
HADHA	0	0.775166974	0.919	0.576	0	CTB progenitor stressed
KIF5B	0	0.475571131	0.919	0.818	0	CTB progenitor stressed
POLR2H	0	0.846723736	0.686	0.326	0	CTB progenitor
DYNC1H1	0	0.846618764	0.907	0.742	0	CTB progenitor-like
RABAC1	0	0.846488986	0.949	0.871	0	CTB progenitor-like
NDUFA6	1.01E-286	0.411220925	0.917	0.815	1.84E-282	CTB progenitor stressed
ETFB	0	0.845600171	0.998	0.913	0	CTB cycling 2
NUFIP2	0	0.844320185	0.917	0.625	0	CTB progenitor stressed
C9orf142	0	0.845248935	1	0.969	0	CTB cycling 2
SSB	0	0.844904429	0.904	0.593	0	CTB cycling 2
C19orf48	0	0.844515271	0.886	0.558	0	CTB cycling 2
PRPF40A	0	0.744737414	0.915	0.546	0	CTB progenitor stressed
TXNRD1	0	0.636985074	0.915	0.712	0	CTB progenitor stressed
MORF4L2	0	0.607428733	0.915	0.641	0	CTB progenitor stressed
WDR83OS	8.21E-292	0.843432622	0.958	0.73	1.49E-287	CTB cycling 2
BNIP3	0	0.843118984	0.987	0.945	0	CTB progenitor-like
RHOB	2.49E-252	0.842804829	0.958	0.82	4.52E-248	CTB progenitor
SF3B5	1.68E-231	0.842075695	0.88	0.705	3.06E-227	CTB 1
MPP1	1.78E-121	0.840629792	0.888	0.841	3.23E-117	CTB progenitor
TOMM40	0	0.839613526	0.619	0.118	0	SCT 2
ISYNA1	0	0.839477843	1	0.957	0	CTB cycling 2
SF3B6	0	0.597720017	0.915	0.592	0	CTB progenitor stressed
SNRPF	0	0.8391128	0.969	0.752	0	CTB cycling 2
RPS19BP1	8.81E-273	0.839015592	0.763	0.487	1.60E-268	CTB progenitor
SF3B1	0	0.807924768	0.914	0.624	0	CTB progenitor stressed
ADI1	0	0.838407309	0.891	0.717	0	CTB progenitor-like
SRPK1	0	0.837699106	0.879	0.657	0	CTB progenitor-like
APMAP	0	0.76789811	0.913	0.869	0	CTB progenitor stressed
CSNK1A1	0	0.837474581	0.996	0.898	0	CTB cycling 2
STRA13	1.04E-258	0.837352963	0.753	0.252	1.88E-254	SCT 1
TM9SF3	9.79E-307	0.837168815	0.674	0.376	1.78E-302	CTB progenitor
UFC1	0	0.836984192	0.907	0.616	0	CTB cycling 2
MRPS34	7.99E-266	0.836777513	0.701	0.398	1.45E-261	CTB progenitor
MRPS12	0	0.609129565	0.913	0.669	0	CTB progenitor stressed
DDT	1.34E-279	0.836273875	0.892	0.666	2.43E-275	CTB cycling 2
SRSF10	0	0.777120081	0.911	0.685	0	CTB progenitor stressed
NDUFA12	0	0.835294772	0.689	0.317	0	CTB progenitor
AHNAK	0	0.835139137	0.993	0.874	0	CTB cycling 2
CYSTM1	0	0.83502318	0.889	0.668	0	CTB progenitor-like
CD55	5.17E-209	0.835012649	0.815	0.358	9.38E-205	SCT 1
LAMTOR1	0	0.833648915	0.837	0.577	0	CTB progenitor-like
TCP1	0	0.706942133	0.911	0.575	0	CTB progenitor stressed
EIF2AK1	0	0.645723761	0.911	0.605	0	CTB progenitor stressed
SUZ12	0	0.746083687	0.91	0.599	0	CTB progenitor stressed
SRRM1	1.89E-241	0.832089101	0.971	0.841	3.44E-237	CTB cycling 2
CHPT1	0	0.765695494	0.909	0.551	0	CTB progenitor stressed
DNAJA2	0	0.694688656	0.909	0.581	0	CTB progenitor stressed
IQGAP1	0	0.596534408	0.909	0.632	0	CTB progenitor stressed
MEST	1.67E-196	0.830517349	0.879	0.423	3.02E-192	SCT 1
HNRNPH1	4.57E-285	0.829789748	0.935	0.706	8.30E-281	CTB cycling 2
PPDPF	0	0.863187707	0.908	0.644	0	CTB progenitor stressed
NOP56	0	0.82018109	0.908	0.669	0	CTB progenitor stressed
EIF4B	1.68E-304	0.828345826	0.983	0.79	3.06E-300	CTB cycling 2
CDH1	2.75E-257	0.827924841	0.987	0.892	4.99E-253	CTB cycling 2
HNRNPF	0	0.827871858	0.992	0.948	0	CTB progenitor-like
ERVH48-1	6.94E-239	0.827718912	0.464	0.211	1.26E-234	CTB 1
TMED10	0	0.827680968	0.747	0.367	0	CTB progenitor
AKR7A2	0	0.827135515	0.861	0.648	0	CTB progenitor-like
ARGLU1	0	0.827088805	0.712	0.397	0	CTB progenitor
NOL7	7.51E-239	0.827052558	0.94	0.747	1.36E-234	CTB cycling 2
UBL5	0	0.827038346	0.879	0.669	0	CTB progenitor-like
OST4	0	0.826855979	0.887	0.72	0	CTB progenitor-like
DEGS1	0	0.6397668	0.908	0.63	0	CTB progenitor stressed
ACP1	0	0.826643267	0.81	0.505	0	CTB progenitor-like
ANP32A	0	0.600651054	0.908	0.602	0	CTB progenitor stressed
IDH2	0	1633399609	0.907	0.424	0	CTB progenitor stressed
CLIC3	0	0.680887637	0.907	0.529	0	CTB progenitor stressed
ECH1	0	0.824607593	0.477	0.101	0	CTB 1
MSMO1	0	0.635157087	0.907	0.619	0	CTB progenitor stressed
SNRPD3	0	0.609244417	0.907	0.6	0	CTB progenitor stressed
CSTB	0	0.602315259	0.907	0.568	0	CTB progenitor stressed
GADD45GIP1	3.04E-260	0.824046742	0.909	0.656	5.52E-256	CTB cycling 2
UGP2	0	0.663498732	0.906	0.735	0	CTB progenitor stressed
CCT8	0	0.823076116	0.982	0.944	0	CTB progenitor-like
EIF4A2	0	0.654248361	0.906	0.608	0	CTB progenitor stressed
PDCD5	1.87E-296	0.822744201	0.98	0.814	3.40E-292	CTB cycling 2
TIMP3	1.93E-295	0.822599047	0.976	0.805	3.51E-291	CTB cycling 2
MDM2	0	0.822594184	0.925	0.754	0	CTB progenitor-like
CMTM6	0	0.822329547	0.781	0.473	0	CTB progenitor
HN1	0	0.847566768	0.905	0.561	0	CTB progenitor stressed
CYC1	0	0.822045584	0.836	0.564	0	CTB progenitor-like
SRSF11	1.07E-175	0.821932377	0.669	0.464	1.93E-171	CTB progenitor
NDUFS6	2.61E-299	0.821857065	0.995	0.901	4.74E-295	CTB cycling 2
BASP1	0	0.746027939	0.905	0.54	0	CTB progenitor stressed
NR2F6	0	0.82115356	0.254	0.054	0	CTB progenitor-like
C14orf166	0	0.465576891	0.905	0.67	0	CTB progenitor stressed
LRP2	0	0.820313433	0.924	0.762	0	CTB progenitor-like
TPM3	0	0.821797108	0.904	0.523	0	CTB progenitor stressed
HSPA9	0	0.818881699	0.844	0.59	0	CTB progenitor-like
PNP	0	0.520717478	0.904	0.668	0	CTB progenitor stressed
HSPB1	0	1100319537	0.903	0.475	0	CTB progenitor stressed
EIF3E	0	0.818241014	1	0.963	0	CTB cycling 2
JTB	0	1375070941	0.902	0.442	0	CTB progenitor stressed
CNN3	0	0.817462191	0.805	0.466	0	CTB progenitor-like
BCAP31	0	0.816563079	0.888	0.697	0	CTB progenitor-like
PKM	8.58E-293	0.815905924	0.932	0.685	1.56E-288	CTB cycling 2
GUK1	2.81E-303	0.815888667	0.944	0.678	5.09E-299	CTB cycling 2
SPCS3	3.20E-120	0.815589918	0.725	0.546	5.82E-116	CTB 1
ITGAV	2.76E-259	0.815237311	0.996	0.923	5.01E-255	CTB cycling 2
STOML2	0	0.814673845	0.843	0.58	0	CTB progenitor-like
APEX1	0	0.644706829	0.902	0.532	0	CTB progenitor stressed
CD59	0	0.813849857	0.854	0.6	0	CTB progenitor-like
PDCD6	0	0.813402188	0.938	0.691	0	SCT 2
DSC2	0	0.812705858	0.945	0.858	0	CTB progenitor-like
YWHAE	0	0.811912227	0.857	0.636	0	CTB progenitor-like
COPE	3.66E-216	0.81188458	0.972	0.808	6.65E-212	CTB cycling 2
UBE2L3	2.32E-160	0.338716022	0.901	0.837	4.21E-156	CTB progenitor stressed
FDFT1	1.57E-135	0.279842047	0.899	0.817	2.85E-131	CTB progenitor stressed
PGAM1	2.86E-246	0.810907913	0.916	0.719	5.20E-242	CTB cycling 2
PSMA4	0	0.810732072	0.639	0.327	0	CTB progenitor
TBCA	0	0.890439429	0.899	0.744	0	CTB progenitor stressed
TXN2	0	0.810445394	0.796	0.451	0	CTB progenitor-like
PSMD7	0	0.810318809	0.782	0.423	0	CTB progenitor-like
INSIG1	2.68E-295	0.810282675	0.806	0.521	4.86E-291	CTB cycling 2
ACADVL	2.87E-304	0.810126503	0.865	0.531	5.21E-300	CTB cycling 2
NDUFS5	0	0.810044136	0.996	0.86	0	CTB cycling 2
BRI3	1.50E-303	0.809906112	0.955	0.686	2.72E-299	CTB cycling 2
CCNB1	1.44E-275	0.809642018	0.883	0.626	2.61E-271	CTB cycling 2
POLR2L	0	0.809599439	0.814	0.493	0	CTB progenitor-like
PSMA5	0	0.80936196	0.327	0.052	0	SCT 2
IDI1	5.19E-273	0.808853476	0.966	0.785	9.42E-269	CTB cycling 2
SDF2L1	0	0.853433823	0.899	0.51	0	CTB progenitor stressed
CALU	7.42E-279	0.808231991	0.949	0.732	1.35E-274	CTB cycling 2
RBX1	0	0.799097397	0.899	0.615	0	CTB progenitor stressed
NDUFC2	0	0.807357438	0.865	0.606	0	CTB cycling 2
HSBP1	0	0.523063006	0.898	0.612	0	CTB progenitor stressed
TMED4	0	0.80690299	0.805	0.488	0	CTB progenitor-like
PAPOLA	0	1140125472	0.897	0.492	0	CTB progenitor stressed
RBBP7	0	0.80584117	0.886	0.66	0	CTB progenitor-like
NDUFB11	0	0.805715169	0.876	0.511	0	SCT 2
FDX1	0	1045130158	0.896	0.482	0	CTB progenitor stressed
UQCRB	0	0.847648599	0.896	0.504	0	CTB progenitor stressed
NUCKS1	0	0.714890878	0.895	0.514	0	CTB progenitor stressed
C19orf43	1.55E-251	0.804294942	0.87	0.601	2.82E-247	CTB cycling 2
C11orf58	0	1052193575	0.894	0.516	0	CTB progenitor stressed
SLC40A1	0	0.78335278	0.894	0.52	0	CTB progenitor stressed
ATP6V1G1	0	0.803941651	0.814	0.515	0	CTB progenitor-like
RCN2	0	0.572641821	0.894	0.611	0	CTB progenitor stressed
PCMT1	0	2678665271	0.893	0.277	0	CTB progenitor stressed
VGLL1	0	1029068509	0.893	0.44	0	CTB progenitor stressed
CACYBP	0	0.801848885	0.656	0.167	0	SCT 1
UBE2I	0	0.846393517	0.893	0.669	0	CTB progenitor stressed
FAM89A	0	0.801125972	0.611	0.26	0	CTB progenitor
LMO4	0	0.800498065	0.996	0.858	0	CTB cycling 2
COX7B	0	134535191	0.892	0.426	0	CTB progenitor stressed
FOSB	1.75E-166	0.800160954	0.709	0.502	3.18E-162	CTB 1
SMS	0	0.741530376	0.892	0.546	0	CTB progenitor stressed
EIF3H	0	0.800133622	0.859	0.637	0	CTB progenitor-like
MRPS26	4.26E-273	0.800038084	0.984	0.804	7.73E-269	CTB cycling 2
SLC38A2	0	0.737352148	0.892	0.602	0	CTB progenitor stressed
CCT4	1.26E-287	0.799336819	0.831	0.528	2.29E-283	CTB cycling 2
SNX6	0	1136353502	0.891	0.397	0	CTB progenitor stressed
UBE2B	0	0.799087917	0.852	0.612	0	CTB progenitor-like
TBX3	0	0.519605133	0.891	0.619	0	CTB progenitor stressed
SIVA1	0	0.798605872	0.842	0.606	0	CTB progenitor-like
SLC43A2	0	0.675149127	0.89	0.508	0	CTB progenitor stressed
ARF1	0	0.797643079	0.989	0.977	0	CTB progenitor-like
ATP5J2	0	0.630104831	0.89	0.59	0	CTB progenitor stressed
DAD1	3.11E-294	0.797581555	0.709	0.417	5.65E-290	CTB progenitor
STMN1	0	0.797552153	0.794	0.467	0	CTB progenitor-like
RCN1	0	0.798087079	0.889	0.488	0	CTB progenitor stressed
GGCT	1.44E-294	0.372843263	0.888	0.697	2.61E-290	CTB progenitor stressed
PTTG1IP	0	0.897565098	0.888	0.497	0	CTB progenitor stressed
SON	0	0.685003164	0.888	0.584	0	CTB progenitor stressed
ARF4	0	0.66318408	0.888	0.671	0	CTB progenitor stressed
HNRNPK	0	0.7945953	0.677	0.223	0	SCT 2
TIMM13	0	0.656475982	0.888	0.533	0	CTB progenitor stressed
FKBP2	0	0.618892306	0.888	0.574	0	CTB progenitor stressed
MANF	0	0.55889263	0.887	0.654	0	CTB progenitor stressed
PSMB2	0	0.519101025	0.886	0.666	0	CTB progenitor stressed
EID1	0	0.794224481	0.785	0.323	0	SCT 2
COX6B1	0	0.83211807	0.885	0.543	0	CTB progenitor stressed
NRK	0	0.792207439	0.915	0.686	0	CTB progenitor-like
ATP2B1	6.50E-244	0.792109726	0.984	0.873	1.18E-239	CTB cycling 2
LSM4	0	0.79208112	0.818	0.497	0	CTB progenitor-like
ATP5A1	2.53E-294	0.791754173	0.842	0.549	4.60E-290	CTB cycling 2
TYMS	0	0.824506136	0.885	0.486	0	CTB progenitor stressed
YBX3	0	0.790869224	0.788	0.438	0	CTB progenitor-like
PHB2	0	0.790858213	0.64	0.297	0	CTB progenitor
HMOX1	0	0.790539644	0.839	0.593	0	CTB progenitor-like
MLEC	0	0.787655734	0.885	0.534	0	CTB progenitor stressed
LY6E	0	0.790497618	0.938	0.617	0	CTB cycling 2
TMEM14C	0	0.789796031	0.867	0.666	0	CTB progenitor-like
WSB1	0	0.515781166	0.885	0.607	0	CTB progenitor stressed
NUDT4	0	0.931749521	0.884	0.52	0	CTB progenitor stressed
C14orf2	0	0.788377166	0.603	0.228	0	CTB progenitor
NCOA3	0	0.765439743	0.883	0.572	0	CTB progenitor stressed
RSL1D1	3.05E-269	0.787533225	0.996	0.926	5.54E-265	CTB cycling 2
LSM7	3.10E-239	0.787432258	0.677	0.419	5.63E-235	CTB progenitor
PA2G4	0	0.616286159	0.883	0.578	0	CTB progenitor stressed
CKS1B	0	0.787122581	0.996	0.896	0	CTB cycling 2
NME1	0	0.786941089	0.892	0.693	0	CTB progenitor-like
MORF4L1	0	0.786547681	0.844	0.549	0	CTB cycling 2
UQCRFS1	0	0.9362163	0.882	0.438	0	CTB progenitor stressed
MRPL57	0	0.882950566	0.882	0.598	0	CTB progenitor stressed
HACD3	0	0.681478644	0.882	0.645	0	CTB progenitor stressed
HNRNPM	0	0.576299768	0.881	0.659	0	CTB progenitor stressed
CD81	2.34E-246	0.7851558	0.682	0.426	4.25E-242	CTB cycling 2
BZW2	0	0.784718596	0.866	0.662	0	CTB progenitor-like
SHFM1	0	0.783488781	0.869	0.626	0	CTB progenitor-like
NDUFB2	0	0.78342116	0.816	0.538	0	CTB progenitor-like
GOLGB1	0	1399545617	0.88	0.463	0	CTB progenitor stressed
NAP1L1	0	0.783145629	0.822	0.511	0	CTB progenitor-like
MRFAP1	0	0.782554589	0.789	0.473	0	CTB cycling 2
TPM4	6.15E-202	0.782498821	0.409	0.185	1.12E-197	CTB 1
COX8A	6.11E-225	0.782398806	0.668	0.225	1.11E-220	SCT 1
PNN	0	0.777483249	0.88	0.541	0	CTB progenitor stressed
MRPS15	0	130259515	0.879	0.366	0	CTB progenitor stressed
UQCRQ	0	123164687	0.879	0.367	0	CTB progenitor stressed
EDF1	0	0.78128772	0.806	0.468	0	CTB progenitor-like
KDELR2	0	1050393353	0.879	0.489	0	CTB progenitor stressed
EIF3G	0	0.999224815	0.879	0.472	0	CTB progenitor stressed
RPS20	0	0.780530296	0.903	0.606	0	CTB cycling 2
ATP5B	0	0.78036554	0.45	0.068	0	SCT 2
LMAN2	0	0.982760792	0.879	0.376	0	CTB progenitor stressed
SLC27A2	0	0.780055284	0.806	0.487	0	CTB progenitor-like
CD164	2.33E-258	0.780014166	0.865	0.595	4.23E-254	CTB cycling 2
TRMT112	1.11E-264	0.779508817	0.883	0.6	2.02E-260	CTB cycling 2
RBM3	0	0.915079588	0.879	0.529	0	CTB progenitor stressed
SRSF5	6.02E-254	0.778784816	0.75	0.498	1.09E-249	CTB progenitor
PSMB5	3.46E-238	0.778720304	0.998	0.954	6.29E-234	CTB cycling 2
SNRPD2	0	0.62871002	0.879	0.581	0	CTB progenitor stressed
TGM2	7.01E-278	0.778464381	0.804	0.514	1.27E-273	CTB progenitor
TPR	3.81E-205	0.778430497	0.771	0.536	6.92E-201	CTB progenitor
COX5B	0	0.731878411	0.877	0.48	0	CTB progenitor stressed
RER1	0	0.570227657	0.877	0.597	0	CTB progenitor stressed
TOMM7	0	0.554478224	0.877	0.612	0	CTB progenitor stressed
CBX3	0	0.531895599	0.877	0.598	0	CTB progenitor stressed
PHPT1	0	0.874975931	0.876	0.509	0	CTB progenitor stressed
NFKBIA	0	0.605276062	0.876	0.519	0	CTB progenitor stressed
RASA1	0	0.927206883	0.875	0.487	0	CTB progenitor stressed
DUT	0	0.915560158	0.875	0.469	0	CTB progenitor stressed
PCOLCE2	0	0.729750519	0.875	0.472	0	CTB progenitor stressed
HNRNPC	0	0.559341647	0.875	0.581	0	CTB progenitor stressed
MIF	0	0.762678666	0.873	0.509	0	CTB progenitor stressed
PABPC1	8.72E-263	0.775085433	0.912	0.666	1.58E-258	CTB cycling 2
MDH2	0	0.53577937	0.873	0.52	0	CTB progenitor stressed
SNRPE	2.17E-205	0.774756249	0.709	0.282	3.95E-201	SCT 1
EIF3F	0	0.77460934	0.904	0.733	0	CTB progenitor-like
SPCS1	9.19E-292	0.774591363	0.84	0.54	1.67E-287	CTB cycling 2
CYCS	0	1040355772	0.872	0.352	0	CTB progenitor stressed
ATPIF1	1.78E-247	0.334011977	0.871	0.672	3.24E-243	CTB progenitor stressed
MORC4	4.54E-279	0.774121641	0.796	0.481	8.24E-275	CTB cycling 2
S100A6	1.75E-302	0.34738474	0.868	0.631	3.17E-298	CTB progenitor stressed
NEDD8	0	0.773980921	0.844	0.577	0	CTB progenitor-like
SRSF9	0	0.86061924	0.868	0.495	0	CTB progenitor stressed
TCAF1	0	0.772399001	0.805	0.513	0	CTB progenitor-like
MRPL51	0	0.542282202	0.868	0.575	0	CTB progenitor stressed
ST13	1.03E-304	0.771745904	0.82	0.515	1.87E-300	CTB cycling 2
ITIH5	0	0.502764008	0.868	0.583	0	CTB progenitor stressed
CSRP2	0	0.882901024	0.867	0.46	0	CTB progenitor stressed
SERP1	0	0.595378314	0.866	0.563	0	CTB progenitor stressed
RPS21	0	0.401100218	0.866	0.614	0	CTB progenitor stressed
REEP5	0	0.83663267	0.865	0.67	0	CTB progenitor stressed
FUS	0	0.583372414	0.865	0.581	0	CTB progenitor stressed
UBXN4	0	0.769498998	0.644	0.211	0	SCT 2
SSR3	0	0.769425205	0.905	0.655	0	CTB progenitor-like
PKIB	0	0.872209304	0.864	0.449	0	CTB progenitor stressed
SNRPG	0	1260886669	0.863	0.319	0	CTB progenitor stressed
SEPW1	9.43E-295	0.768976377	0.852	0.56	1.71E-290	CTB progenitor
PPP1R14B	1.96E-181	0.7686979	0.812	0.387	3.55E-177	SCT 1
SLC39A1	0	0.768627764	0.975	0.704	0	CTB cycling 2
EIF2S2	0	0.768519632	0.581	0.224	0	CTB progenitor
NDUFAB1	0	0.917260705	0.863	0.434	0	CTB progenitor stressed
ERVW-1	0	0.459352255	0.863	0.559	0	CTB progenitor stressed
NDUFB10	1.04E-239	0.767694672	0.933	0.721	1.89E-235	CTB cycling 2
SNX3	0	0.622316822	0.862	0.53	0	CTB progenitor stressed
CCDC47	0	0.797375681	0.861	0.513	0	CTB progenitor stressed
DDX3X	0	0.703550793	0.861	0.659	0	CTB progenitor stressed
MYL6	1.25E-268	0.767047701	0.871	0.627	2.27E-264	CTB cycling 2
PEG3	0	0.623753003	0.86	0.527	0	CTB progenitor stressed
BTG3	2.06E-262	0.766502506	0.893	0.633	3.73E-258	CTB cycling 2
PHB	9.96E-305	0.766410376	0.985	0.786	1.81E-300	CTB cycling 2
SNU13	0	1252030859	0.859	0.356	0	CTB progenitor stressed
CCT2	0	0.470555151	0.858	0.592	0	CTB progenitor stressed
ATP6V0E1	0	0.765667049	0.8	0.446	0	CTB progenitor-like
RPL38	7.21E-193	0.331154928	0.857	0.78	1.31E-188	CTB progenitor stressed
SFPQ	0	0.649128464	0.857	0.51	0	CTB progenitor stressed
POMP	0	0.765024482	0.612	0.149	0	SCT 1
COX7A2	0	0.764381501	0.785	0.434	0	CTB progenitor-like
AURKAIP1	0	0.764277791	0.525	0.138	0	CTB progenitor
HNRNPD	0	0.76415434	0.945	0.815	0	CTB progenitor-like
DSTN	0	1094903719	0.855	0.349	0	CTB progenitor stressed
TAF1D	0	0.764108289	0.882	0.668	0	CTB progenitor-like
PRKDC	0	0.919748987	0.855	0.458	0	CTB progenitor stressed
TALDO1	0	0.763735241	0.841	0.512	0	CTB cycling 2
SMAGP	0	0.762969998	0.604	0.25	0	CTB progenitor
DEK	0	0.826323185	0.855	0.442	0	CTB progenitor stressed
APP	0	0.762279454	0.778	0.466	0	CTB cycling 2
CST3	0	0.762244047	0.819	0.527	0	CTB progenitor-like
VAMP8	0	0.760051198	0.855	0.528	0	CTB progenitor stressed
TUFM	0	0.722997519	0.855	0.572	0	CTB progenitor stressed
RHOA	0	0.761691985	0.549	0.091	0	SCT 2
NDUFB9	0	0.761678159	0.865	0.646	0	CTB progenitor-like
XAGE2	0	0.761493453	0.784	0.431	0	CTB progenitor-like
SEC61B	0	0.69473245	0.855	0.7	0	CTB progenitor stressed
MYL12A	6.24E-113	0.267850799	0.854	0.806	1.13E-108	CTB progenitor stressed
CKS2	0	0.761327257	0.871	0.649	0	CTB progenitor-like
HMGN3	0	0.761129752	0.839	0.573	0	CTB progenitor-like
EEF2	0	0.761033596	0.88	0.704	0	CTB progenitor-like
QPRT	0	0.789139402	0.854	0.503	0	CTB progenitor stressed
MLLT1	1.50E-210	0.760673528	0.956	0.788	2.72E-206	CTB cycling 2
RTN4	0	0.547421625	0.854	0.582	0	CTB progenitor stressed
SSBP1	0	0.760001341	0.717	0.383	0	CTB 1
PSMD8	0	0.759958799	0.852	0.569	0	CTB progenitor-like
FDPS	0	0.688994865	0.853	0.503	0	CTB progenitor stressed
COX6C	0	0.759476225	0.632	0.279	0	CTB progenitor
ATP5J	6.83E-242	0.759277753	0.923	0.714	1.24E-237	CTB cycling 2
GPX4	0	0.758941949	0.69	0.363	0	CTB progenitor
TOP1	0	0.604310111	0.853	0.51	0	CTB progenitor stressed
DUSP9	0	0.535271034	0.853	0.562	0	CTB progenitor stressed
WBP5	7.52E-248	0.757547969	0.713	0.436	1.36E-243	CTB progenitor
TMA7	0	0.757478798	0.949	0.876	0	CTB progenitor-like
VWA1	0	0.518087569	0.853	0.558	0	CTB progenitor stressed
YWHAZ	4.20E-251	0.318879582	0.852	0.638	7.62E-247	CTB progenitor stressed
FBN2	5.45E-303	0.75668324	0.845	0.531	9.89E-299	CTB cycling 2
CYB5A	0	104903361	0.852	0.422	0	CTB progenitor stressed
ATP5D	0	0.890060582	0.852	0.408	0	CTB progenitor stressed
ATP5G2	0	0.756104698	0.598	0.273	0	CTB progenitor
RBM39	0	0.767467849	0.852	0.498	0	CTB progenitor stressed
SOD1	0	0.544057616	0.852	0.507	0	CTB progenitor stressed
JUND	0	0.755352647	0.765	0.441	0	CTB progenitor
SLC38A1	0	0.755330753	0.904	0.606	0	CTB cycling 2
EEF1D	2.09E-216	0.755330054	0.987	0.901	3.80E-212	CTB cycling 2
ATP1B3	0	0.530088418	0.852	0.6	0	CTB progenitor stressed
ARPC3	0	0.753965176	0.804	0.498	0	CTB progenitor-like
ECHS1	0	0.7539225	0.889	0.698	0	CTB progenitor-like
ALDOA	0	0.753861561	0.867	0.592	0	CTB progenitor-like
SLC2A1	0	114615152	0.851	0.386	0	CTB progenitor stressed
ATP6V0B	0	0.753579294	0.533	0.092	0	SCT 1
CCNL1	1.40E-246	0.753353455	0.85	0.574	2.54E-242	CTB cycling 2
HMGN1	0	0.650668494	0.851	0.515	0	CTB progenitor stressed
SUMO2	0	0.752802075	0.878	0.665	0	CTB progenitor-like
NUCB2	3.32E-271	0.752724622	0.845	0.598	6.04E-267	CTB cycling 2
PGP	9.31E-306	0.752688599	0.67	0.335	1.69E-301	CTB progenitor
CTSC	0	0.591497727	0.851	0.484	0	CTB progenitor stressed
MPC2	7.17E-300	0.752180061	0.86	0.552	1.30E-295	CTB cycling 2
PRDX6	8.95E-259	0.752163138	0.906	0.647	1.63E-254	CTB cycling 2
APRT	0	0.75209786	0.806	0.488	0	CTB progenitor-like
NDUFV2	1.13E-220	0.752075229	0.89	0.678	2.05E-216	CTB cycling 2
TUBB4B	3.66E-292	0.751996392	0.83	0.532	6.65E-288	CTB cycling 2
XRCC5	0	0.751787184	0.837	0.496	0	CTB cycling 2
SNRPD1	0	0.485793472	0.85	0.565	0	CTB progenitor stressed
SPCS2	2.66E-290	0.395823627	0.849	0.633	4.83E-286	CTB progenitor stressed
RPL22L1	2.69E-234	0.751285586	0.793	0.58	4.88E-230	CTB 1
CEBPD	0	0.60692233	0.849	0.563	0	CTB progenitor stressed
PSMA3	0	0.750030526	0.506	0.159	0	CTB progenitor
AIM1	0	0.474578241	0.848	0.573	0	CTB progenitor stressed
CCT3	0	0.884720012	0.847	0.42	0	CTB progenitor stressed
GOLGA4	0	0.748172024	0.949	0.801	0	CTB progenitor-like
RPL23A	7.85E-208	0.748107555	0.878	0.67	1.43E-203	CTB cycling 2
RPS10	0	0.785676292	0.846	0.44	0	CTB progenitor stressed
VDAC1	1.95E-293	0.747975089	0.743	0.457	3.55E-289	CTB cycling 2
EIF3A	0	1559619493	0.845	0.262	0	CTB progenitor stressed
RANBP1	0	0.747716599	0.855	0.611	0	CTB progenitor-like
UBE2S	0	0.549829751	0.845	0.537	0	CTB progenitor stressed
CDC42	4.59E-206	0.747495355	0.991	0.918	8.34E-202	CTB cycling 2
SUB1	0	0.912253743	0.844	0.403	0	CTB progenitor stressed
ITGB1	0	0.689470651	0.844	0.48	0	CTB progenitor stressed
SQLE	0	0.457827803	0.844	0.564	0	CTB progenitor stressed
VDAC2	6.95E-270	0.3395236	0.843	0.604	1.26E-265	CTB progenitor stressed
PPA1	0	0.966208723	0.842	0.384	0	CTB progenitor stressed
UQCR10	0	0.505236546	0.842	0.619	0	CTB progenitor stressed
HNRNPR	0	0.467092463	0.842	0.581	0	CTB progenitor stressed
RAC1	0	0.745420289	0.807	0.507	0	CTB progenitor
ATP5C1	0	0.943954235	0.841	0.486	0	CTB progenitor stressed
GNG5	0	0.745149533	0.846	0.584	0	CTB progenitor-like
PRDX5	4.37E-191	0.256322331	0.84	0.631	7.93E-187	CTB progenitor stressed
CLIC1	1.26E-268	0.74447919	0.817	0.527	2.29E-264	CTB cycling 2
SSR2	1.28E-277	0.744280619	0.897	0.62	2.32E-273	CTB cycling 2
PLIN2	0	1055558159	0.84	0.356	0	CTB progenitor stressed
TPI1	0	0.744135039	0.709	0.315	0	CTB progenitor-like
PSMB6	0	0.744082237	0.807	0.501	0	CTB progenitor-like
PLA2G16	0	1029583302	0.84	0.442	0	CTB progenitor stressed
ARPC5	0	0.743607436	0.938	0.747	0	CTB progenitor-like
RPL31	0	0.743521733	0.585	0.179	0	CTB progenitor-like
RPN2	0	0.743499081	0.815	0.502	0	CTB progenitor-like
OSTC	0	0.743457842	0.959	0.878	0	CTB progenitor-like
OAZ1	0	0.503179846	0.84	0.543	0	CTB progenitor stressed
ENO1	0	0.742621313	0.988	0.92	0	CTB progenitor-like
ATP5L	0	0.426828183	0.84	0.609	0	CTB progenitor stressed
CALM2	0	0.741572209	0.807	0.507	0	CTB progenitor-like
RBM8A	0	1058829296	0.838	0.371	0	CTB progenitor stressed
CFL1	0	0.741437765	0.824	0.514	0	CTB progenitor-like
SPINT1	0	0.741268267	0.861	0.617	0	CTB progenitor-like
HNRNPAB	1.15E-297	0.741103572	0.994	0.872	2.08E-293	CTB cycling 2
P4HB	7.77E-161	0.740974102	0.758	0.566	1.41E-156	CTB progenitor
COX7C	2.62E-236	0.740781579	0.677	0.416	4.75E-232	CTB cycling 2
COX6A1	0	0.740140932	0.819	0.509	0	CTB progenitor-like
TUBA1C	3.68E-277	0.739905486	0.903	0.622	6.69E-273	CTB cycling 2
ATP5E	0	0.847084997	0.838	0.39	0	CTB progenitor stressed
SYNE2	1.49E-233	0.739600046	0.826	0.556	2.71E-229	CTB cycling 2
FXYD3	1.25E-266	0.739506494	0.926	0.676	2.26E-262	CTB cycling 2
DNMT1	1.91E-263	0.739018548	0.882	0.634	3.47E-259	CTB cycling 2
CLDN7	0	0.738943581	0.841	0.589	0	CTB progenitor-like
EIF5	0	0.808772512	0.838	0.449	0	CTB progenitor stressed
MYL12B	0	0.683340346	0.838	0.472	0	CTB progenitor stressed
EGFR	0	0.738605887	0.506	0.168	0	CTB progenitor
SRSF2	3.45E-240	0.737928042	0.873	0.682	6.26E-236	CTB cycling 2
NGFRAP1	0	0.737732438	0.632	0.166	0	SCT 2
PSAP	0	0.737653162	0.829	0.572	0	CTB progenitor-like
COX5A	0	0.636237322	0.838	0.517	0	CTB progenitor stressed
RPL36AL	0	0.73664963	0.705	0.391	0	SCT progenitor
HNRNPU	0	0.704017583	0.837	0.497	0	CTB progenitor stressed
PFN1	0	0.735951793	0.675	0.311	0	CTB progenitor
KRT8	0	0.735374847	0.515	0.073	0	SCT 1
ANP32B	0	0.735010623	0.804	0.465	0	CTB progenitor-like
COL14A1	0	0.734644414	0.844	0.629	0	CTB progenitor-like
SNRPB	0	0.631044143	0.837	0.505	0	CTB progenitor stressed
AP2S1	0	0.734321769	0.87	0.679	0	CTB progenitor-like
HSD17B1	0	0.733759618	1	0.999	0	CTB cycling 2
ARL6IP5	0	0.611118664	0.837	0.499	0	CTB progenitor stressed
GPX1	0	0.539644255	0.837	0.515	0	CTB progenitor stressed
MESDC2	0	0.92182565	0.836	0.398	0	CTB progenitor stressed
TOMM20	0	0.732511954	0.841	0.572	0	CTB progenitor-like
TXN	0	0.641830693	0.836	0.517	0	CTB progenitor stressed
TINAGL1	0	0.732274942	0.814	0.507	0	CTB progenitor-like
EZR	0	0.568874409	0.836	0.557	0	CTB progenitor stressed
SSR4	0	0.5645501	0.836	0.536	0	CTB progenitor stressed
SKP1	0	0.7318343	0.822	0.486	0	CTB progenitor-like
ATF3	0	0.731831464	0.804	0.489	0	CTB progenitor-like
MYDGF	2.12E-182	0.731427413	0.755	0.541	3.86E-178	CTB progenitor
CCT5	0	0.730293451	0.852	0.595	0	CTB progenitor-like
UBC	4.02E-271	0.730167838	0.863	0.562	7.30E-267	CTB cycling 2
SERBP1	0	0.730086221	0.797	0.475	0	CTB progenitor-like
SAP18	0	0.729764938	0.67	0.348	0	CTB progenitor
PRRC2C	0	0.548004786	0.836	0.51	0	CTB progenitor stressed
LDHA	0	0.729458205	0.901	0.697	0	CTB progenitor-like
SRP14	0	0.729213512	0.728	0.394	0	CTB progenitor
RPS4Y1	1.18E-214	0.728753205	0.85	0.598	2.14E-210	CTB cycling 2
LGALS3	0	1034536171	0.835	0.348	0	CTB progenitor stressed
SLC25A3	3.32E-272	0.728556341	0.991	0.885	6.03E-268	CTB cycling 2
CCT6A	0	0.72806668	0.892	0.688	0	CTB progenitor-like
SET	0	0.553134753	0.835	0.519	0	CTB progenitor stressed
ARPC1B	0	0.726621485	0.911	0.74	0	CTB progenitor-like
SQSTM1	0	0.84418015	0.834	0.427	0	CTB progenitor stressed
RPL23	0	0.726327073	0.673	0.348	0	CTB progenitor
CD24	0	0.547499592	0.834	0.567	0	CTB progenitor stressed
PFDN5	0	0.725996522	0.808	0.521	0	CTB progenitor-like
YWHAB	0	0.725377049	0.518	0.09	0	SCT 2
SNHG8	0	1033607077	0.833	0.364	0	CTB progenitor stressed
RPL27	0	0.699308493	0.833	0.479	0	CTB progenitor stressed
HNRNPA3	3.20E-233	0.725052255	0.983	0.835	5.81E-229	CTB cycling 2
EIF3K	0	0.724905508	0.778	0.413	0	CTB progenitor-like
NASP	0	0.724838513	0.853	0.594	0	CTB progenitor-like
UQCRH	0	0.724145806	0.811	0.506	0	CTB progenitor-like
RPL7	0	0.894451669	0.831	0.462	0	CTB progenitor stressed
EIF4G2	0	0.724087535	0.811	0.5	0	CTB progenitor-like
COMT	3.26E-68	0.724084344	0.477	0.336	5.93E-64	CTB cycling 2
KRT23	0	0.660313412	0.831	0.457	0	CTB progenitor stressed
ZFAS1	2.33E-193	0.723428957	0.723	0.515	4.23E-189	CTB progenitor
TFRC	0	0.698968903	0.83	0.422	0	CTB progenitor stressed
XAGE3	0	0.722553397	0.825	0.537	0	CTB progenitor-like
SRRM2	0	0.722417467	0.813	0.507	0	CTB progenitor-like
DDOST	0	0.722413187	0.91	0.755	0	CTB progenitor-like
HMGN2	0	0.559365143	0.83	0.476	0	CTB progenitor stressed
FBLN1	0	0.721786151	0.56	0.095	0	SCT 2
DDX5	0	0.721747269	0.776	0.49	0	CTB cycling 2
LRPAP1	0	0.936479027	0.829	0.472	0	CTB progenitor stressed
ATP5G1	1.49E-222	0.721652468	0.954	0.769	2.70E-218	CTB cycling 2
CANX	0	0.721639201	0.81	0.5	0	CTB progenitor-like
SERF2	3.29E-243	0.721397808	0.748	0.475	5.98E-239	CTB progenitor
ID3	0	0.584195337	0.829	0.521	0	CTB progenitor stressed
UBA52	4.29E-195	0.720985789	0.56	0.308	7.79E-191	CTB 1
PERP	0	0.720946512	0.81	0.493	0	CTB progenitor-like
HSPE1	0	0.581833964	0.829	0.566	0	CTB progenitor stressed
KDELR1	0	0.720206295	0.756	0.356	0	CTB progenitor-like
SEC11A	3.61E-241	0.719956369	0.733	0.484	6.55E-237	CTB progenitor
KRT19	1.03E-279	0.719699843	0.952	0.713	1.87E-275	CTB cycling 2
PRDX1	0	0.503819302	0.829	0.5	0	CTB progenitor stressed
RPL21	1.28E-260	0.347858069	0.828	0.6	2.32E-256	CTB progenitor stressed
PPIA	9.77E-302	0.381327958	0.828	0.584	1.77E-297	CTB progenitor stressed
BTG1	4.75E-297	0.718787855	0.886	0.587	8.63E-293	CTB cycling 2
RPL41	8.24E-214	0.718693763	0.78	0.535	1.50E-209	CTB progenitor
SRSF3	5.44E-165	0.718540067	0.98	0.881	9.87E-161	CTB cycling 2
COX4I1	0	0.717112927	0.819	0.559	0	CTB progenitor-like
CLTA	2.27E-271	0.716964753	0.807	0.52	4.12E-267	CTB cycling 2
TMED9	4.23E-288	0.716809184	0.634	0.17	7.68E-284	SCT 1
ARPC2	1.90E-264	0.716749251	0.844	0.579	3.45E-260	CTB cycling 2
DBI	0	0.806929807	0.828	0.438	0	CTB progenitor stressed
PARK7	7.17E-283	0.715329428	0.882	0.64	1.30E-278	CTB cycling 2
HES1	0	0.797603261	0.828	0.447	0	CTB progenitor stressed
PSMB1	0	0.714694707	0.651	0.255	0	SCT progenitor
RPS27	0	0.77421658	0.828	0.408	0	CTB progenitor stressed
HINT1	0	0.714523831	0.802	0.466	0	CTB progenitor-like
PSMA7	0	0.713950368	0.409	0.136	0	CTB progenitor
RPS28	4.94E-175	0.712827066	0.781	0.584	8.97E-171	CTB progenitor
RPL22	1.72E-144	0.712778295	0.833	0.469	3.12E-140	SCT 1
ANXA2	0	0.712543314	0.847	0.607	0	CTB progenitor-like
LMAN1	0	0.835507709	0.827	0.334	0	CTB progenitor stressed
FTL	0	0.470055338	0.827	0.569	0	CTB progenitor stressed
CYBA	0	0.711375335	0.85	0.563	0	CTB progenitor-like
HNRNPA1	3.96E-09	0.285545486	0.826	0.857	7.19E-05	CTB progenitor stressed
RPL37A	0	0.710821429	0.956	0.865	0	CTB progenitor-like
NFE2L3	2.06E-273	0.710766257	0.888	0.619	3.74E-269	CTB cycling 2
PRELID1	0	0.710692212	0.788	0.443	0	CTB progenitor-like
EEF1A1	1.59E-247	0.710393753	0.931	0.678	2.88E-243	CTB cycling 2
C1QBP	0	1126968748	0.826	0.355	0	CTB progenitor stressed
SERPINF1	0	0.710232155	0.921	0.763	0	CTB progenitor-like
HNRNPDL	0	0.710027446	0.828	0.548	0	CTB progenitor-like
RAN	0	0.577141116	0.825	0.488	0	CTB progenitor stressed
NDUFA4	1.66E-243	0.387342808	0.824	0.677	3.02E-239	CTB progenitor stressed
TUBA1B	0	0.709579097	0.909	0.736	0	CTB progenitor-like
PTGES3	3.63E-260	0.70876813	0.718	0.449	6.58E-256	CTB cycling 2
RPS25	0	0.644110076	0.824	0.514	0	CTB progenitor stressed
TMBIM6	3.53E-242	0.70773131	0.835	0.595	6.42E-238	CTB cycling 2
SRSF7	1.18E-144	0.70748265	0.684	0.299	2.14E-140	SCT 1
DNAJA1	3.42E-174	0.707273439	0.912	0.744	6.20E-170	CTB cycling 2
SLC25A5	0	0.437753728	0.824	0.542	0	CTB progenitor stressed
SLC25A6	0	0.882129967	0.822	0.439	0	CTB progenitor stressed
GNAS	0	0.854541286	0.822	0.45	0	CTB progenitor stressed
BTF3	1.85E-282	0.706530954	0.999	0.916	3.35E-278	CTB cycling 2
FTH1	3.36E-131	0.705912882	0.689	0.491	6.10E-127	CTB 1
H3F3A	0	1860984015	0.821	0.268	0	CTB progenitor stressed
TSC22D1	0	0.705398295	0.662	0.339	0	CTB progenitor
SAT1	0	0.705292407	0.813	0.525	0	CTB progenitor-like
SLC3A2	0	0.989741081	0.821	0.318	0	CTB progenitor stressed
BSG	0	0.623836833	0.821	0.546	0	CTB progenitor stressed
RRBP1	0	0.605401119	0.821	0.46	0	CTB progenitor stressed
RPS29	1.26E-148	0.704192804	0.664	0.478	2.29E-144	CTB progenitor
RPL34	0	0.553088002	0.821	0.511	0	CTB progenitor stressed
EFEMP1	0	0.499636005	0.821	0.498	0	CTB progenitor stressed
SPINT2	4.18E-192	0.703992742	0.813	0.589	7.59E-188	CTB cycling 2
CHCHD2	0	0.703734945	0.809	0.484	0	CTB progenitor-like
PRDX2	0	0.703682039	0.841	0.617	0	CTB progenitor-like
RPL37	1.20E-219	0.703582595	0.925	0.712	2.17E-215	CTB cycling 2
UBB	0	0.459917486	0.821	0.534	0	CTB progenitor stressed
RPS13	9.34E-226	0.703440069	0.871	0.617	1.70E-221	CTB cycling 2
FAU	1.74E-218	0.70337505	0.769	0.483	3.16E-214	CTB progenitor
ATP5G3	0	0.558673329	0.819	0.56	0	CTB progenitor stressed
ACTG1	0	0.487713784	0.819	0.552	0	CTB progenitor stressed
CLDN4	1.47E-206	0.703023616	0.704	0.468	2.68E-202	CTB progenitor
LDHB	1.56E-229	0.702932166	0.846	0.597	2.84E-225	CTB cycling 2
HSPA8	4.32E-185	0.702678669	0.931	0.769	7.84E-181	CTB cycling 2
GCSH	4.26E-240	0.702613704	0.621	0.339	7.73E-236	CTB progenitor
ANXA5	0	0.702369841	0.88	0.633	0	CTB progenitor-like
HMGB1	0	0.702185388	0.571	0.236	0	CTB progenitor
RPL35A	3.53E-180	0.702111625	0.747	0.541	6.42E-176	CTB progenitor
HNRNPA2B1	0	0.702109621	0.878	0.639	0	CTB progenitor-like
ITM2B	0	0.701972447	0.823	0.5	0	CTB progenitor-like
RPS26	0	0.561996276	0.818	0.52	0	CTB progenitor stressed
CD63	0	0.701688936	0.838	0.548	0	CTB progenitor-like
KRT18	0	0.701513815	0.794	0.443	0	CTB progenitor-like
GSTP1	0	0.701136146	0.855	0.643	0	CTB progenitor-like
PRDX4	0	0.70094977	0.852	0.598	0	CTB progenitor-like
S100A11	0	0.498867583	0.818	0.573	0	CTB progenitor stressed
PDIA3	7.57E-239	0.699840831	0.833	0.572	1.38E-234	CTB cycling 2
RPS15A	3.06E-132	0.699373889	0.622	0.427	5.55E-128	CTB cycling 2
RPL9	0	0.65911428	0.817	0.449	0	CTB progenitor stressed
YBX1	0	0.569815738	0.817	0.519	0	CTB progenitor stressed
TPT1	0	0.540343238	0.817	0.472	0	CTB progenitor stressed
NEAT1	0	0.455714835	0.817	0.525	0	CTB progenitor stressed
DSP	0	0.698410164	0.834	0.552	0	CTB progenitor-like
ANXA1	0	0.450427322	0.816	0.524	0	CTB progenitor stressed
PEBP1	0	0.697650991	0.836	0.573	0	CTB progenitor-like
CTSL	0	0.697616594	0.782	0.427	0	CTB progenitor-like
H2AFZ	0	0.697543299	0.539	0.217	0	CTB progenitor
RPL6	3.37E-133	0.697040743	0.749	0.614	6.12E-129	CTB progenitor
CDKN1C	0	0.697019922	0.901	0.696	0	CTB progenitor-like
CALM1	6.75E-196	0.696885587	0.659	0.242	1.23E-191	SCT 1
H3F3B	0	0.696843807	0.82	0.521	0	CTB progenitor-like
CALR	8.53E-233	0.307403098	0.815	0.588	1.55E-228	CTB progenitor stressed
HIST1H4C	0	0.696309946	0.795	0.467	0	CTB progenitor-like
PDIA6	0	0.696298698	0.815	0.516	0	CTB progenitor-like
RPL30	0	0.695859946	0.524	0.201	0	CTB progenitor
EEF1B2	0	1559893141	0.815	0.189	0	CTB progenitor stressed
CD46	0	0.695610064	0.662	0.262	0	SCT 2
TKT	5.49E-255	0.445178427	0.814	0.652	9.97E-251	CTB progenitor stressed
ERP29	2.90E-244	0.695158035	0.616	0.185	5.26E-240	SCT 1
RPL27A	0	0.695087136	0.411	0.13	0	CTB 1
DYNLL1	0	0.799076821	0.814	0.445	0	CTB progenitor stressed
PHLDA2	0	0.645403018	0.814	0.455	0	CTB progenitor stressed
RPL5	0	0.389429605	0.814	0.537	0	CTB progenitor stressed
EIF1	0	0.666883961	0.813	0.437	0	CTB progenitor stressed
NACA	0	0.694260401	0.819	0.526	0	CTB progenitor-like
RPS7	0	0.624799073	0.813	0.539	0	CTB progenitor stressed
NCL	2.24E-238	0.694133821	0.837	0.581	4.07E-234	CTB cycling 2
PPIB	2.78E-177	0.694089599	0.727	0.516	5.05E-173	CTB progenitor
RPL15	0	0.694079174	0.845	0.589	0	CTB progenitor-like
RPS8	0	0.581719677	0.813	0.518	0	CTB progenitor stressed
HSPD1	1.37E-240	0.693847986	0.861	0.613	2.48E-236	CTB cycling 2
NPM1	0	0.693660868	0.421	0.094	0	CTB progenitor
B2M	0	0.664176947	0.812	0.471	0	CTB progenitor stressed
IFI6	0	0.693248991	0.808	0.513	0	CTB progenitor-like
FOS	0	0.614522745	0.812	0.562	0	CTB progenitor stressed
RPL10	4.07E-277	0.415677841	0.811	0.603	7.40E-273	CTB progenitor stressed
JUN	1.08E-293	0.692362712	0.58	0.145	1.96E-289	SCT 1
HSPA5	0	0.691786017	0.811	0.478	0	CTB progenitor-like
APLP2	0	0.691532997	0.901	0.678	0	CTB progenitor-like
MGST3	0	0.691500483	0.828	0.555	0	CTB progenitor-like
IER2	0	0.89400362	0.811	0.341	0	CTB progenitor stressed
HSP90AA1	0	0.69083369	0.812	0.514	0	CTB progenitor-like
HSP90B1	5.10E-280	0.690582157	0.765	0.477	9.26E-276	CTB cycling 2
HSP90AB1	0	0.690575221	0.457	0.149	0	CTB progenitor
DNAJC3	9.22E-231	0.690471806	0.974	0.822	1.67E-226	CTB cycling 2
MRPL22	2.25E-237	0.690371652	0.47	0.214	4.08E-233	CTB 1
BPTF	6.04E-145	0.690336764	0.674	0.476	1.10E-140	CTB 1
TNFRSF12A	0	0.690253227	0.62	0.221	0	SCT 2
PKN2	0	0.69011658	0.786	0.485	0	CTB cycling 2
UQCC2	6.52E-149	0.689786265	0.825	0.635	1.18E-144	CTB cycling 2
CIB1	9.83E-248	0.68958309	0.755	0.485	1.79E-243	CTB cycling 2
DNAJC19	0	0.595353511	0.811	0.469	0	CTB progenitor stressed
PRR13	0	0.689094227	0.787	0.422	0	CTB progenitor-like
PTMA	0	0.413669362	0.811	0.541	0	CTB progenitor stressed
SH3GLB2	0	0.470784255	0.81	0.529	0	CTB progenitor stressed
LYRM2	0	0.688857867	0.812	0.496	0	CTB progenitor-like
MRPL40	0	0.688522692	0.588	0.158	0	SCT 2
ERGIC2	0	0.688153909	0.821	0.506	0	CTB progenitor-like
ATP5I	0	0.396476654	0.81	0.55	0	CTB progenitor stressed
ANXA7	0	0.61741813	0.809	0.548	0	CTB progenitor stressed
ACIN1	0	1057107436	0.808	0.298	0	CTB progenitor stressed
LSM14A	0	0.687173941	0.792	0.46	0	CTB progenitor-like
TOMM22	0	0.780849552	0.808	0.54	0	CTB progenitor stressed
UBA2	1.96E-179	0.68672393	0.818	0.616	3.55E-175	CTB cycling 2
DHX9	0	0.772037392	0.808	0.438	0	CTB progenitor stressed
C19orf70	0	0.686544197	0.896	0.736	0	CTB progenitor-like
CDK4	1.37E-206	0.686064349	0.892	0.706	2.48E-202	CTB cycling 2
LAMTOR4	2.27E-256	0.685951591	0.637	0.336	4.11E-252	CTB progenitor
PHF3	0	0.493556911	0.808	0.522	0	CTB progenitor stressed
RPL18	0	0.685483562	0.832	0.526	0	CTB progenitor-like
RAB25	1.77E-258	0.685265112	0.75	0.48	3.21E-254	CTB cycling 2
RPL7A	1.28E-301	0.685171515	0.571	0.262	2.32E-297	CTB progenitor
MFAP1	1.65E-250	0.685136621	0.756	0.502	2.99E-246	CTB cycling 2
PPP1CC	0	0.488202306	0.808	0.566	0	CTB progenitor stressed
SAR1A	3.71E-288	0.684949158	0.62	0.306	6.74E-284	CTB progenitor
PAIP2	0	0.684921212	0.791	0.488	0	CTB cycling 2
MARVELD3	0	0.458832151	0.808	0.481	0	CTB progenitor stressed
NAA10	3.76E-220	0.684504146	0.938	0.698	6.83E-216	CTB cycling 2
PPP1CB	1.12E-284	0.683501244	0.58	0.276	2.03E-280	CTB progenitor
HMGB2	0	0.637610913	0.807	0.457	0	CTB progenitor stressed
GRPEL1	0	0.683077459	0.443	0.06	0	SCT 2
RPS4X	7.29E-252	0.683041593	0.77	0.486	1.32E-247	CTB cycling 2
PPIF	1.24E-283	0.682859334	0.872	0.598	2.26E-279	CTB cycling 2
TTC3	0	0.682764483	0.789	0.46	0	CTB progenitor-like
VPS28	1.72E-306	0.682215718	0.705	0.385	3.13E-302	CTB progenitor
COMMD6	0	0.682169374	0.823	0.555	0	CTB progenitor-like
CCAR1	0	0.681941374	0.822	0.535	0	CTB progenitor-like
COX14	3.52E-268	0.68151361	0.673	0.383	6.38E-264	CTB progenitor
SLBP	0	0.98061782	0.806	0.337	0	CTB progenitor stressed
TNPO1	0	0.681293752	0.809	0.489	0	CTB progenitor-like
MRPS18C	0	0.549573954	0.806	0.587	0	CTB progenitor stressed
MINOS1	9.72E-155	0.681063625	0.713	0.539	1.76E-150	CTB progenitor
NUDT5	8.40E-195	0.282201787	0.805	0.613	1.52E-190	CTB progenitor stressed
SDF2	0	1067280519	0.805	0.361	0	CTB progenitor stressed
ARL2	1.20E-240	0.680624571	0.719	0.42	2.17E-236	CTB progenitor
AFG3L2	3.55E-205	0.680418201	0.901	0.696	6.45E-201	CTB cycling 2
MRPL13	0	0.680410509	0.818	0.545	0	CTB progenitor-like
PITHD1	0	0.672322515	0.804	0.512	0	CTB progenitor stressed
GLG1	0	0.645380349	0.803	0.463	0	CTB progenitor stressed
TRAPPC1	0	0.679640996	0.488	0.156	0	CTB progenitor
RPL19	0	0.67952929	0.871	0.553	0	CTB cycling 2
LCP1	0	0.477040877	0.803	0.503	0	CTB progenitor stressed
UTRN	5.44E-235	0.679002647	0.782	0.507	9.88E-231	CTB cycling 2
MZT2B	0	0.675341452	0.802	0.454	0	CTB progenitor stressed
PNKD	0	0.678757192	0.593	0.275	0	CTB progenitor
SLC20A1	0	0.678611601	0.808	0.534	0	CTB progenitor-like
PIM3	0	0.678560741	0.854	0.603	0	CTB progenitor-like
HLA-E	1.20E-255	0.678404842	0.865	0.592	2.18E-251	CTB cycling 2
LRPPRC	0	0.677954449	0.847	0.539	0	CTB cycling 2
C19orf60	0	0.677821051	0.82	0.529	0	CTB progenitor-like
COMMD4	2.33E-231	0.677560568	0.802	0.546	4.24E-227	CTB cycling 2
NDUFA3	5.30E-219	0.677310178	0.611	0.189	9.62E-215	SCT 1
MRTO4	0	0.432334164	0.802	0.511	0	CTB progenitor stressed
TMEM230	0	0.677030675	0.824	0.545	0	CTB progenitor-like
PHYH	6.26E-232	0.676886094	0.622	0.346	1.14E-227	CTB progenitor
PSIP1	0	0.818342208	0.801	0.412	0	CTB progenitor stressed
COLEC12	0	0.772631287	0.801	0.488	0	CTB progenitor stressed
WTAP	0	0.676104807	0.829	0.535	0	CTB progenitor-like
IPO7	0	0.512360472	0.801	0.477	0	CTB progenitor stressed
METTL5	0	0.396484268	0.801	0.532	0	CTB progenitor stressed
MCM7	0	0.675063817	0.815	0.518	0	CTB progenitor-like
HTATIP2	0	0.822212162	0.799	0.394	0	CTB progenitor stressed
ACTN4	0	0.613168593	0.799	0.454	0	CTB progenitor stressed
SNRNP25	3.90E-229	0.67443332	0.832	0.611	7.07E-225	CTB cycling 2
TMX1	0	0.488416618	0.799	0.484	0	CTB progenitor stressed
TRAPPC2L	0	0.671084489	0.798	0.518	0	CTB progenitor stressed
RPL10A	0	0.557724333	0.798	0.498	0	CTB progenitor stressed
SKP2	4.70E-247	0.673611275	0.745	0.509	8.54E-243	CTB 1
S100A10	0	0.429239395	0.798	0.524	0	CTB progenitor stressed
UQCRC1	0	0.962735812	0.797	0.357	0	CTB progenitor stressed
DFFA	6.34E-268	0.673407127	0.771	0.497	1.15E-263	CTB cycling 2
DENR	0	0.714655967	0.797	0.44	0	CTB progenitor stressed
TAF9	5.34E-266	0.672824414	0.467	0.199	9.69E-262	CTB 1
DNAJC9	0	0.54523191	0.797	0.47	0	CTB progenitor stressed
PLIN3	1.79E-211	0.672513971	0.735	0.481	3.25E-207	CTB cycling 2
RPL29	0	0.571223221	0.796	0.526	0	CTB progenitor stressed
BANF1	7.81E-226	0.672304063	0.803	0.544	1.42E-221	CTB cycling 2
SELK	3.41E-122	0.672013431	0.848	0.559	6.19E-118	SCT 1
PTRHD1	0	1069009283	0.795	0.288	0	CTB progenitor stressed
SDHD	2.56E-232	0.67139994	0.78	0.5	4.64E-228	CTB cycling 2
C12orf57	0	0.660968394	0.795	0.441	0	CTB progenitor stressed
RPS16	0	0.52173281	0.795	0.511	0	CTB progenitor stressed
NAA38	0	0.69849225	0.794	0.389	0	CTB progenitor stressed
NDUFA5	9.37E-263	0.670689759	0.584	0.291	1.70E-258	CTB progenitor
AHCY	0	0.669842625	0.777	0.386	0	CTB progenitor-like
ANP32E	3.67E-193	0.669836154	0.678	0.248	6.67E-189	SCT 1
RPL26	0	0.581202418	0.794	0.478	0	CTB progenitor stressed
TFAP2A	0	0.38530147	0.794	0.524	0	CTB progenitor stressed
MBNL3	0	0.669344575	0.584	0.232	0	SCT 2
RPAIN	0	1188584957	0.793	0.299	0	CTB progenitor stressed
BAD	0	0.668671004	0.834	0.547	0	CTB progenitor-like
HMGA1	0	0.668606861	0.862	0.568	0	CTB cycling 2
RPL17	0	0.668316379	0.919	0.777	0	CTB progenitor-like
ECHDC1	0	0.668006994	0.804	0.483	0	CTB progenitor-like
RAB8A	0	0.667782407	0.332	0.063	0	SCT 2
DDX1	0	0.667637475	0.992	0.839	0	SCT 2
ALYREF	0	0.947596348	0.793	0.328	0	CTB progenitor stressed
ACTR2	0	0.687149641	0.793	0.444	0	CTB progenitor stressed
CBX5	2.86E-268	0.434476483	0.792	0.6	5.20E-264	CTB progenitor stressed
GCLM	0	0.666742695	0.737	0.317	0	SCT 2
RRP7A	2.61E-254	0.62419501	0.791	0.68	4.74E-250	CTB progenitor stressed
PPP1CA	2.60E-284	0.665810859	0.655	0.338	4.72E-280	CTB 1
PDLIM1	0	0.59706253	0.791	0.48	0	CTB progenitor stressed
RPS17	0	0.431372631	0.791	0.49	0	CTB progenitor stressed
M6PR	0	0.747721816	0.79	0.403	0	CTB progenitor stressed
CAPZA1	4.31E-230	0.665329937	0.765	0.494	7.83E-226	CTB cycling 2
NDUFA8	0	0.665270653	0.79	0.477	0	CTB progenitor-like
RPL24	0	0.465288763	0.79	0.492	0	CTB progenitor stressed
MAN1A2	2.15E-224	0.664865125	0.733	0.479	3.90E-220	CTB progenitor
GLDC	3.91E-263	0.664816672	0.8	0.5	7.10E-259	CTB cycling 2
GAPDH	0	1377174682	0.789	0.398	0	CTB progenitor stressed
CCNC	9.13E-249	0.664729089	0.713	0.417	1.66E-244	CTB progenitor
ETV5	0	0.5273464	0.789	0.461	0	CTB progenitor stressed
PYCARD	2.40E-229	0.664591953	0.678	0.411	4.35E-225	CTB progenitor
PTBP1	0	0.4086567	0.789	0.507	0	CTB progenitor stressed
RPL36A	0	0.664014724	0.855	0.625	0	CTB progenitor-like
COPS6	0	0.756643771	0.788	0.479	0	CTB progenitor stressed
C14orf1	0	0.51358356	0.788	0.563	0	CTB progenitor stressed
MRPL47	0	0.489651077	0.788	0.573	0	CTB progenitor stressed
ADGRG1	0	0.457118885	0.788	0.469	0	CTB progenitor stressed
CCNB1IP1	0	0.387546705	0.788	0.507	0	CTB progenitor stressed
PLEKHJ1	1.31E-214	0.662146607	0.755	0.504	2.39E-210	CTB cycling 2
GOPC	3.03E-239	0.662133979	0.393	0.155	5.50E-235	CTB 1
SND1	0	0.662010984	0.827	0.533	0	CTB progenitor-like
PDCD10	3.89E-173	0.66152565	0.741	0.542	7.07E-169	CTB progenitor
POLR2E	1.62E-115	0.661036271	0.563	0.384	2.95E-111	CTB cycling 2
MRPL54	0	0.552230321	0.787	0.469	0	CTB progenitor stressed
WEE1	0	0.515717712	0.785	0.51	0	CTB progenitor stressed
CALM3	0	0.489950963	0.785	0.468	0	CTB progenitor stressed
PABPN1	3.25E-183	0.255029069	0.784	0.563	5.90E-179	CTB progenitor stressed
NUPR1	0	0.756114953	0.784	0.356	0	CTB progenitor stressed
PIK3C2A	4.72E-225	0.65989898	0.805	0.564	8.57E-221	CTB cycling 2
CLIC4	2.33E-189	0.659713539	0.93	0.758	4.22E-185	CTB cycling 2
MTX1	0	0.700446748	0.783	0.419	0	CTB progenitor stressed
NDUFB7	0	0.659606466	0.806	0.506	0	CTB progenitor-like
ERC1	6.00E-193	0.659442191	0.906	0.698	1.09E-188	CTB cycling 2
RHOC	4.33E-243	0.659384813	0.873	0.611	7.86E-239	CTB cycling 2
MRPL52	0	0.659126948	0.793	0.348	0	SCT progenitor
LAPTM4A	0	0.624579292	0.783	0.478	0	CTB progenitor stressed
WASL	0	0.658824337	0.807	0.474	0	CTB progenitor-like
TIMM10	0	0.658319571	0.875	0.669	0	CTB progenitor-like
ZFAT	2.37E-268	0.658184779	0.784	0.506	4.31E-264	CTB cycling 2
ACTB	0	0.433923778	0.783	0.477	0	CTB progenitor stressed
RPL39	0	1336546802	0.782	0.264	0	CTB progenitor stressed
MRPL12	0	0.657584407	0.599	0.187	0	SCT 2
ANXA3	0	0.65757297	0.471	0.171	0	CTB 1
PPP1R10	0	0.657465679	0.853	0.612	0	CTB progenitor-like
SLC39A7	1.97E-201	0.657458451	0.726	0.481	3.57E-197	CTB progenitor
URI1	1.77E-162	0.657422779	0.674	0.478	3.21E-158	CTB progenitor
SARS	0	0.860550512	0.782	0.312	0	CTB progenitor stressed
CHORDC1	0	0.656771521	0.785	0.445	0	CTB progenitor-like
TDRP	0	0.635001483	0.782	0.449	0	CTB progenitor stressed
RAD50	0	0.56067419	0.782	0.452	0	CTB progenitor stressed
FAM50A	4.38E-195	0.656304114	0.729	0.504	7.96E-191	CTB progenitor
RCOR1	0	0.656013606	0.777	0.382	0	CTB progenitor-like
ERP44	0	0.655979569	0.786	0.415	0	CTB progenitor-like
MKKS	0	0.655684201	0.824	0.525	0	CTB progenitor-like
IMPDH2	4.74E-71	0.655623434	0.661	0.517	8.60E-67	CTB 1
C17orf89	0	0.710966499	0.781	0.428	0	CTB progenitor stressed
LAMC1	0	0.655469405	0.836	0.544	0	CTB progenitor-like
PTPN11	0	0.486848768	0.781	0.483	0	CTB progenitor stressed
MRPL43	9.48E-240	0.655144977	0.771	0.509	1.72E-235	CTB cycling 2
AMOT	0	0.655041561	0.849	0.588	0	CTB progenitor-like
ATP5F1	4.13E-250	0.338488004	0.78	0.562	7.50E-246	CTB progenitor stressed
GNB2L1	0	0.654713258	0.843	0.586	0	CTB progenitor-like
ATP5O	0	0.654427499	0.556	0.237	0	CTB progenitor
PSMD13	0	0.754648354	0.78	0.365	0	CTB progenitor stressed
SEC31A	0	0.641554219	0.78	0.462	0	CTB progenitor stressed
PSME1	0	0.540647847	0.78	0.499	0	CTB progenitor stressed
RPS27A	0	0.652891978	0.811	0.473	0	CTB progenitor-like
PPP1R35	0	0.652834835	0.835	0.573	0	CTB progenitor-like
ACTR3	0	0.652731204	0.527	0.216	0	SCT progenitor
RNMT	3.38E-245	0.652514515	0.804	0.519	6.13E-241	CTB cycling 2
EIF2S3	0	0.652463834	0.871	0.661	0	CTB progenitor-like
HUWE1	0	0.588675575	0.779	0.434	0	CTB progenitor stressed
SEC11C	0	0.65175708	0.848	0.596	0	CTB progenitor-like
NANS	1.23E-204	0.651637423	0.638	0.39	2.24E-200	CTB cycling 2
RPLP1	2.21E-207	0.650991385	0.628	0.205	4.02E-203	SCT 1
PEG10	2.91E-228	0.650878312	0.88	0.603	5.28E-224	CTB cycling 2
CAMK2G	0	0.579892937	0.779	0.581	0	CTB progenitor stressed
AHCYL1	0	0.573175482	0.779	0.459	0	CTB progenitor stressed
COPRS	0	0.796396256	0.778	0.398	0	CTB progenitor stressed
ATRX	0	0.618647901	0.778	0.404	0	CTB progenitor stressed
GNAI2	0	0.650383938	0.821	0.533	0	CTB progenitor-like
AK2	6.15E-252	0.650057785	0.803	0.526	1.12E-247	CTB cycling 2
MSX2	3.21E-271	0.486116926	0.777	0.624	5.82E-267	CTB progenitor stressed
CLINT1	2.43E-275	0.649533376	0.921	0.66	4.42E-271	CTB cycling 2
DGUOK	0	0.428575065	0.777	0.481	0	CTB progenitor stressed
PDCD7	0	1981968474	0.776	0.253	0	CTB progenitor stressed
PGF	0	0.649174121	0.456	0.09	0	SCT 2
SLC25A39	0	0.82916153	0.776	0.329	0	CTB progenitor stressed
PCNA	0	0.649044508	0.812	0.509	0	CTB progenitor-like
SLC25A11	0	0.526058965	0.776	0.462	0	CTB progenitor stressed
UBAC1	3.10E-244	0.648853716	0.642	0.348	5.62E-240	CTB progenitor
ALAS1	0	0.648671121	0.834	0.555	0	CTB progenitor-like
RBM47	0	0.648481172	0.83	0.572	0	CTB progenitor-like
TSG101	0	0.648249169	0.796	0.448	0	CTB progenitor-like
BIN2	0	0.919801891	0.775	0.358	0	CTB progenitor stressed
RPL14	0	0.647934086	0.78	0.391	0	CTB progenitor-like
RPS12	0	0.647856435	0.829	0.562	0	CTB progenitor-like
RPS24	0	0.596770145	0.775	0.441	0	CTB progenitor stressed
CREG1	0	0.593880149	0.775	0.428	0	CTB progenitor stressed
ZDHHC12	2.63E-265	0.646791317	0.631	0.332	4.77E-261	CTB progenitor
CTSB	0	0.870263806	0.774	0.309	0	CTB progenitor stressed
MFAP5	3.63E-193	0.646454456	0.842	0.621	6.59E-189	CTB cycling 2
MAFF	6.34E-205	0.6463261	0.742	0.454	1.15E-200	CTB cycling 2
KATNBL1	0	0.780571129	0.774	0.378	0	CTB progenitor stressed
RPL4	0	0.646078278	0.784	0.436	0	CTB progenitor-like
MYEOV2	0	0.76414779	0.774	0.388	0	CTB progenitor stressed
LARS	0	0.727516929	0.774	0.42	0	CTB progenitor stressed
DDA1	0	0.645577747	0.864	0.665	0	CTB progenitor-like
EPAS1	0	0.452781018	0.774	0.526	0	CTB progenitor stressed
SERPINB6	0	0.755381403	0.773	0.416	0	CTB progenitor stressed
CYB5B	0	0.645371787	0.843	0.604	0	CTB progenitor-like
HINT2	0	0.746293402	0.773	0.373	0	CTB progenitor stressed
RPL12	0	0.573041565	0.773	0.456	0	CTB progenitor stressed
RBBP4	0	0.645153748	0.814	0.494	0	CTB progenitor-like
RPS15	3.45E-166	0.644924489	0.692	0.492	6.27E-162	CTB progenitor
MAGED1	0	0.532123184	0.773	0.431	0	CTB progenitor stressed
RPLP2	0	0.60489016	0.772	0.453	0	CTB progenitor stressed
HSPA1A	0	0.378088058	0.772	0.488	0	CTB progenitor stressed
BORCS7	3.72E-137	0.644100732	0.991	0.93	6.75E-133	CTB 1
ESRRA	1.03E-200	0.644096636	0.618	0.203	1.88E-196	SCT 1
RPS11	8.09E-265	0.370645532	0.771	0.557	1.47E-260	CTB progenitor stressed
PTMS	6.94E-216	0.643493469	0.679	0.414	1.26E-211	CTB cycling 2
RPS5	0	0.643347371	0.418	0.131	0	CTB progenitor
LSM12	0	0.804364062	0.771	0.395	0	CTB progenitor stressed
TGOLN2	3.64E-252	0.642561566	0.754	0.483	6.61E-248	CTB cycling 2
RPL36	0	0.642547703	0.489	0.07	0	SCT 2
GTF2I	0	0.61022935	0.771	0.497	0	CTB progenitor stressed
GRSF1	0	0.485513986	0.771	0.46	0	CTB progenitor stressed
FADS1	0	1021648752	0.77	0.254	0	CTB progenitor stressed
EBP	0	0.640942935	0.983	0.812	0	SCT 2
DCTPP1	0	0.640693901	0.837	0.598	0	CTB progenitor-like
NOLC1	0	0.666203481	0.769	0.4	0	CTB progenitor stressed
PDLIM2	2.00E-287	0.640555864	0.895	0.606	3.63E-283	CTB cycling 2
NDUFV1	2.01E-129	0.640406646	0.811	0.467	3.66E-125	SCT 1
RPS3	0	0.640363761	0.768	0.372	0	CTB progenitor-like
ACSS1	0	0.55180633	0.769	0.458	0	CTB progenitor stressed
EXOSC7	0	0.483109576	0.769	0.488	0	CTB progenitor stressed
WDR43	0	1145360178	0.768	0.234	0	CTB progenitor stressed
SHTN1	3.25E-203	0.639474736	0.579	0.327	5.89E-199	CTB 1
FH	2.53E-260	0.639051808	0.458	0.101	4.60E-256	SCT 1
MALAT1	0	0.638649087	0.366	0.082	0	SCT 2
CBX1	0	0.761009629	0.768	0.388	0	CTB progenitor stressed
ICT1	8.61E-107	0.638394585	0.505	0.336	1.56E-102	CTB 1
HMG20B	0	0.638267392	0.844	0.569	0	CTB progenitor-like
RPS18	0	0.669122754	0.768	0.386	0	CTB progenitor stressed
UBE2V2	0	0.636580672	0.768	0.459	0	CTB progenitor stressed
MT-ND3	0	0.575515094	0.768	0.464	0	CTB progenitor stressed
C10orf54	5.62E-198	0.637234871	0.544	0.292	1.02E-193	CTB 1
RPS19	0	0.637167814	0.632	0.286	0	SCT 2
MYH9	0	0.441457225	0.768	0.485	0	CTB progenitor stressed
ATOX1	0	0.433924764	0.768	0.481	0	CTB progenitor stressed
NFE2L2	0	0.75734326	0.766	0.357	0	CTB progenitor stressed
MT2A	3.82E-226	0.63671868	0.826	0.575	6.94E-222	CTB cycling 2
DAB2	0	0.694802565	0.766	0.407	0	CTB progenitor stressed
CTNNB1	2.14E-208	0.636599903	0.934	0.713	3.88E-204	CTB cycling 2
RPL32	0	0.501169771	0.766	0.464	0	CTB progenitor stressed
ST3GAL4	0	0.636492833	0.835	0.572	0	CTB progenitor-like
SSR1	0	0.43233987	0.766	0.469	0	CTB progenitor stressed
TK1	0	0.673472047	0.765	0.419	0	CTB progenitor stressed
ADK	0	0.636152258	0.516	0.174	0	CTB progenitor
MRPS36	1.85E-168	0.636016709	0.987	0.93	3.36E-164	CTB cycling 2
RPS23	1.81E-226	0.635855377	0.799	0.538	3.28E-222	CTB cycling 2
NPC2	1.28E-220	0.635811416	0.8	0.532	2.32E-216	CTB cycling 2
EIF2A	3.19E-189	0.635646214	0.917	0.687	5.80E-185	CTB cycling 2
RPL35	0	0.635466179	0.898	0.745	0	CTB progenitor-like
SPG21	0	0.89854104	0.764	0.417	0	CTB progenitor stressed
PTGES	0	0.635167725	0.767	0.38	0	CTB progenitor-like
RAB13	0	0.597573466	0.764	0.412	0	CTB progenitor stressed
TMEM70	0	0.562610275	0.763	0.496	0	CTB progenitor stressed
TUBB	3.89E-233	0.634807023	0.742	0.496	7.06E-229	CTB cycling 2
RPL11	0	0.634609714	0.767	0.357	0	CTB progenitor-like
YES1	0	0.634461184	0.786	0.448	0	CTB progenitor-like
SNRPC	0	1126276558	0.762	0.242	0	CTB progenitor stressed
TUSC3	0	0.63405543	0.483	0.147	0	CTB progenitor
EML4	0	0.633800703	0.464	0.139	0	CTB progenitor
C9orf78	0	0.580535161	0.762	0.566	0	CTB progenitor stressed
NCOR1	0	0.5434838	0.762	0.444	0	CTB progenitor stressed
DYNC1LI2	0	0.375401295	0.762	0.476	0	CTB progenitor stressed
HEXB	0	0.716739449	0.761	0.384	0	CTB progenitor stressed
RPL18A	0	0.709717214	0.761	0.375	0	CTB progenitor stressed
MDFI	0	0.589419196	0.761	0.425	0	CTB progenitor stressed
TMOD3	1.61E-172	0.632637867	0.331	0.138	2.92E-168	CTB cycling 2
SS18L2	6.12E-278	0.632451001	0.801	0.519	1.11E-273	CTB cycling 2
NTMT1	1.79E-284	0.632210891	0.819	0.494	3.25E-280	CTB cycling 2
EIF4E2	0	0.631654818	0.843	0.566	0	CTB progenitor-like
GSTO1	0	0.624172428	0.76	0.471	0	CTB progenitor stressed
ABHD17A	0	0.631044505	0.812	0.503	0	CTB progenitor-like
REEP3	1.37E-284	0.351147829	0.759	0.521	2.49E-280	CTB progenitor stressed
KRR1	0	0.630745841	0.857	0.615	0	CTB progenitor-like
PSMC2	0	0.88919842	0.759	0.44	0	CTB progenitor stressed
PAFAH1B1	1.16E-228	0.630486692	0.596	0.32	2.11E-224	CTB progenitor
NAA20	0	0.804155178	0.759	0.373	0	CTB progenitor stressed
GLTSCR2	0	0.455132079	0.759	0.51	0	CTB progenitor stressed
SLC22A11	0	0.982547867	0.758	0.269	0	CTB progenitor stressed
PHAX	1.04E-199	0.629931241	0.82	0.583	1.89E-195	CTB cycling 2
UBAC2	0	0.62991489	0.803	0.473	0	CTB progenitor-like
RPL8	0	0.845544916	0.758	0.307	0	CTB progenitor stressed
NDUFV3	1.12E-211	0.62967788	0.72	0.485	2.03E-207	CTB cycling 2
YIPF3	9.20E-248	0.629603134	0.785	0.508	1.67E-243	CTB cycling 2
LCMT1-AS2	0	0.62166711	0.758	0.409	0	CTB progenitor stressed
TOP2A	0	0.629430785	0.825	0.52	0	CTB progenitor-like
CTDSPL	0	0.628890222	0.765	0.378	0	CTB progenitor-like
RPA3	0	0.575787086	0.758	0.418	0	CTB progenitor stressed
TBCB	0	0.395270533	0.758	0.496	0	CTB progenitor stressed
MRPS16	2.51E-197	0.628462049	0.79	0.536	4.56E-193	CTB cycling 2
APOA1BP	0	0.627990276	0.432	0.074	0	SCT 2
RPS14	0	0.627527992	0.865	0.641	0	CTB progenitor-like
BUB3	4.99E-259	0.627323381	0.645	0.347	9.06E-255	CTB progenitor
CBX4	0	0.638626924	0.757	0.342	0	CTB progenitor stressed
CAPRIN1	0	0.401737119	0.757	0.505	0	CTB progenitor stressed
HSPB8	0	0.747080571	0.755	0.356	0	CTB progenitor stressed
GPAA1	2.30E-229	0.625955047	0.808	0.55	4.17E-225	CTB cycling 2
GRHPR	0	0.625908793	0.792	0.447	0	CTB progenitor-like
NDUFA13	0	0.459008394	0.755	0.505	0	CTB progenitor stressed
RPS6	2.08E-262	0.625346849	0.735	0.468	3.78E-258	CTB cycling 2
MRPL33	0	0.920344004	0.754	0.298	0	CTB progenitor stressed
NDUFB3	0	0.912603212	0.754	0.295	0	CTB progenitor stressed
PUM1	0	0.902786115	0.753	0.29	0	CTB progenitor stressed
CLNS1A	0	0.579267828	0.753	0.428	0	CTB progenitor stressed
NT5C	0	0.58317238	0.752	0.425	0	CTB progenitor stressed
PRPF8	0	0.486136861	0.752	0.451	0	CTB progenitor stressed
IDH3G	0	0.624621286	0.811	0.514	0	CTB progenitor-like
CTSD	0	0.449627516	0.752	0.462	0	CTB progenitor stressed
CTSA	0	0.624519549	0.66	0.274	0	SCT 2
RPL28	0	0.624357405	0.734	0.286	0	CTB progenitor-like
CCDC12	0	0.69312686	0.751	0.387	0	CTB progenitor stressed
PPCS	0	0.519589055	0.751	0.468	0	CTB progenitor stressed
KRT7	0	0.624049577	0.799	0.454	0	CTB progenitor-like
DUSP14	0	0.441945112	0.751	0.491	0	CTB progenitor stressed
BRIX1	0	0.623936901	0.841	0.598	0	CTB progenitor-like
HSBP1L1	0	0.803085773	0.75	0.288	0	CTB progenitor stressed
SMARCB1	0	0.52770744	0.75	0.436	0	CTB progenitor stressed
AC090498.1	2.22E-208	0.623672348	0.834	0.588	4.04E-204	CTB cycling 2
EID2	0	0.623423785	0.856	0.606	0	CTB progenitor-like
GMPS	0	0.414155581	0.75	0.481	0	CTB progenitor stressed
MRPL55	1.86E-205	0.623117109	0.797	0.574	3.37E-201	CTB cycling 2
MCM3	0	0.623016037	0.84	0.582	0	CTB progenitor-like
2015-09-01	0	0.915182105	0.749	0.364	0	CTB progenitor stressed
YME1L1	0	0.622727153	0.797	0.466	0	CTB progenitor-like
TAGLN2	7.12E-285	0.622588011	0.573	0.273	1.29E-280	CTB progenitor
ABCG2	0	0.908112433	0.749	0.321	0	CTB progenitor stressed
NUDCD2	0	0.545351404	0.749	0.493	0	CTB progenitor stressed
STARD10	1.11E-245	0.622225701	0.76	0.487	2.01E-241	CTB cycling 2
IMP4	1.68E-209	0.622178701	0.7	0.465	3.04E-205	CTB cycling 2
PIH1D1	3.07E-198	0.621686489	0.779	0.526	5.57E-194	CTB cycling 2
MYOF	0	0.484187939	0.749	0.444	0	CTB progenitor stressed
GCHFR	0	0.621446427	0.787	0.435	0	CTB progenitor-like
MTAP	0	0.621029095	0.752	0.339	0	CTB progenitor-like
RPLP0	4.00E-114	0.62072251	0.809	0.504	7.26E-110	SCT 1
CPPED1	0	0.620510934	0.815	0.555	0	CTB progenitor-like
FKBP8	0	1661441579	0.748	0.153	0	CTB progenitor stressed
ESD	0	0.619971253	0.513	0.173	0	SCT 2
S100A9	3.11E-230	0.619922923	0.535	0.272	5.64E-226	CTB progenitor
HSD17B4	0	0.619879667	0.669	0.282	0	SCT 2
BAG2	0	0.619818504	0.91	0.751	0	CTB progenitor-like
AGL	0	0.78842756	0.748	0.38	0	CTB progenitor stressed
RNASEH2C	0	0.535633723	0.748	0.494	0	CTB progenitor stressed
NDUFS4	0	0.447688033	0.748	0.454	0	CTB progenitor stressed
POLE4	0	0.820540526	0.747	0.317	0	CTB progenitor stressed
ATP6AP1	0	0.619522706	0.771	0.369	0	CTB progenitor-like
TCEAL8	4.36E-213	0.619482335	0.798	0.541	7.92E-209	CTB cycling 2
TFDP2	3.55E-229	0.61947481	0.874	0.613	6.44E-225	CTB cycling 2
FAM60A	0	0.698886656	0.747	0.351	0	CTB progenitor stressed
TIAL1	2.54E-272	0.619059315	0.723	0.438	4.60E-268	CTB cycling 2
OS9	0	0.603759749	0.747	0.425	0	CTB progenitor stressed
CWC15	0	0.618676172	0.411	0.111	0	CTB progenitor
RDX	0	0.560699931	0.747	0.426	0	CTB progenitor stressed
GTF2H5	4.37E-274	0.618367385	0.782	0.488	7.93E-270	CTB cycling 2
CHCHD5	1.04E-234	0.618237999	0.645	0.373	1.88E-230	CTB progenitor
ARF6	0	0.528174543	0.747	0.457	0	CTB progenitor stressed
RPS9	1.90E-200	0.617787543	0.79	0.567	3.44E-196	CTB cycling 2
LINC00657	2.80E-218	0.617766908	0.682	0.435	5.09E-214	CTB cycling 2
COBLL1	0	0.457902997	0.747	0.457	0	CTB progenitor stressed
PYGL	8.60E-289	0.617190176	0.389	0.131	1.56E-284	CTB progenitor
MRPS11	0	0.617090627	0.685	0.241	0	CTB progenitor-like
ARL5A	1.49E-288	0.390773982	0.746	0.535	2.70E-284	CTB progenitor stressed
TRIM28	2.12E-198	0.616979928	0.777	0.572	3.85E-194	CTB cycling 2
ZNF428	0	0.616948209	0.792	0.494	0	CTB progenitor-like
IGF2	1.60E-161	0.616790572	0.948	0.819	2.91E-157	CTB cycling 2
COMTD1	7.75E-87	0.616502304	0.364	0.22	1.41E-82	CTB 1
PDHB	0	0.857084009	0.746	0.28	0	CTB progenitor stressed
RAB1A	4.05E-192	0.616144568	0.712	0.455	7.36E-188	CTB progenitor
HSPB11	3.85E-287	0.615992275	0.758	0.478	6.99E-283	CTB cycling 2
IK	5.68E-111	0.615970614	0.754	0.442	1.03E-106	SCT 1
GLUL	0	0.477869729	0.746	0.474	0	CTB progenitor stressed
COPS2	0	0.615533776	0.832	0.589	0	CTB progenitor-like
AP2A1	0	0.615454921	0.517	0.205	0	CTB progenitor
MRPS2	5.54E-109	0.615347413	0.604	0.465	1.01E-104	CTB progenitor
MPG	0	0.615038074	0.76	0.358	0	CTB progenitor-like
FNTA	4.85E-204	0.614714814	0.619	0.394	8.80E-200	CTB cycling 2
RPL3	0	0.663029514	0.745	0.371	0	CTB progenitor stressed
CMAS	0	0.614645559	0.814	0.502	0	CTB progenitor-like
EIF1AY	0	0.544394378	0.745	0.41	0	CTB progenitor stressed
MT-ND2	8.15E-263	0.376606008	0.744	0.533	1.48E-258	CTB progenitor stressed
MRPL46	0	0.602360684	0.744	0.403	0	CTB progenitor stressed
CYP11A1	3.84E-221	0.613585732	0.82	0.541	6.98E-217	CTB cycling 2
SUGT1	1.34E-203	0.337282178	0.743	0.593	2.43E-199	CTB progenitor stressed
DCUN1D5	0	0.613340326	0.79	0.431	0	CTB progenitor-like
STS	0	0.916635347	0.742	0.401	0	CTB progenitor stressed
DCAF13	0	0.613153361	0.809	0.493	0	CTB progenitor-like
MT-CO3	5.49E-208	0.613095226	0.618	0.368	9.97E-204	CTB progenitor
RPS3A	0	0.612886561	0.847	0.668	0	CTB progenitor-like
S100P	0	0.548880542	0.742	0.437	0	CTB progenitor stressed
AGFG1	0	0.496599981	0.742	0.438	0	CTB progenitor stressed
YWHAG	0	0.386346082	0.742	0.514	0	CTB progenitor stressed
OSTF1	3.54E-202	0.611835568	0.797	0.532	6.43E-198	CTB cycling 2
GATA2	7.94E-200	0.611756074	0.869	0.637	1.44E-195	CTB cycling 2
EIF3B	0	0.611473341	0.907	0.639	0	SCT 2
RPL13	0	0.692403554	0.741	0.409	0	CTB progenitor stressed
RRP36	0	0.611348482	0.738	0.299	0	CTB progenitor-like
TAX1BP1	0	0.611276515	0.784	0.408	0	CTB progenitor-like
RBMS1	2.61E-250	0.61125997	0.592	0.309	4.74E-246	CTB progenitor
AUP1	0	0.747087675	0.74	0.396	0	CTB progenitor stressed
PHACTR2	1.28E-202	0.610876973	0.899	0.682	2.32E-198	CTB cycling 2
UFM1	0	0.61553558	0.74	0.482	0	CTB progenitor stressed
PITPNA	1.39E-221	0.610641023	0.76	0.515	2.53E-217	CTB cycling 2
GABARAPL1	8.45E-258	0.610635631	0.772	0.481	1.53E-253	CTB cycling 2
COX17	0	0.580256218	0.74	0.394	0	CTB progenitor stressed
RPSA	4.27E-169	0.610332144	0.868	0.663	7.75E-165	CTB cycling 2
RNF126	0	0.61033159	0.446	0.061	0	SCT 2
MBD3	0	0.610295463	0.826	0.518	0	CTB progenitor-like
RTCB	0	0.39502624	0.74	0.453	0	CTB progenitor stressed
EMC10	0	0.62876609	0.739	0.443	0	CTB progenitor stressed
GADD45G	0	0.623970402	0.739	0.372	0	CTB progenitor stressed
CD320	0	0.814206714	0.738	0.325	0	CTB progenitor stressed
TNIP2	0	0.766981705	0.738	0.349	0	CTB progenitor stressed
ANXA11	1.03E-169	0.609229388	0.591	0.369	1.87E-165	CTB progenitor
DDX39A	0	0.495183937	0.737	0.438	0	CTB progenitor stressed
GSTA4	0	0.859559007	0.736	0.315	0	CTB progenitor stressed
PDXK	0	0.585271742	0.736	0.457	0	CTB progenitor stressed
MIEN1	0	0.608095582	0.725	0.304	0	CTB progenitor-like
UBE2E3	0	0.662762432	0.735	0.412	0	CTB progenitor stressed
MAPRE1	7.93E-186	0.607764847	0.72	0.53	1.44E-181	CTB cycling 2
FAM103A1	0	0.508452388	0.735	0.42	0	CTB progenitor stressed
PITPNB	0	0.607371413	0.834	0.571	0	CTB progenitor-like
RPL13A	0	0.452608996	0.735	0.465	0	CTB progenitor stressed
DKC1	0	0.607174208	0.865	0.663	0	CTB progenitor-like
SDHC	0	0.607077428	0.835	0.569	0	CTB progenitor-like
CNDP2	0	0.406586366	0.735	0.463	0	CTB progenitor stressed
RYBP	0	0.606682962	0.888	0.688	0	CTB progenitor-like
PRELID3B	0	0.359604713	0.735	0.471	0	CTB progenitor stressed
HEXIM1	0	0.606419369	0.804	0.488	0	CTB progenitor-like
SIL1	4.68E-167	0.606267143	0.652	0.444	8.49E-163	CTB progenitor
SRSF1	0	0.606047445	0.804	0.461	0	CTB progenitor-like
SLC7A5	0	0.488014996	0.734	0.407	0	CTB progenitor stressed
MMADHC	0	0.433230715	0.734	0.493	0	CTB progenitor stressed
HMGCS1	0	0.605533392	0.748	0.321	0	CTB progenitor-like
HDDC2	0	0.595386302	0.733	0.418	0	CTB progenitor stressed
KIAA0101	0	0.458221412	0.733	0.47	0	CTB progenitor stressed
PPP2CA	1.29E-210	0.605382331	0.827	0.597	2.34E-206	CTB cycling 2
FOXO4	0	0.694037461	0.732	0.332	0	CTB progenitor stressed
POLR2K	0	1093176623	0.731	0.395	0	CTB progenitor stressed
FAM107B	4.72E-191	0.604807521	0.971	0.783	8.58E-187	CTB cycling 2
DVL3	0	0.498105445	0.731	0.435	0	CTB progenitor stressed
PMVK	0	0.604366533	0.73	0.433	0	CTB progenitor stressed
RPN1	0	0.604447877	0.759	0.365	0	CTB progenitor-like
CEBPA	4.48E-189	0.604435927	0.996	0.947	8.14E-185	CTB cycling 2
PTP4A2	0	0.593917937	0.73	0.385	0	CTB progenitor stressed
RPS2	0	0.538749944	0.73	0.416	0	CTB progenitor stressed
C11orf73	0	0.60399386	0.847	0.621	0	CTB progenitor-like
TRAPPC3	0	0.603965882	0.848	0.638	0	CTB progenitor-like
ARHGDIA	0	0.650799339	0.729	0.39	0	CTB progenitor stressed
PCNP	0	0.612749716	0.729	0.55	0	CTB progenitor stressed
AK3	6.05E-140	0.603467992	0.819	0.608	1.10E-135	CTB progenitor
CAPN6	8.15E-300	0.603445069	0.894	0.626	1.48E-295	CTB cycling 2
TMSB10	9.45E-229	0.603295875	0.671	0.423	1.72E-224	CTB cycling 2
CSRP1	0	0.429940021	0.729	0.443	0	CTB progenitor stressed
CMPK1	1.40E-268	0.602872004	0.549	0.259	2.54E-264	CTB progenitor
LAMTOR2	0	0.602616343	0.832	0.551	0	CTB progenitor-like
GM2A	0	1014698744	0.728	0.266	0	CTB progenitor stressed
FURIN	0	0.651897988	0.727	0.333	0	CTB progenitor stressed
PSMD3	0	0.578616101	0.727	0.38	0	CTB progenitor stressed
CTTN	6.17E-236	0.602040776	0.736	0.473	1.12E-231	CTB cycling 2
SNRNP40	0	0.569309974	0.727	0.398	0	CTB progenitor stressed
FAM120A	0	0.51430692	0.727	0.394	0	CTB progenitor stressed
PAGE4	3.00E-38	0.601392538	0.622	0.561	5.45E-34	CTB 1
GLRX	0	0.704129411	0.726	0.352	0	CTB progenitor stressed
NAA50	2.41E-215	0.60087156	0.701	0.45	4.38E-211	CTB cycling 2
COTL1	0	0.600816147	0.904	0.768	0	CTB progenitor-like
TFPI	0	0.600701977	0.443	0.151	0	CTB progenitor
PRKCZ	0	121985237	0.724	0.338	0	CTB progenitor stressed
VGLL3	0	0.441316237	0.724	0.456	0	CTB progenitor stressed
CYP19A1	0	0.770825119	0.723	0.346	0	CTB progenitor stressed
SDC1	4.80E-180	0.600550713	0.665	0.434	8.71E-176	CTB cycling 2
CGA	3.85E-217	0.600480567	0.603	0.341	7.00E-213	CTB progenitor
MTRNR2L12	8.87E-282	0.600188886	0.548	0.243	1.61E-277	CTB progenitor
TFPI2	0	0.600011567	0.796	0.473	0	CTB progenitor-like
CSH1	6.41E-300	0.477027303	0.722	0.528	1.16E-295	CTB progenitor stressed
FSTL3	0	0.599932565	0.774	0.394	0	CTB progenitor-like
TIMP2	0	0.599615443	0.513	0.204	0	CTB progenitor
CGB	0	0.664691748	0.722	0.385	0	CTB progenitor stressed
PSG3	5.61E-208	0.599324705	0.661	0.41	1.02E-203	CTB cycling 2
KISS1	3.69E-214	0.59929894	0.696	0.447	6.71E-210	CTB cycling 2
GDF15	0	0.472547125	0.722	0.434	0	CTB progenitor stressed
MTRNR2L12	0	0.393733102	0.722	0.468	0	CTB progenitor stressed
RPL27A	6.17E-252	0.598989005	0.763	0.497	1.12E-247	CTB cycling 2
RPS24	7.99E-126	0.598739133	0.771	0.395	1.45E-121	SCT 1
RPS9	0	0.598709079	0.762	0.36	0	CTB progenitor-like
RPS29	0	0.59851167	0.677	0.243	0	CTB progenitor-like
RPS2	0	0.597958338	0.781	0.41	0	CTB progenitor-like
NPM1	0	0.597879028	0.74	0.302	0	CTB progenitor-like
RPL37	0	0.599978045	0.721	0.322	0	CTB progenitor stressed
RPS27	2.21E-212	0.597696547	0.746	0.518	4.01E-208	CTB cycling 2
RPL3	0	0.596012717	0.721	0.502	0	CTB progenitor stressed
RPL30	0	0.597157647	0.889	0.692	0	CTB progenitor-like
RPL32	0	0.572324997	0.721	0.421	0	CTB progenitor stressed
RPL9	1.05E-199	0.596882628	0.913	0.637	1.90E-195	CTB cycling 2
RPS14	0	0.526023046	0.721	0.395	0	CTB progenitor stressed
RPS18	0	0.498808957	0.721	0.45	0	CTB progenitor stressed
RPS23	0	0.596377988	0.579	0.313	0	SCT progenitor
RPLP1	2.74E-217	0.596242366	0.708	0.456	4.97E-213	CTB cycling 2
RPL36	0	0.590152232	0.72	0.4	0	CTB progenitor stressed
PAGE4	1.51E-156	0.596158332	0.807	0.614	2.75E-152	CTB cycling 2
RPS4X	0	0.596117127	0.746	0.318	0	CTB progenitor-like
RPS6	4.37E-195	0.59602716	0.684	0.434	7.94E-191	CTB progenitor
RPL14	0	0.678900474	0.719	0.358	0	CTB progenitor stressed
RPS27A	0	0.59599166	0.778	0.397	0	CTB progenitor-like
RPL11	3.21E-206	0.595668349	0.561	0.303	5.83E-202	CTB progenitor
RPL13	0	0.595648755	0.92	0.804	0	CTB progenitor-like
RPS3A	0	0.50933467	0.719	0.429	0	CTB progenitor stressed
RPL24	0	0.477434131	0.719	0.429	0	CTB progenitor stressed
GNB2L1	0	0.635437827	0.718	0.363	0	CTB progenitor stressed
NACA	0	0.582451433	0.718	0.459	0	CTB progenitor stressed
RPL10A	0	0.595034757	0.426	0.135	0	CTB progenitor
RPL35	1.92E-183	0.595030232	0.669	0.44	3.49E-179	CTB cycling 2
RPL15	0	0.460170652	0.718	0.483	0	CTB progenitor stressed
PEG10	0	0.39711759	0.718	0.469	0	CTB progenitor stressed
RPS3	0	0.594871255	0.774	0.371	0	CTB progenitor-like
RPS7	0	0.594507492	0.791	0.44	0	CTB progenitor-like
RPL34	0	0.594505257	0.78	0.403	0	CTB progenitor-like
RPL37A	2.90E-221	0.594356925	0.605	0.31	5.27E-217	CTB progenitor
RPLP0	0	0.594345926	0.723	0.276	0	CTB progenitor-like
RPL26	0	0.594251323	0.792	0.431	0	CTB progenitor-like
RPL18	0	0.594194732	0.754	0.321	0	CTB progenitor-like
RPS28	0	0.594133331	0.748	0.33	0	CTB progenitor-like
RPS16	0	0.594106254	0.77	0.369	0	CTB progenitor-like
RPS12	4.63E-236	0.387364028	0.717	0.509	8.41E-232	CTB progenitor stressed
RPL7A	0	0.508222452	0.717	0.46	0	CTB progenitor stressed
RPL29	2.34E-150	0.593307221	0.362	0.169	4.26E-146	CTB 1
EEF1B2	0	0.593248547	0.753	0.346	0	CTB progenitor-like
RPS19	0	0.593151787	0.735	0.274	0	CTB progenitor-like
PTMA	0	0.944810579	0.716	0.247	0	CTB progenitor stressed
RPL39	1.91E-158	0.592943679	0.682	0.471	3.46E-154	CTB progenitor
RPL22	3.19E-190	0.592789602	0.628	0.392	5.79E-186	CTB progenitor
RPL18A	2.35E-238	0.592688216	0.71	0.448	4.27E-234	CTB cycling 2
RPSA	0	0.59260009	0.714	0.255	0	CTB progenitor-like
RPL6	0	0.592505489	0.505	0.16	0	SCT 2
RPL27	0	0.433002856	0.716	0.44	0	CTB progenitor stressed
RPL35A	9.39E-133	0.592168457	0.504	0.315	1.70E-128	CTB cycling 2
RPL5	9.52E-203	0.591854471	0.318	0.118	1.73E-198	CTB 1
RPS15A	1.63E-285	0.363846494	0.715	0.478	2.97E-281	CTB progenitor stressed
TPT1	0	0.591712796	0.797	0.512	0	CTB progenitor-like
RPL12	0	0.667352683	0.715	0.335	0	CTB progenitor stressed
HNRNPA1	0	0.649373929	0.715	0.34	0	CTB progenitor stressed
TMSB10	0	0.503551986	0.715	0.406	0	CTB progenitor stressed
RPL21	0	0.484921507	0.715	0.412	0	CTB progenitor stressed
RPL8	0	0.59110618	0.28	0.046	0	SCT 2
RPL38	0	0.458862349	0.715	0.458	0	CTB progenitor stressed
RPL28	0	1419210389	0.714	0.171	0	CTB progenitor stressed
RPL13A	0	0.786054533	0.714	0.277	0	CTB progenitor stressed
RPS15	0	0.590401594	0.784	0.412	0	CTB progenitor-like
EEF1A1	0	0.655499277	0.714	0.359	0	CTB progenitor stressed
RPL10	0	0.607242608	0.714	0.411	0	CTB progenitor stressed
UBA52	0	0.476932515	0.714	0.435	0	CTB progenitor stressed
S100A11	0	0.706998937	0.713	0.294	0	CTB progenitor stressed
HSPD1	0	0.489312197	0.713	0.383	0	CTB progenitor stressed
HSP90AB1	1.39E-227	0.590134666	0.581	0.309	2.53E-223	CTB progenitor
HSP90AA1	0	0.419494137	0.713	0.461	0	CTB progenitor stressed
FTH1	0	0.589746822	0.424	0.1	0	CTB progenitor
YBX1	3.78E-198	0.281472562	0.712	0.516	6.87E-194	CTB progenitor stressed
ATP5E	3.00E-250	0.364353288	0.712	0.508	5.45E-246	CTB progenitor stressed
ANXA5	0	0.589400757	0.836	0.561	0	CTB progenitor-like
RPLP2	0	0.563503826	0.712	0.427	0	CTB progenitor stressed
FAU	0	0.589018865	0.724	0.315	0	CTB progenitor-like
EEF2	3.44E-206	0.588803102	0.706	0.457	6.25E-202	CTB cycling 2
SLC25A6	0	0.439240236	0.712	0.398	0	CTB progenitor stressed
NCL	0	0.432010395	0.711	0.442	0	CTB progenitor stressed
RPL19	1.14E-188	0.587553688	0.799	0.561	2.07E-184	CTB cycling 2
PHLDA2	3.75E-239	0.587399875	0.793	0.541	6.81E-235	CTB cycling 2
RPL7	0	0.63287618	0.71	0.306	0	CTB progenitor stressed
RPL23A	0	0.587152197	0.479	0.09	0	SCT 1
RPS25	0	0.562448116	0.71	0.39	0	CTB progenitor stressed
HNRNPA3	0	0.587046769	0.595	0.191	0	SCT 2
RPL23	0	0.586882821	0.702	0.258	0	CTB progenitor-like
PTGES3	3.69E-204	0.586813072	0.538	0.159	6.70E-200	SCT 1
GCSH	0	0.586631301	0.45	0.072	0	SCT 2
XAGE3	0	0.586356181	0.44	0.066	0	SCT 2
PFDN5	0	0.480451364	0.71	0.405	0	CTB progenitor stressed
RPS5	4.77E-285	0.38039535	0.709	0.484	8.66E-281	CTB progenitor stressed
UBB	0	0.500894009	0.709	0.376	0	CTB progenitor stressed
TKT	0	0.586009564	0.913	0.793	0	CTB progenitor-like
CALM1	7.98E-266	0.586008528	0.865	0.575	1.45E-261	CTB cycling 2
RPS8	0	0.458096201	0.709	0.454	0	CTB progenitor stressed
ENO1	4.60E-210	0.585467556	0.668	0.408	8.35E-206	CTB progenitor
C1QBP	8.26E-249	0.585429206	0.508	0.236	1.50E-244	CTB progenitor
RPS17	0	0.585366321	0.783	0.415	0	CTB progenitor-like
GSTP1	0	0.431694242	0.709	0.455	0	CTB progenitor stressed
ATP5L	0	0.585259884	0.821	0.556	0	CTB progenitor-like
RPS11	0	0.585259828	0.763	0.363	0	CTB progenitor-like
RPS10	0	0.585212386	0.423	0.074	0	SCT 2
HINT1	0	0.584876083	0.394	0.107	0	CTB progenitor
ATP5G3	7.58E-210	0.584735087	0.751	0.497	1.38E-205	CTB cycling 2
HMGB1	0	0.584563593	0.806	0.444	0	CTB progenitor-like
SRSF3	0	0.584546093	0.852	0.664	0	CTB progenitor-like
RPS21	0	0.584480259	0.783	0.373	0	CTB progenitor-like
EIF1	1.02E-196	0.584394566	0.635	0.373	1.86E-192	CTB progenitor
RPS13	0	0.922439921	0.708	0.25	0	CTB progenitor stressed
CHCHD2	0	0.584188219	0.787	0.445	0	CTB progenitor-like
HSPE1	8.08E-208	0.584186116	0.868	0.626	1.47E-203	CTB cycling 2
PEBP1	0	0.584127943	0.46	0.171	0	CTB progenitor
PARK7	0	0.584041313	0.767	0.391	0	CTB progenitor-like
GAPDH	0	0.872600899	0.708	0.268	0	CTB progenitor stressed
SRP14	3.73E-215	0.583841167	0.597	0.335	6.78E-211	CTB progenitor
DYNLL1	0	0.743067182	0.708	0.308	0	CTB progenitor stressed
MGST3	0	0.605979405	0.708	0.443	0	CTB progenitor stressed
CCT5	0	0.569844272	0.706	0.389	0	CTB progenitor stressed
ACTG1	0	0.583397169	0.769	0.401	0	CTB progenitor-like
EEF1D	0	0.473573074	0.706	0.443	0	CTB progenitor stressed
VDAC1	0	0.4293725	0.706	0.442	0	CTB progenitor stressed
LRRC75A	2.07E-306	0.44689624	0.705	0.492	3.76E-302	CTB progenitor stressed
LDHB	0	0.582907189	0.743	0.443	0	SCT 2
DSTN	0	0.582717354	0.727	0.296	0	CTB progenitor-like
MRFAP1	0	0.721395787	0.705	0.317	0	CTB progenitor stressed
CLTA	4.26E-209	0.582357239	0.67	0.428	7.74E-205	CTB cycling 2
NDUFA4	6.52E-186	0.582299032	0.547	0.174	1.18E-181	SCT 1
RPL36AL	0	0.528412577	0.705	0.414	0	CTB progenitor stressed
RPL41	0	0.478743428	0.705	0.387	0	CTB progenitor stressed
SET	0	0.455231833	0.705	0.409	0	CTB progenitor stressed
TOMM7	0	0.429362669	0.705	0.417	0	CTB progenitor stressed
XRCC5	1.55E-64	0.58118291	0.586	0.465	2.81E-60	CTB 1
RPL31	0	0.581130172	0.899	0.659	0	CTB progenitor-like
NASP	0	0.581015409	0.792	0.403	0	CTB progenitor-like
DBI	0	0.580964306	0.754	0.339	0	CTB progenitor-like
SERBP1	0	0.580885343	0.431	0.05	0	SCT 2
PRELID1	3.24E-229	0.310652986	0.704	0.492	5.89E-225	CTB progenitor stressed
TMA7	1.39E-250	0.580535896	0.621	0.323	2.53E-246	CTB progenitor
UQCR10	3.82E-233	0.353623126	0.704	0.514	6.93E-229	CTB progenitor stressed
KRT18	0	0.606530357	0.704	0.349	0	CTB progenitor stressed
SSBP1	0	0.580222381	0.719	0.29	0	CTB progenitor-like
HMGA1	0	0.580221192	0.349	0.076	0	CTB 1
APRT	0	0.580215693	0.756	0.368	0	CTB progenitor-like
PLA2G16	0	0.580094825	0.584	0.214	0	SCT progenitor
YWHAE	2.31E-230	0.5799018	0.638	0.364	4.20E-226	CTB progenitor
HNRNPA2B1	0	0.537823026	0.704	0.446	0	CTB progenitor stressed
HSPA8	9.61E-210	0.579879285	0.744	0.498	1.75E-205	CTB cycling 2
H3F3A	0	0.579725751	0.851	0.605	0	CTB progenitor-like
PRDX5	0	0.579624051	0.794	0.47	0	CTB progenitor-like
DDX5	6.41E-196	0.579425775	0.656	0.418	1.16E-191	CTB cycling 2
SNRPD1	0	0.579342091	0.752	0.327	0	CTB progenitor-like
ATPIF1	0	0.426402586	0.704	0.422	0	CTB progenitor stressed
NDUFAB1	0	0.403698609	0.704	0.428	0	CTB progenitor stressed
COX4I1	0	0.579061121	0.79	0.434	0	CTB progenitor-like
EIF3K	0	0.578635893	0.822	0.537	0	CTB progenitor-like
DNAJA1	0	0.583045585	0.703	0.375	0	CTB progenitor stressed
S100A10	1.83E-193	0.578466151	0.64	0.392	3.33E-189	CTB progenitor
ECHS1	0	0.578086769	0.733	0.308	0	CTB progenitor-like
HNRNPR	0	0.459109356	0.703	0.412	0	CTB progenitor stressed
RPL4	0	0.577890164	0.783	0.426	0	CTB progenitor-like
RPS4Y1	0	0.577605649	0.713	0.298	0	CTB progenitor-like
TXN	0	0.577518361	0.695	0.283	0	CTB progenitor-like
COX7C	0	1050332692	0.702	0.218	0	CTB progenitor stressed
ARPC5	0	0.866148066	0.702	0.281	0	CTB progenitor stressed
AP2S1	0	0.576874363	0.774	0.4	0	CTB progenitor-like
PSMA7	0	0.858141605	0.702	0.248	0	CTB progenitor stressed
MYL12B	2.83E-193	0.576661888	0.707	0.474	5.14E-189	CTB cycling 2
NGFRAP1	0	0.576573266	0.814	0.546	0	CTB progenitor-like
SERF2	0	0.576359054	0.821	0.563	0	CTB progenitor-like
GNG5	0	0.591727036	0.702	0.418	0	CTB progenitor stressed
GPX4	0	0.576111255	0.769	0.372	0	CTB progenitor-like
CD24	8.55E-159	0.576040443	0.607	0.404	1.55E-154	CTB cycling 2
PRDX2	1.04E-275	0.411995432	0.701	0.497	1.90E-271	CTB progenitor stressed
ZFAS1	0	1234907813	0.701	0.152	0	CTB progenitor stressed
PPIA	0	0.574521181	0.701	0.34	0	CTB progenitor stressed
PABPC1	1.52E-197	0.575386574	0.736	0.525	2.76E-193	CTB cycling 2
HMGN1	1.40E-153	0.575364091	0.627	0.431	2.55E-149	CTB cycling 2
CTNNB1	0	0.446686425	0.701	0.385	0	CTB progenitor stressed
CCT3	1.91E-168	0.575314127	0.666	0.423	3.47E-164	CTB progenitor
KRT7	0	0.439340155	0.701	0.454	0	CTB progenitor stressed
PLCG2	0	0.575103566	0.766	0.372	0	CTB progenitor-like
PPA1	0	0.393917667	0.701	0.454	0	CTB progenitor stressed
IGF2	0	0.518615618	0.7	0.401	0	CTB progenitor stressed
CDKN1C	0	0.574900742	0.775	0.402	0	CTB progenitor-like
EIF2S2	1.63E-135	0.57457475	0.664	0.486	2.96E-131	CTB progenitor
NDUFB2	0	0.688990165	0.699	0.328	0	CTB progenitor stressed
NDUFS5	0	0.511833641	0.699	0.381	0	CTB progenitor stressed
LSM7	0	0.447126986	0.699	0.414	0	CTB progenitor stressed
SUB1	0	0.574421615	0.401	0.132	0	CTB progenitor
ATP5G1	1.90E-267	0.57439015	0.884	0.662	3.45E-263	CTB cycling 1
CYB5A	2.09E-222	0.300792395	0.698	0.484	3.79E-218	CTB progenitor stressed
COX6C	1.03E-238	0.574216572	0.769	0.499	1.88E-234	CTB cycling 2
COMT	0	0.574047739	0.727	0.312	0	CTB progenitor-like
POLR2L	0	0.573988727	0.773	0.378	0	CTB progenitor-like
UQCRB	0	0.450214655	0.698	0.405	0	CTB progenitor stressed
MZT2B	0	0.573686563	0.726	0.53	0	SCT progenitor
WBP5	0	0.573453988	0.542	0.173	0	SCT 2
PHPT1	6.84E-172	0.573424555	0.786	0.557	1.24E-167	CTB cycling 2
NDUFV2	0	0.573369577	0.777	0.416	0	CTB progenitor-like
RAN	0	0.404097455	0.698	0.428	0	CTB progenitor stressed
SLC25A5	0	0.39469519	0.698	0.407	0	CTB progenitor stressed
ALDOA	1.33E-277	0.37570241	0.697	0.469	2.42E-273	CTB progenitor stressed
CCT6A	0	0.605463449	0.697	0.347	0	CTB progenitor stressed
CNN3	1.34E-185	0.572971111	0.704	0.496	2.44E-181	CTB cycling 2
LDHA	0	0.537489287	0.697	0.375	0	CTB progenitor stressed
TOMM20	0	0.895841742	0.696	0.242	0	CTB progenitor stressed
VDAC2	2.68E-163	0.572786898	0.637	0.245	4.86E-159	SCT 1
EIF4B	0	0.825007512	0.696	0.277	0	CTB progenitor stressed
ST13	9.93E-209	0.572626616	0.642	0.364	1.80E-204	CTB progenitor
H2AFZ	0	0.572560072	0.46	0.146	0	CTB progenitor
ANP32B	1.62E-110	0.27883632	0.695	0.58	2.95E-106	CTB progenitor stressed
HNRNPD	0	0.572112059	0.745	0.33	0	CTB progenitor-like
MPC2	1.24E-163	0.572023579	0.858	0.621	2.25E-159	CTB progenitor
YWHAB	0	0.436285534	0.695	0.437	0	CTB progenitor stressed
ATP5I	6.76E-216	0.571686917	0.789	0.539	1.23E-211	CTB cycling 2
HNRNPK	5.04E-232	0.571406014	0.5	0.127	9.16E-228	SCT 1
RANBP1	0	0.424620367	0.695	0.424	0	CTB progenitor stressed
PRDX1	3.60E-232	0.328431838	0.694	0.486	6.54E-228	CTB progenitor stressed
HNRNPM	0	0.571075999	0.464	0.085	0	SCT 2
SLC25A3	0	0.571050705	0.737	0.313	0	CTB progenitor-like
ARPC1B	0	0.570846133	0.769	0.375	0	CTB progenitor-like
BTF3	0	0.56955174	0.694	0.355	0	CTB progenitor stressed
YWHAZ	0	0.570611964	0.802	0.469	0	CTB progenitor-like
SNRPE	9.12E-263	0.570265617	0.635	0.321	1.66E-258	CTB progenitor
SKP1	1.51E-195	0.570235459	0.705	0.465	2.75E-191	CTB cycling 2
TUBB	0	0.479674828	0.694	0.41	0	CTB progenitor stressed
DUSP9	8.81E-184	0.570072616	0.557	0.322	1.60E-179	CTB progenitor
NAP1L1	0	0.464507367	0.694	0.405	0	CTB progenitor stressed
EIF3E	0	0.847397757	0.693	0.235	0	CTB progenitor stressed
NDUFB10	0	0.495607635	0.693	0.366	0	CTB progenitor stressed
PSMB1	0	0.569804788	0.628	0.272	0	SCT 2
ATP5J	0	0.569607728	0.773	0.381	0	CTB progenitor-like
TRMT112	0	0.447970373	0.693	0.459	0	CTB progenitor stressed
HNRNPC	0	0.569379927	0.788	0.421	0	CTB progenitor-like
HNRNPAB	3.16E-203	0.569340717	0.778	0.53	5.75E-199	CTB cycling 2
SOD1	0	135678555	0.692	0.089	0	CTB progenitor stressed
ATP5J2	7.40E-285	0.569293353	0.483	0.197	1.34E-280	CTB progenitor
DNMT1	0	0.569099554	0.864	0.666	0	CTB progenitor-like
HNRNPDL	7.29E-297	0.56903326	0.417	0.147	1.32E-292	CTB progenitor
PSMD8	0	0.708457552	0.692	0.316	0	CTB progenitor stressed
AURKAIP1	0	0.535747359	0.692	0.386	0	CTB progenitor stressed
PSMA3	0	0.568634541	0.797	0.44	0	CTB progenitor-like
PEG3	0	0.469119141	0.692	0.4	0	CTB progenitor stressed
MLLT1	0	0.568322272	0.751	0.345	0	CTB progenitor-like
RBM8A	5.48E-210	0.568120942	0.705	0.407	9.95E-206	CTB progenitor
SNU13	0	0.568086928	0.761	0.383	0	CTB progenitor-like
SNHG8	5.40E-118	0.567970237	0.616	0.452	9.80E-114	CTB progenitor
RPS20	1.18E-161	0.567917912	0.61	0.386	2.15E-157	CTB progenitor
TIMM13	1.31E-298	0.567917585	0.468	0.181	2.38E-294	CTB progenitor
MRPL51	0	0.567712247	0.731	0.315	0	CTB progenitor-like
UBC	1.12E-111	0.25628169	0.691	0.58	2.03E-107	CTB progenitor stressed
SNX3	0	0.541824918	0.691	0.381	0	CTB progenitor stressed
PHB	2.19E-142	0.567432589	0.758	0.541	3.98E-138	CTB progenitor
ARPC3	5.89E-281	0.340730933	0.69	0.441	1.07E-276	CTB progenitor stressed
COX8A	0	0.665434377	0.69	0.313	0	CTB progenitor stressed
SNRPD2	1.74E-189	0.567180057	0.582	0.336	3.16E-185	CTB progenitor
COX7B	1.01E-201	0.567088467	0.564	0.311	1.84E-197	CTB progenitor
COX7A2	7.41E-193	0.566991299	0.759	0.494	1.35E-188	CTB cycling 2
ATP5D	0	0.566969608	0.759	0.335	0	CTB progenitor-like
SHFM1	5.44E-211	0.566861451	0.719	0.497	9.88E-207	CTB cycling 2
VAMP8	7.42E-184	0.566736161	0.729	0.494	1.35E-179	CTB cycling 2
SNRPB	0	0.554062178	0.69	0.363	0	CTB progenitor stressed
CLIC1	0	0.566711267	0.677	0.263	0	CTB progenitor-like
HNRNPH1	0	0.487478125	0.69	0.407	0	CTB progenitor stressed
COX5B	0	0.481677125	0.69	0.448	0	CTB progenitor stressed
MYL6	7.91E-151	0.566474839	0.493	0.163	1.44E-146	SCT 1
HNRNPU	3.27E-169	0.566422504	0.782	0.507	5.93E-165	CTB progenitor
CBX3	0	0.566411932	0.385	0.103	0	CTB progenitor
CDC42	0	0.56631809	0.743	0.347	0	CTB progenitor-like
CALM2	0	0.566096745	0.452	0.144	0	CTB progenitor
PKIB	1.92E-176	0.565992246	0.651	0.402	3.49E-172	CTB progenitor
EIF3H	7.21E-306	0.343561569	0.689	0.421	1.31E-301	CTB progenitor stressed
UQCRH	0	0.565767269	0.766	0.378	0	CTB progenitor-like
ARPC2	0	0.565755381	0.824	0.527	0	CTB progenitor-like
DDX3X	2.33E-114	0.565688311	0.599	0.432	4.22E-110	CTB progenitor
ETFB	2.02E-194	0.565673567	0.73	0.506	3.66E-190	CTB cycling 2
LGALS3	0	0.565450385	0.731	0.321	0	CTB progenitor-like
ATP5C1	0	0.656595659	0.689	0.383	0	CTB progenitor stressed
MBNL3	0	0.441549277	0.689	0.392	0	CTB progenitor stressed
EIF3G	0	0.564843678	0.786	0.414	0	CTB progenitor-like
COX6B1	4.19E-234	0.339297373	0.688	0.488	7.61E-230	CTB progenitor stressed
GADD45GIP1	0	0.810681646	0.688	0.329	0	CTB progenitor stressed
ATP5A1	0	0.448955054	0.688	0.401	0	CTB progenitor stressed
KRT19	1.18E-259	0.564326278	0.637	0.334	2.15E-255	CTB progenitor
B2M	1.26E-194	0.5642552	0.79	0.555	2.28E-190	CTB cycling 2
FXYD3	0	0.564251167	0.738	0.327	0	CTB progenitor-like
HMGN3	0	0.564145004	0.725	0.29	0	CTB progenitor-like
NEDD8	0	0.564144166	0.725	0.307	0	CTB progenitor-like
MORF4L1	0	0.3838487	0.688	0.423	0	CTB progenitor stressed
LSM4	0	0.671630584	0.687	0.304	0	CTB progenitor stressed
SF3B5	0	0.387911751	0.687	0.413	0	CTB progenitor stressed
RHOA	1.30E-199	0.56351246	0.651	0.419	2.36E-195	CTB cycling 2
CCT2	0	0.379722571	0.687	0.419	0	CTB progenitor stressed
POMP	0	0.375270951	0.687	0.415	0	CTB progenitor stressed
MYL12A	0	0.748229022	0.685	0.281	0	CTB progenitor stressed
NDUFS6	0	0.483099718	0.685	0.384	0	CTB progenitor stressed
C14orf2	0	0.563411791	0.426	0.14	0	CTB progenitor
PDCD5	0	0.563366697	0.799	0.461	0	CTB progenitor-like
HMGN2	0	0.563249785	0.448	0.116	0	SCT 2
PSMB6	7.52E-120	0.563104776	0.561	0.377	1.37E-115	CTB progenitor
OAZ1	0	0.769176189	0.684	0.24	0	CTB progenitor stressed
DEK	0	0.725193592	0.684	0.324	0	CTB progenitor stressed
OLA1	0	0.564613376	0.684	0.366	0	CTB progenitor stressed
TBCA	0	0.48317126	0.684	0.376	0	CTB progenitor stressed
EIF3F	0	0.382717519	0.684	0.413	0	CTB progenitor stressed
FDPS	0	0.562286668	0.806	0.487	0	CTB progenitor-like
[truncated: 12,556 more rows]
