# Supplementary material
Source: MDPI journal article supplement (https://www.mdpi.com/2674-1172/1/2/9)
Supplement: s1 [file s1 › TableS3_Mass_spectometry_CVS-TO_supernatant.xlsx]

## Sheet: Overview
Protein IDs	Majority protein IDs	Peptide counts (all)	Peptide counts (razor+unique)	Peptide counts (unique)	Protein names	Gene names	iBAQ Log2	iBAQ CVS-TO_01 Log2	iBAQ CVS-TO_07 Log2	iBAQ DS-TO Log2	iBAQ CdLS-TO Log2	Intensity Log2	Intensity 20P35940_d13 Log2	Intensity 20P37505_d15 Log2	Intensity 20P42544_d15 Log2	Intensity 21P5009_d12 Log2	Intensity 21P5017_d13 Log2	Fasta headers	Number of proteins	Peptides	Razor + unique peptides	Unique peptides	Peptides 20P35940_d13	Peptides 20P37505_d15	Peptides 20P42544_d15	Peptides 21P5009_d12	Peptides 21P5017_d13	Razor + unique peptides 20P35940_d13	Razor + unique peptides 20P37505_d15	Razor + unique peptides 20P42544_d15	Razor + unique peptides 21P5009_d12	Razor + unique peptides 21P5017_d13	Unique peptides 20P35940_d13	Unique peptides 20P37505_d15	Unique peptides 20P42544_d15	Unique peptides 21P5009_d12	Unique peptides 21P5017_d13	Sequence coverage [%]	Unique + razor sequence coverage [%]	Unique sequence coverage [%]	Mol. weight [kDa]	Sequence length	Sequence lengths	Q-value	Score	Sequence coverage 20P35940_d13 [%]	Sequence coverage 20P37505_d15 [%]	Sequence coverage 20P42544_d15 [%]	Sequence coverage 21P5009_d12 [%]
P02787;C9JVG0;H7C5E8;F8WCI6;C9JB55;F8WEK9;F8WC57	P02787	58;8;8;6;5;5;1	58;8;8;6;5;5;1	55;6;7;6;5;5;1	Serotransferrin	TF	36.3729	34.6252	33.5727	34.3803	33.3344	42.3141	40.6251	40.2991	39.924	39.4574	39.1767	Serotransferrin	7	58	58	55	56	55	52	51	49	56	55	52	51	49	53	52	49	48	47	71.2	71.2	69.5	77.063	698	698;134;143;120;75;115;102	0	323.31	69.9	69.5	67.2	69.9
A6XGL2;P01308;C9JNR5;F8WCM5	A6XGL2;P01308;C9JNR5;F8WCM5	2;2;1;1	2;2;1;1	1;1;0;0	Insulin;Insulin B chain;Insulin A chain;Insulin, isoform 2	INS;INS-IGF2	34.4522	32.2888	32.345	32.171	26.6396	36.2011	33.8738	33.756	34.8829	33.9639	28.2245	Isoform of P01308, Insulin;Insulin;Isoform of P01308, Insulin (Fragment);Insulin, isoform 2	4	2	2	1	2	1	2	2	1	2	1	2	2	1	1	0	1	1	1	28.6	28.6	21.4	10.959	98	98;110;92;200	0	131.91	28.6	7.1	28.6	28.6
P02790;Q9BS19	P02790;Q9BS19	25;14	25;14	22;13	Hemopexin	HPX	34.1665	32.1839	30.4953	32.7723	30.6654	39.1791	37.3621	37.5874	36.7806	35.8207	35.8174	Hemopexin;Isoform of P02790, Epididymis secretory sperm binding protein	2	25	25	22	22	23	21	22	22	22	23	21	22	22	19	20	18	19	19	56.9	56.9	55.2	51.676	462	462;254	0	323.31	56.5	50.4	49.4	50
A0A7I2V3R2;A0A7I2V2L4;A0A7I2V3Y5;A0A7I2V4K2;A0A7I2V529;A0A7I2YQ65;A0A7I2V514;A0A7I2V2L5;A0A7I2YQM2;A0A7I2V452;A0A7P0RGV0;A0A669KB10;A0A669KBG8;Q92538-3;Q92538-2;Q92538	A0A7I2V3R2;A0A7I2V2L4;A0A7I2V3Y5;A0A7I2V4K2;A0A7I2V529;A0A7I2YQ65;A0A7I2V514;A0A7I2V2L5;A0A7I2YQM2;A0A7I2V452;A0A7P0RGV0;A0A669KB10;A0A669KBG8;Q92538-3;Q92538-2;Q92538	1;1;1;1;1;1;1;1;1;1;1;1;1;1;1;1	1;1;1;1;1;1;1;1;1;1;1;1;1;1;1;1	0;0;0;0;0;0;0;0;0;0;0;0;0;0;0;0	Golgi-specific brefeldin A-resistance guanine nucleotide exchange factor 1	GBF1	30.0682	28.7242	28.1575	27.5722	27.4496	31.9354	30.3091	29.1571		30.6005	29.0345	Isoform of Q92538, Golgi-specific brefeldin A-resistance guanine nucleotide exchange factor 1 (Fragment);Isoform of Q92538, Golgi-specific brefeldin A-resistance guanine nucleotide exchange factor 1;Isoform of Q92538, Golgi-specific brefeldin A-resistance	16	1	1	0	1	1	0	1	1	1	1	0	1	1	0	0	0	0	0	40.7	40.7	0	6.6556	59	59;1489;1493;1600;1682;1757;1761;1761;1827;1843;1860;1884;1892;1855;1856;1859	0	7.2425	40.7	40.7	0	40.7
P01834;A0A5H1ZRQ3	P01834;A0A5H1ZRQ3	4;3	4;3	4;3	Ig kappa chain C region	IGKC	29.547	27.5115	26.388	27.5346	26.2667	31.92	29.8334	29.8566	30.2665	28.7099	28.5886	Immunoglobulin kappa constant;Isoform of P01834, Immunoglobulin kappa constant (Fragment)	2	4	4	4	4	2	2	3	3	4	2	2	3	3	4	2	2	3	3	63.6	63.6	63.6	11.765	107	107;107	0	323.31	63.6	29.9	29.9	48.6
Q5VY30;P02753	Q5VY30;P02753	3;3	3;3	3;3	Retinol-binding protein 4;Plasma retinol-binding protein(1-182);Plasma retinol-binding protein(1-181);Plasma retinol-binding protein(1-179);Plasma retinol-binding protein(1-176)	RBP4	29.5376	27.47	26.6002	27.8236	26.524	32.9353	30.9644	31.2533	30.5538	29.9221	29.8459	Isoform of P02753, Retinol-binding protein;Retinol-binding protein 4	2	3	3	3	2	2	1	2	2	2	2	1	2	2	2	2	1	2	2	21.6	21.6	21.6	22.974	199	199;201	0	117.2	10.1	10.1	5	16.6
P0DML3;P0DML2;H0YM39;A0A087WUG6;A6NFB4;P0DML3-2;A0A3B3ISS9;P01241;P01241-2;P01242-3;P0DML3-3;Q14406-2;P01241-3;P01241-5;Q14406;P01242-4;P01242-2;P01241-4;B1A4H2;J3QT06;Q14406-3;A0A0B4J1R0;Q14406-4;P01242	P0DML3;P0DML2;H0YM39;A0A087WUG6;A6NFB4;P0DML3-2	6;6;5;5;3;3;2;2;2;1;1;1;1;1;1;1;1;1;1;1;1;1;1;1	6;6;5;5;3;3;2;2;2;1;1;1;1;1;1;1;1;1;1;1;1;1;1;1	6;6;5;5;3;3;2;2;2;1;1;1;1;1;1;1;1;1;1;1;1;1;1;1	Chorionic somatomammotropin hormone 2;Chorionic somatomammotropin hormone 1	CSH2;CSH1	29.5159	28.1216	27.4821	28.1022	22.8246	33.3933	31.7586	32.2271		31.2425	26.2841	Chorionic somatomammotropin hormone 2;Chorionic somatomammotropin hormone 1;Isoform of P01241, Chorionic somatomammotropin hormone 2;Isoform of P01241, Chorionic somatomammotropin hormone 1;Isoform of P01241, Chorionic somatomammotropin hormone 1;Isoform o	24	6	6	6	3	5	0	4	1	3	5	0	4	1	3	5	0	4	1	39.6	39.6	39.6	24.994	217	217;217;160;128;256;167;310;217;202;202;122;199;179;177;222;245;256;171;122;217;139;160;128;217	0	288.55	24.9	39.6	0	24
A0A0A0MQV6;P09038-2;P09038-3;P09038-1;P09038	A0A0A0MQV6;P09038-2;P09038-3;P09038-1;P09038	3;3;3;3;3	3;3;3;3;3	0;0;0;0;0	Fibroblast growth factor 2	FGF2	29.3366	27.1049	26.4353	27.9944	27.1463	32.6586	30.4268	31.3164	28.0053	29.7572	30.4682	Isoform of P09038, Fibroblast growth factor;Isoform of P09038, Isoform 3 of Fibroblast growth factor 2;Isoform of P09038, Isoform 4 of Fibroblast growth factor 2;Isoform of P09038, Isoform 2 of Fibroblast growth factor 2;Fibroblast growth factor 2	5	3	3	0	2	3	2	2	3	2	3	2	2	3	0	0	0	0	0	9.7	9.7	0	30.752	288	288;155;196;210;288	0	40.897	6.2	9.7	6.2	6.9
B7ZKJ8;Q14624-3;Q14624-2;Q14624;H7C0L5;Q14624-4	B7ZKJ8;Q14624-3;Q14624-2;Q14624;H7C0L5;Q14624-4	10;10;10;10;9;5	10;10;10;10;9;5	10;10;10;10;9;5	Inter-alpha-trypsin inhibitor heavy chain H4;70 kDa inter-alpha-trypsin inhibitor heavy chain H4;35 kDa inter-alpha-trypsin inhibitor heavy chain H4	ITIH4	28.9817	27.1791	25.9194	27.3961	26.4028	35.2515	33.4673	33.6063	32.1158	32.2114	32.5578	Isoform of Q14624, ITIH4 protein;Isoform of Q14624, Isoform 3 of Inter-alpha-trypsin inhibitor heavy chain H4;Isoform of Q14624, Isoform 2 of Inter-alpha-trypsin inhibitor heavy chain H4;Inter-alpha-trypsin inhibitor heavy chain H4;Isoform of Q14624, Inter	6	10	10	10	9	10	5	5	6	9	10	5	5	6	9	10	5	5	6	14.8	14.8	14.8	103.88	935	935;900;914;930;719;845	0	323.31	14.3	14.8	8	5.7
P0DOY3;P0DOY2;A0A5H1ZRQ4;A0A0B4J231;P0CG04;B9A064;P0CF74;A0A5H1ZRQ7;A0M8Q6	P0DOY3;P0DOY2;A0A5H1ZRQ4;A0A0B4J231;P0CG04;B9A064;P0CF74	3;3;3;3;3;3;2;1;1	3;3;3;3;3;3;2;1;1	3;3;3;3;3;3;2;1;1	Ig lambda-1 chain C regions;Immunoglobulin lambda-like polypeptide 5;Ig lambda-6 chain C region	IGLL5;IGLC1;IGLC6	28.833	26.9694	26.2526	26.8956	25.7087	31.7446	29.8939	29.8226	29.3197	29.1105	28.5806	Immunoglobulin lambda constant 3;Immunoglobulin lambda constant 2;Isoform of P0CG04, Immunoglobulin lambda constant 1 (Fragment);Isoform of B9A064, Immunoglobulin lambda-like polypeptide 5;Immunoglobulin lambda constant 1;Immunoglobulin lambda-like polypep	9	3	3	3	3	2	2	2	2	3	2	2	2	2	3	2	2	2	2	47.2	47.2	47.2	11.265	106	106;106;106;215;106;214;106;106;106	0	167.62	47.2	28.3	28.3	28.3
A0A0C4DGB6;P02768;H0YA55;C9JKR2;B7WNR0;P02768-2;D6RHD5;A0A087WWT3;P02768-3;H7C013	A0A0C4DGB6;P02768;H0YA55;C9JKR2;B7WNR0;P02768-2;D6RHD5;A0A087WWT3;P02768-3	13;13;11;10;10;10;9;8;8;4	5;5;3;4;4;4;3;3;3;2	0;0;0;0;0;0;0;0;0;0	Serum albumin	ALB	28.311	25.8096	25.5407	26.385	25.6667	33.4459	30.9706	31.5143	31.4614	30.67	30.796	Isoform of P02768, Albumin;Albumin;Isoform of P02768, Albumin (Fragment);Isoform of P02768, Albumin;Isoform of P02768, Albumin;Isoform of P02768, Isoform 2 of Albumin;Isoform of P02768, Albumin;Isoform of P02768, Albumin;Isoform of P02768, Isoform 3 of Alb	10	13	5	0	11	11	7	8	8	3	3	1	1	1	0	0	0	0	0	14.7	8.9	0	69.226	604	604;609;454;417;494;417;459;396;396;197	0	42.697	10.6	12.6	7.8	7.9
G3XAM2;E7ETH0;P05156;A0A2R8Y3M9;D6R9Z8	G3XAM2;E7ETH0;P05156;A0A2R8Y3M9	10;10;10;8;3	10;10;10;8;3	8;8;8;7;2	Complement factor I;Complement factor I heavy chain;Complement factor I light chain	CFI	28.191	26.756	23.9035	26.629	23.7089	34.2144	32.3055	32.6352	31.9189	30.8161	30.899	Isoform of P05156, Complement factor I;Isoform of P05156, Complement factor I;Complement factor I;readthrough, Uncharacterized protein	5	10	10	8	9	6	4	6	7	9	6	4	6	7	8	5	4	6	6	18.8	18.8	17.5	65.059	576	576;591;583;631;161	0	291.66	18.8	14.1	10.6	14.6
B0YIW2;P02656	B0YIW2;P02656	1;1	1;1	1;1	Apolipoprotein C-III	APOC3	27.6045		25.7519		25.7472	30.6044			29.4431	28.7519	28.7472	Isoform of P02656, Apolipoprotein C-III;Apolipoprotein C-III	2	1	1	1	0	1	1	1	1	0	1	1	1	1	0	1	1	1	1	13.7	13.7	13.7	12.815	117	117;99	0	153.64	0	13.7	13.7	13.7
A0A7I2V5M0;A0A7I2V5P2;A0A7I2V5X9;A0A7I2YQQ3;Q92820	A0A7I2V5M0;A0A7I2V5P2;A0A7I2V5X9;A0A7I2YQQ3;Q92820	1;1;1;1;1	1;1;1;1;1	1;1;1;1;1	Gamma-glutamyl hydrolase	GGH	27.0246			27.0246		28.6096		28.6096				Isoform of Q92820, Gamma-glutamyl hydrolase (Fragment);Isoform of Q92820, Folate gamma-glutamyl hydrolase;Isoform of Q92820, Folate gamma-glutamyl hydrolase;Isoform of Q92820, Folate gamma-glutamyl hydrolase;Gamma-glutamyl hydrolase	5	1	1	1	0	1	1	0	0	0	1	1	0	0	0	1	1	0	0	25.8	25.8	25.8	10.478	93	93;245;271;289;318	0	67.173	0	25.8	25.8	0
C9J0S9;C9JL19;C9JCQ4;C9JL25;E7EXB4;E7ESH4;A0A7I2V5K3;A0A7I2YQ71;A0A7I2V369;A0A7I2V5M1;A0A7I2YQK6;A0A7I2V599;A0A7I2V2X6;P10809-2;P10809	C9J0S9;C9JL19;C9JCQ4;C9JL25;E7EXB4;E7ESH4;A0A7I2V5K3;A0A7I2YQ71;A0A7I2V369;A0A7I2V5M1;A0A7I2YQK6;A0A7I2V599;A0A7I2V2X6;P10809-2;P10809	1;1;1;1;1;1;1;1;1;1;1;1;1;1;1	1;1;1;1;1;1;1;1;1;1;1;1;1;1;1	0;0;0;0;0;0;0;0;0;0;0;0;0;0;0	60 kDa heat shock protein, mitochondrial	HSPD1	26.8843	25.661	25.7846	26.0774	25.2641	29.2621	26.661	28.3474		26.7846	26.2641	Isoform of P10809, 60 kDa heat shock protein, mitochondrial (Fragment);Isoform of P10809, 60 kDa heat shock protein, mitochondrial (Fragment);Isoform of P10809, 60 kDa heat shock protein, mitochondrial (Fragment);Isoform of P10809, 60 kDa heat shock protei	15	1	1	0	1	1	0	1	1	1	1	0	1	1	0	0	0	0	0	36.2	36.2	0	6.3646	58	58;83;94;175;221;231;296;310;322;375;482;537;541;158;573	0	28.062	36.2	36.2	0	36.2
E7ENH0;Q9UQ74-2;Q9UQ74-3;Q9UQ74;M0QZQ1;M0R0E4;M0R235;H7C1I4;G5E9F7;B5MCE1;A0A087WYK1;Q00887-2;P11464-3;P11464;P11464-4;P11464-2	E7ENH0;Q9UQ74-2;Q9UQ74-3;Q9UQ74	3;3;3;3;1;1;1;1;1;1;1;1;1;1;1;1	3;3;3;3;1;1;1;1;1;1;1;1;1;1;1;1	0;0;0;0;0;0;0;0;0;0;0;0;0;0;0;0	Pregnancy-specific beta-1-glycoprotein 8	PSG8	26.8815	26.1762		25.3528	22.2389	31.0514	30.3461	29.5227			26.4088	Isoform of Q9UQ74, Pregnancy-specific beta-1-glycoprotein 8;Isoform of Q9UQ74, Isoform 2 of Pregnancy-specific beta-1-glycoprotein 8;Isoform of Q9UQ74, Isoform 3 of Pregnancy-specific beta-1-glycoprotein 8;Pregnancy-specific beta-1-glycoprotein 8	16	3	3	0	3	2	0	0	1	3	2	0	0	1	0	0	0	0	0	10.4	10.4	0	36.772	326	326;297;419;426;242;309;324;326;326;331;419;402;417;419;426;428	0	24.671	10.4	7.7	0	0
A0A0A0MS08;P01857;A0A0A0MS07;A0A4W9A917;A0A286YEY4;A0A286YES1;P01859;P01860	A0A0A0MS08;P01857;A0A0A0MS07	5;5;4;1;1;1;1;1	5;5;4;1;1;1;1;1	4;4;3;0;0;0;0;0	Ig gamma-1 chain C region	IGHG1	26.7457	25.5858		24.279	22.9692	30.8971	29.8124	28.3664	29.0894		27.0567	Isoform of P01857, Immunoglobulin heavy constant gamma 1 (Fragment);Immunoglobulin heavy constant gamma 1;Isoform of P01857, Immunoglobulin heavy constant gamma 1 (Fragment)	8	5	5	4	3	3	3	1	2	3	3	3	1	2	3	3	2	1	2	19	19	17.3	43.911	399	399;330;295;377;395;446;326;377	0	44.65	13.8	10.8	9	3
A0A286YEY1;P01876;A0A0G2JMB2;A0A286YEY5;P01877	A0A286YEY1;P01876;A0A0G2JMB2;A0A286YEY5;P01877	4;4;2;2;2	4;4;2;2;2	4;4;2;2;2	Ig alpha-1 chain C region;Ig alpha-2 chain C region	IGHA1;IGHA2	26.6009	25.0168		25.6598		30.5078	28.9237	29.5667	27.7279			Isoform of P01876, Immunoglobulin heavy constant alpha 1 (Fragment);Immunoglobulin heavy constant alpha 1;Isoform of P01877, Immunoglobulin heavy constant alpha 2 (Fragment);Isoform of P01877, Immunoglobulin heavy constant alpha 2 (Fragment);Immunoglobulin	5	4	4	4	4	3	2	0	1	4	3	2	0	1	4	3	2	0	1	10.3	10.3	10.3	42.848	398	398;353;340;391;340	0	151.2	10.3	6.5	6	0
P25391;A0A087WYH7;A0A075B783;A0A087WYF1;A0A087WX80;A0A0A0MSA0;O15230-2;P24043;Q16787-3;Q16787;O15230	P25391	22;1;1;1;1;1;1;1;1;1;1	1;0;0;0;0;0;0;0;0;0;0	1;0;0;0;0;0;0;0;0;0;0	Laminin subunit alpha-1	LAMA1	26.3019	24.5311	24.1747	23.9224	23.5001	33.5307	31.7599	31.1512	30.7191	31.4035	30.7289	Laminin subunit alpha-1	11	22	1	1	15	15	10	19	14	1	1	1	1	1	1	1	1	1	1	6.2	0.4	0.4	337.08	3075	3075;241;576;3118;3121;3277;561;3122;3277;3333;3695	0	13.67	5	4.6	3.4	5.8
M0R0E6;K7ELM3;P0DN87;P0DN86;P0DN86-2;A6NKQ9-2;Q6NT52;A6NKQ9	M0R0E6;K7ELM3;P0DN87;P0DN86;P0DN86-2;A6NKQ9-2;Q6NT52;A6NKQ9	2;2;2;2;2;2;2;2	2;2;2;2;2;2;2;2	2;2;2;2;2;2;2;2	Choriogonadotropin subunit beta variant 1;Choriogonadotropin subunit beta variant 2	CGB2;CGB1	25.8924	25.3185	21.5095	24.285		29.0429	28.4141	27.3537		24.5095		Isoform of Q6NT52, Choriogonadotropin subunit beta variant 2 (Fragment);Isoform of A6NKQ9, Choriogonadotropin subunit beta variant 1 (Fragment);Choriogonadotropin subunit beta 7;Choriogonadotropin subunit beta 3;Isoform of P0DN86, Isoform 2 of Choriogonado	8	2	2	2	2	2	0	1	0	2	2	0	1	0	2	2	0	1	0	28.7	28.7	28.7	13.859	129	129;129;165;165;181;155;163;187	0	25.555	28.7	28.7	0	13.2
A0A286YFJ8;P01861	A0A286YFJ8;P01861	2;2	1;1	1;1	Ig gamma-4 chain C region	IGHG4	25.8849	25.4625	23.9067			29.7918	29.3694			27.8137		Isoform of P01861, Immunoglobulin heavy constant gamma 4 (Fragment);Immunoglobulin heavy constant gamma 4	2	2	1	1	1	0	1	1	0	1	0	0	1	0	1	0	0	1	0	6.1	4.3	4.3	43.831	396	396;327	0	9.1857	4.3	0	1.8	4.3
P36955;I3L4F9;I3L107;I3L3Z3;I3L4Z0;I3L2R7	P36955	3;1;1;1;1;1	3;1;1;1;1;1	3;1;1;1;1;1	Pigment epithelium-derived factor	SERPINF1	25.506	24.0172	23.4029	23.6281	22.6579	29.7539	28.2651	27.876		27.6508	26.9059	Pigment epithelium-derived factor	6	3	3	3	3	1	0	2	1	3	1	0	2	1	3	1	0	2	1	14.1	14.1	14.1	46.312	418	418;90;99;111;128;132	0	61.57	14.1	4.1	0	11.2
A0A6Q8PHS9;A0A6Q8PG06;A0A087WSY5;Q96IY4-2;Q96IY4	A0A6Q8PHS9;A0A6Q8PG06;A0A087WSY5;Q96IY4-2;Q96IY4	1;1;1;1;1	1;1;1;1;1	1;1;1;1;1	Carboxypeptidase B2	CPB2	25.3822	25.3822				28.3822	28.3822					Isoform of Q96IY4, Carboxypeptidase B2;Isoform of Q96IY4, Carboxypeptidase B2;Isoform of Q96IY4, Carboxypeptidase B2;Isoform of Q96IY4, Isoform 2 of Carboxypeptidase B2;Carboxypeptidase B2	5	1	1	1	1	0	0	0	0	1	0	0	0	0	1	0	0	0	0	12.1	12.1	12.1	23.371	207	207;220;386;360;423	0	19.966	12.1	0	0	0
B1AHL2;P23142-4	B1AHL2;P23142-4	3;3	3;3	2;2	Fibulin-1	FBLN1	25.2862	23.9668		24.3755	21.3947	30.2404	28.921	29.3297			26.3489	Isoform of P23142, Fibulin-1;Isoform of P23142, Isoform C of Fibulin-1	2	3	3	2	2	2	0	0	1	2	2	0	0	1	2	1	0	0	1	11.2	11.2	6.7	78.329	721	721;683	0	110.52	6.7	7.4	0	0
P05121-2;P05121	P05121-2;P05121	1;1	1;1	1;1	Plasminogen activator inhibitor 1	SERPINE1	24.9411	24.2582	23.5342			29.189	28.5061			27.7821		Isoform of P05121, Isoform 2 of Plasminogen activator inhibitor 1;Plasminogen activator inhibitor 1	2	1	1	1	1	0	0	1	0	1	0	0	1	0	1	0	0	1	0	5.2	5.2	5.2	43.404	387	387;402	0	11.094	5.2	0	0	5.2
P78563-2;P78563-4;P78563;P78563-5	P78563-2;P78563-4;P78563;P78563-5	1;1;1;1	1;1;1;1	0;0;0;0	Double-stranded RNA-specific editase 1	ADARB1	24.8894			23.6718	24.0784	29.8894		28.6719			29.0784	Isoform of P78563, Isoform 2 of Double-stranded RNA-specific editase 1;Isoform of P78563, Isoform 4 of Double-stranded RNA-specific editase 1;Double-stranded RNA-specific editase 1;Isoform of P78563, Isoform 5 of Double-stranded RNA-specific editase 1	4	1	1	0	1	1	1	0	1	1	1	1	0	1	0	0	0	0	0	1	1	0	76.632	701	701;729;741;790	0.0086957	6.0859	1	1	1	0
F8W6P5;A0A2R8Y7R2;P68871	F8W6P5;A0A2R8Y7R2;P68871	1;1;1	1;1;1	1;1;1	Hemoglobin subunit beta;LVV-hemorphin-7;Spinorphin	HBB	24.4309			24.4309		27.2383		27.2383				Isoform of P68871, Hemoglobin subunit beta (Fragment);Isoform of P68871, Hemoglobin subunit beta;Hemoglobin subunit beta	3	1	1	1	0	1	1	0	0	0	1	1	0	0	0	1	1	0	0	21.1	21.1	21.1	9.67	90	90;111;147	0	45.65	0	21.1	21.1	0
Q00889-2;Q00889	Q00889-2;Q00889	2;2	1;1	1;1	Pregnancy-specific beta-1-glycoprotein 6	PSG6	24.1932	23.3917		22.9629		28.7781	27.9767	27.5478				Isoform of Q00889, Isoform 2 of Pregnancy-specific beta-1-glycoprotein 6;Pregnancy-specific beta-1-glycoprotein 6	2	2	1	1	2	1	0	0	0	1	1	0	0	0	1	1	0	0	0	5.9	3.8	3.8	47.501	424	424;435	0	31.491	5.9	3.8	0	0
V9GYE3;V9GYM3;P02652	V9GYE3;V9GYM3;P02652	1;1;1	1;1;1	1;1;1	Apolipoprotein A-II;Proapolipoprotein A-II;Truncated apolipoprotein A-II	APOA2	24.0904	24.0904	23.8151	26.797	24.6621	28.9741	25.6754	28.382		25.4	26.2471	Isoform of P02652, Apolipoprotein A-II;Isoform of P02652, Apolipoprotein A-II;Apolipoprotein A-II	3	1	1	1	1	1	0	1	1	1	1	0	1	1	1	1	0	1	1	42.3	42.3	42.3	5.8767	52	52;133;100	0	125.01	42.3	42.3	0	42.3
D6RD17;D6RHJ6;P01591	D6RD17;D6RHJ6;P01591	1;1;1	1;1;1	1;1;1	Immunoglobulin J chain	JCHAIN;IGJ	23.9793	23.9793				26.9793	26.9793					Isoform of P01591, Immunoglobulin J chain (Fragment);Isoform of P01591, Immunoglobulin J chain (Fragment);Immunoglobulin J chain	3	1	1	1	1	0	0	0	0	1	0	0	0	0	1	0	0	0	0	6.4	6.4	6.4	18.02	157	157;157;159	0	6.382	6.4	0	0	0
A0A0U1RQV3;Q12805-5;Q12805-2;Q12805-4;Q12805-3;Q12805;Q580Q6	A0A0U1RQV3;Q12805-5;Q12805-2;Q12805-4;Q12805-3;Q12805	3;3;3;3;3;3;1	3;3;3;3;3;3;1	1;1;1;1;1;1;0	EGF-containing fibulin-like extracellular matrix protein 1	EFEMP1	23.9646	23.9646		17.5328		28.1511	28.1345	21.7027				Isoform of Q12805, EGF-containing fibulin-like extracellular matrix protein 1 (Fragment);Isoform of Q12805, Isoform 5 of EGF-containing fibulin-like extracellular matrix protein 1;Isoform of Q12805, Isoform 2 of EGF-containing fibulin-like extracellular ma	7	3	3	1	2	1	0	0	0	2	1	0	0	0	1	0	0	0	0	18.6	18.6	8.2	31.646	280	280;355;485;492;492;493;172	0	26.168	12.9	5.7	0	0
E7ETN3;B4E1Z4;P00751;H7C5H1;A0A0G2JH38;H7C526;P00751-2	E7ETN3;B4E1Z4;P00751;H7C5H1;A0A0G2JH38	4;4;4;3;2;1;1	4;4;4;3;2;1;1	3;3;3;2;2;1;1	Complement factor B;Complement factor B Ba fragment;Complement factor B Bb fragment	CFB	23.5473	21.9838	20.3797	22.9515		30.7281	29.4758	29.8044	23.989	26.2126		readthrough, C3/C5 convertase;readthrough, C3/C5 convertase;Complement factor B;Isoform of P00751, Complement factor B (Fragment);Isoform of P00751, C3/C5 convertase (Fragment)	7	4	4	3	3	3	1	1	0	3	3	1	1	0	2	2	1	0	0	5.2	5.2	3.9	124.02	1115	1115;1266;764;305;589;68;621	0	48.52	3.8	3.7	1	1.3
A0A494C018;P01133-2;P01133-3;P01133	A0A494C018;P01133-2;P01133-3;P01133	1;1;1;1	1;1;1;1	1;1;1;1	Pro-epidermal growth factor;Epidermal growth factor	EGF	22.7726	22.7726				28.3873	28.3873					Isoform of P01133, Pro-epidermal growth factor;Isoform of P01133, Isoform 2 of Pro-epidermal growth factor;Isoform of P01133, Isoform 3 of Pro-epidermal growth factor;Pro-epidermal growth factor	4	1	1	1	1	0	0	0	0	1	0	0	0	0	1	0	0	0	0	1.3	1.3	1.3	112.7	1010	1010;1165;1166;1207	0	8.3368	1.3	0	0	0
A0A2R8Y7X9;P69892;P69891	A0A2R8Y7X9;P69892;P69891	1;1;1	1;1;1	1;1;1	Hemoglobin subunit gamma-2;Hemoglobin subunit gamma-1	HBG2;HBG1	22.4173		22.4173			26.0023				26.0023		readthrough, GLOBIN domain-containing protein;Hemoglobin subunit gamma-2;Hemoglobin subunit gamma-1	3	1	1	1	0	0	0	1	0	0	0	0	1	0	0	0	0	1	0	11.3	11.3	11.3	18.42	168	168;147;147	0	7.0837	0	0	0	11.3
P07093-2;P07093;P07093-3	P07093-2;P07093;P07093-3	1;1;1	1;1;1	1;1;1	Glia-derived nexin	SERPINE2	22.3392		22.3392			26.7986				26.7986		Isoform of P07093, Isoform 2 of Glia-derived nexin;Glia-derived nexin;Isoform of P07093, Isoform 3 of Glia-derived nexin	3	1	1	1	0	0	0	1	0	0	0	0	1	0	0	0	0	1	0	4.3	4.3	4.3	44	397	397;398;409	0	17.844	0	0	0	4.3
P23142;B1AHM7;H7C1M6;B1AHM9;P23142-2;P23142-3	P23142;B1AHM7;H7C1M6;B1AHM9;P23142-2;P23142-3	2;1;1;1;1;1	1;0;0;0;0;0	1;0;0;0;0;0	Fibulin-1	FBLN1	21.9022			21.9022		26.8564		26.8564				Fibulin-1;Isoform of P23142, Fibulin-1 (Fragment);Isoform of P23142, Fibulin-1 (Fragment);Isoform of P23142, Fibulin-1 (Fragment);Isoform of P23142, Isoform A of Fibulin-1;Isoform of P23142, Isoform B of Fibulin-1	6	2	1	1	0	2	0	0	0	0	1	0	0	0	0	1	0	0	0	8	3.3	3.3	77.213	703	703;139;183;189;566;601	0	7.2035	0	8	0	0
P13727-2;P13727	P13727-2;P13727	1;1	1;1	1;1	Bone marrow proteoglycan;Eosinophil granule major basic protein	PRG2	21.5849		21.5849			25.3923				25.3923		Isoform of P13727, Isoform 2 of Bone marrow proteoglycan;Bone marrow proteoglycan	2	1	1	1	0	0	0	1	0	0	0	0	1	0	0	0	0	1	0	6.6	6.6	6.6	23.901	211	211;222	0	6.3891	0	0	0	6.6
H0Y7V4;A0A075B6F3;Q96JB1-2;Q96JB1	H0Y7V4;A0A075B6F3;Q96JB1-2;Q96JB1	1;1;1;1	1;1;1;1	1;1;1;1	Dynein heavy chain 8, axonemal	DNAH8	21.1296				19.5308	29.0122			28.4341		27.4134	Isoform of Q96JB1, Dynein heavy chain 8, axonemal;Isoform of Q96JB1, Dynein heavy chain 8, axonemal;Isoform of Q96JB1, Isoform 2 of Dynein axonemal heavy chain 8;Dynein axonemal heavy chain 8	4	1	1	1	1	1	1	1	1	1	1	1	1	1	1	1	1	1	1	0.2	0.2	0.2	478.87	4188	4188;4707;4454;4490	0.0086207	6.0422	0.2	0.2	0.2	0.2
P23526-2;P23526	P23526-2;P23526	1;1	1;1	0;0	Adenosylhomocysteinase	AHCY	20.8883	20.5227			18.7292	25.0583	24.6926				22.8991	Isoform of P23526, Isoform 2 of Adenosylhomocysteinase;Adenosylhomocysteinase	2	1	1	0	1	0	0	0	1	1	0	0	0	1	0	0	0	0	0	2.2	2.2	0	44.658	404	404;432	0	6.8266	2.2	0	0	0
A0A0A0MQS7;P14061	A0A0A0MQS7;P14061	1;1	1;1	1;1	Estradiol 17-beta-dehydrogenase 1	HSD17B1	16.8236	16.8236				20.524	20.524					Isoform of P14061, Estradiol 17-beta-dehydrogenase;17-beta-hydroxysteroid dehydrogenase type 1	2	1	1	1	1	0	0	0	0	1	0	0	0	0	1	0	0	0	0	6.4	6.4	6.4	35.037	329	329;328	0	6.6188	6.4	0	0	0
Q12841-2;Q12841	Q12841-2;Q12841	2;2	2;2	1;1	Follistatin-related protein 1	FSTL1	16.7851	15.3003		16.1473		21.033	19.5482	20.3952				Isoform of Q12841, Isoform 2 of Follistatin-related protein 1;Follistatin-related protein 1	2	2	2	1	1	1	0	0	1	1	1	0	0	1	1	1	0	0	0	7.3	7.3	4.4	31.228	273	273;308	0	13.733	4.4	4.4	0	0
H3BS21;A0A087WU08;A0A0C4DGL8;J3QLC9;J3QR68;H0Y300;P00738-2;P00738	H3BS21;A0A087WU08;A0A0C4DGL8;J3QLC9;J3QR68;H0Y300;P00738-2;P00738	1;1;1;1;1;1;1;1	1;1;1;1;1;1;1;1	0;0;0;0;0;0;0;0	Haptoglobin;Haptoglobin alpha chain;Haptoglobin beta chain	HP	-2											Isoform of P00738, Haptoglobin (Fragment);Isoform of P00738, Haptoglobin;Isoform of P00738, Haptoglobin;Isoform of P00738, Haptoglobin (Fragment);Isoform of P00738, Haptoglobin (Fragment);Isoform of P00738, Haptoglobin;Isoform of P00738, Isoform 2 of Hapto	8	1	1	0	0	1	0	0	0	0	1	0	0	0	0	0	0	0	0	4.1	4.1	0	24.796	222	222;281;347;365;404;442;347;406	0	7.098	0	4.1	0	0
G3XAA7;M0R0U8;E7EW65;Q00887	G3XAA7;M0R0U8;E7EW65;Q00887	2;2;2;2	1;1;1;1	1;1;1;1	Pregnancy-specific beta-1-glycoprotein 9	PSG9	-2											Isoform of Q00887, Pregnancy specific beta-1-glycoprotein 9, isoform CRA_d;Isoform of Q00887, Pregnancy specific beta-1-glycoprotein 9, isoform CRA_c;Isoform of Q00887, Pregnancy-specific beta-1-glycoprotein 9;Pregnancy-specific beta-1-glycoprotein 9	4	2	1	1	2	0	0	0	0	1	0	0	0	0	1	0	0	0	0	9.6	5.8	5.8	27.073	240	240;333;333;426	0	23.136	9.6	0	0	0
P21810;C9JKG1	P21810;C9JKG1	2;1	2;1	0;0	Biglycan	BGN	-2											Biglycan;Isoform of P21810, Biglycan (Fragment)	2	2	2	0	0	0	0	2	0	0	0	0	2	0	0	0	0	0	0	7.9	7.9	0	41.654	368	368;238	0	16.8	0	0	0	7.9
P83105	P83105	1	1	1	Serine protease HTRA4	HTRA4	-2											Serine protease HTRA4	1	1	1	1	0	0	0	1	0	0	0	0	1	0	0	0	0	1	0	2.7	2.7	2.7	50.978	476	476	0.0089286	6.3234	0	0	0	2.7
CON__P02769	CON__P02769	91	91	82	Albumin	ALBU	38.87	36.7222	36.2047	36.6423	36.5342	44.6608	42.5408	42.3939	42.407	41.9866	42.3086		1	91	91	82	79	79	82	77	84	79	79	82	77	84	70	70	75	69	76	88.1	88.1	83.7	69.293	607	607	0	323.31	84.7	84.8	85.5	83.9
CON__Q3SZR3	CON__Q3SZR3	8	8	8	Alpha-1-acid glycoprotein	A1AG	33.6565	31.6147	30.3432	31.7554	30.8445	37.5824	35.4417	35.541	35.4587	34.4766	35.1452		1	8	8	8	8	8	8	7	8	8	8	8	7	8	8	8	8	7	8	30.7	30.7	30.7	23.182	202	202	0	323.31	30.7	30.7	30.7	30.7
CON__P15497	CON__P15497	18	18	15	Apolipoprotein A-I	APOA1	32.4233	29.824	30.635	29.8135	30.189	36.6357	34.2261	33.9434	33.9616	34.8308	34.4128		1	18	18	15	14	12	11	16	14	14	12	11	16	14	11	10	9	14	12	50.2	50.2	46	30.276	265	265	0	323.31	46.8	43	43	50.2
CON__P34955	CON__P34955	14	14	14	Alpha-1-antiproteinase	A!AT	32.0729	29.8527	28.9144	30.5887	28.318	36.7366	34.6281	35.0781	34.797	33.6245	32.9988		1	14	14	14	12	11	11	13	10	12	11	11	13	10	12	11	11	13	10	31	31	31	46.103	416	416	0	323.31	29.3	29.1	26.4	30.8
P19137;A0A087WRP2;Q60675;Q61789	P19137	100;1;1;1	100;1;1;1	79;0;0;0	Laminin subunit alpha-1	Lama1	32.0422	29.6002	30.007	30.062	29.3539	39.5999	37.1483	37.4998	36.9625	37.6854	36.9376	Laminin subunit alpha-1	4	100	100	79	77	74	59	87	79	77	74	59	87	79	63	60	50	69	66	37.6	37.6	32.4	338.14	3083	3083;1349;3118;3330	0	323.31	31.2	30.2	24.2	34.9
CON__Q1RMK2	CON__Q1RMK2	17	17	17			31.8447	29.3913	29.4606	29.9886	29.2071	36.9571	34.6896	35.0094	34.617	34.5332	34.2129		1	17	17	17	17	13	14	13	13	17	13	14	13	13	17	13	14	13	13	44.6	44.6	44.6	65.056	597	597	0	323.31	44.6	37.2	38.9	36.3
E9QN70;P02469	E9QN70;P02469	51;51	51;51	32;32	Laminin subunit beta-1	Lamb1	31.7841	29.4638	29.5268	29.9083	28.8442	38.5883	36.2335	36.7538	36.0744	36.469	35.5154	Isoform of P02469, Laminin subunit beta-1;Laminin subunit beta-1	2	51	51	32	33	41	34	47	37	33	41	34	47	37	20	24	20	31	23	32	32	23.2	202.44	1834	1834;1786	0	323.31	20.9	27	22	30.7
F8VQJ3;P02468;F6SFQ3;F6TLW1;A2ATM9;Q9R0B6	F8VQJ3;P02468	55;51;4;4;3;3	55;51;4;4;3;3	37;34;3;3;0;0	Laminin subunit gamma-1	Lamc1	31.5767	29.3858	29.7088	29.0399	28.9742	38.3246	36.0773	35.8604	35.9604	36.4279	35.5426	Isoform of P02468, Laminin subunit gamma-1;Laminin subunit gamma-1	6	55	55	37	42	39	39	51	38	42	39	39	51	38	29	29	27	35	27	37.1	37.1	23.2	177.19	1607	1607;1607;104;125;1537;1581	0	323.31	32.1	29.4	30.9	32.8
CON__ENSEMBL:ENSBTAP00000018229	CON__ENSEMBL:ENSBTAP00000018229	21	21	3			31.5005	29.2195	28.2603	29.7601	28.4494	37.0056	34.8715	35.1031	34.8783	34.3451	33.9185		1	21	21	3	14	16	16	17	16	14	16	16	17	16	2	3	3	3	3	45.9	45.9	6.3	53.661	475	475	0	323.31	37.9	35.4	38.7	39.4
CON__P41361	CON__P41361	30	30	23	Antithrombin-III	ANT3	31.4105	29.4512	28.0245	29.5562	28.0922	38.1756	35.8468	36.4703	36.4555	34.537	34.9976		1	30	30	23	28	23	24	26	24	28	23	24	26	24	21	17	19	20	18	66.5	66.5	57.2	52.347	465	465	0	323.31	66.2	58.1	62.8	62.6
P10493;O88322	P10493	40;1	40;1	34;0	Nidogen-1	Nid1	31.2795	28.8763	29.1125	29.6727	28.0626	37.6841	35.4965	35.853	34.9357	35.609	34.5428	Nidogen-1	2	40	40	34	30	32	28	35	29	30	32	28	35	29	25	26	23	30	24	43.5	43.5	39.5	136.54	1245	1245;1403	0	323.31	33.8	37.7	31	41.5
CON__P81644	CON__P81644	4	4	4	Apolipoprotein A-II	APOA2	30.7168	28.2899	28.2026	28.5013	27.9647	33.1798	30.7336	30.9272	31.1774	30.9283	30.4145		1	4	4	4	2	2	1	4	2	2	2	1	4	2	2	2	1	4	2	45	45	45	11.202	100	100	0	142.64	17	17	16	45
CON__Q2KJF1	CON__Q2KJF1	14	14	13	Alpha-1B-glycoprotein	A1BG	30.6917	28.5283	28.4552	28.5259	26.9967	35.4657	33.6842	33.3675	33.3444	33.095	31.2105		1	14	14	13	11	11	8	12	7	11	11	8	12	7	10	10	7	11	7	37.8	37.8	36.4	53.553	503	503	0	323.31	34.6	32.4	21.9	34.4
CON__A2I7N0	CON__A2I7N0	18	18	4	Serpin A3-4	SPA34	30.6845	28.8363	27.8397	28.5419	27.664	35.7278	34.168	33.5223	33.2956	33.139	32.2934		1	18	18	4	13	10	10	15	12	13	10	10	15	12	4	3	3	3	2	56.4	56.4	13.9	46.311	411	411	0	323.31	46.2	40.4	40.4	54.5
CON__REFSEQ:XP_001252647	CON__REFSEQ:XP_001252647	14	13	5			30.2687	28.0362	27.4336	28.6415	27.4147	34.7499	32.2841	33.0143	32.3592	32.2283	32.0492		1	14	13	5	8	11	10	10	12	7	10	9	9	11	3	4	3	4	4	37.6	35.7	15.8	46.897	417	417	0	323.31	18	29.3	23.7	25.7
CON__Q9TTE1	CON__Q9TTE1	17	10	9			29.9527	27.5373	27.0204	28.1165	26.8357	34.3763	31.7313	32.6765	32.5846	31.66	30.9231		1	17	10	9	11	10	10	15	12	7	6	6	9	6	6	5	5	8	5	54.3	38.7	36.7	46.203	411	411	0	323.31	41.1	29.9	29.9	51.3
CON__Q1RMN8	CON__Q1RMN8	5	5	5			29.889	24.6946	27.1059	28.5981	22.8192	33.2688	29.1538	31.925	31.8745	30.4343	28.0925		1	5	5	5	3	5	4	3	2	3	5	4	3	2	3	5	4	3	2	30.8	30.8	30.8	24.536	234	234	0	323.31	14.1	30.8	22.2	14.1
CON__P02672	CON__P02672	9	9	9	Fibrinogen alpha chain	FIBA	29.8384	27.8971	26.4964	27.9945	27.1118	35.3524	33.5596	33.4842	33.036	31.8954	32.5726		1	9	9	9	6	7	5	5	5	6	7	5	5	5	6	7	5	5	5	18.4	18.4	18.4	67.011	615	615	0	199.98	14.6	15.9	11.7	10.9
CON__P12763	CON__P12763	3	3	3	Alpha-2-HS-glycoprotein	FETUA	29.7585	28.14	26.6987	27.681	26.5101	33.8134	31.9474	31.905	31.5239	31.2238	30.3174		1	3	3	3	3	3	2	3	3	3	3	2	3	3	3	3	2	3	3	13.6	13.6	13.6	38.418	359	359	0	119.59	13.6	13.6	10.9	13.6
CON__ENSEMBL:ENSBTAP00000014147	CON__ENSEMBL:ENSBTAP00000014147	3	3	3			29.7035	27.6075	26.9312	27.5429	27.0062	32.3303	30.1924	30.1278	30.2406	29.6826	29.6955		1	3	3	3	1	2	1	2	2	1	2	1	2	2	1	2	1	2	2	40.7	40.7	40.7	11.756	113	113	0	116.64	13.3	26.5	13.3	27.4
CON__ENSEMBL:ENSBTAP00000031360	CON__ENSEMBL:ENSBTAP00000031360	8	8	8			29.077	27.1099	26.1542	26.568	26.7796	34.1869	31.9977	32.1394	31.8349	31.0355	32.0692		1	8	8	8	7	5	4	6	6	7	5	4	6	6	7	5	4	6	6	28.1	28.1	28.1	54.678	491	491	0	323.31	25.3	20.2	17.9	22
CON__Q3MHN5	CON__Q3MHN5	20	2	2			29.0113	26.2873	25.9457	28.2621	25.8265	33.6551	30.9311	32.9059	28.2917	30.5896	30.4703		1	20	2	2	14	15	15	15	14	2	2	2	1	1	2	2	2	1	1	43.5	4	4	53.341	474	474	0	13.67	35.7	33.1	36.3	34.8
E9QNY8;Q9JLC8-2;Q9JLC8-3;Q9JLC8	E9QNY8;Q9JLC8-2;Q9JLC8-3;Q9JLC8	1;1;1;1	1;1;1;1	1;1;1;1	Sacsin	Sacs	28.6828	26.6266	25.6779	26.5019	26.3249	36.6828	34.6266	34.5019	34.4942	33.6779	34.3249	Isoform of Q9JLC8, Sacsin;Isoform of Q9JLC8, Isoform 2 of Sacsin;Isoform of Q9JLC8, Isoform 3 of Sacsin;Sacsin	4	1	1	1	1	1	1	1	1	1	1	1	1	1	1	1	1	1	1	0.2	0.2	0.2	520.69	4582	4582;3830;4579;4582	0.0088496	6.1724	0.2	0.2	0.2	0.2
CON__Q3SZV7	CON__Q3SZV7	14	14	14			28.6744	27.3766	25.916	23.324	25.5967	35.4831	33.9389	33.2803	33.5085	32.64	31.043		1	14	14	14	10	10	12	9	8	10	10	12	9	8	10	10	12	9	8	43.7	43.7	43.7	52.295	460	460	0	323.31	32.4	33.5	40.4	35
CON__Q0IIK2;CON__Q29443;CON__Q2HJF0	CON__Q0IIK2;CON__Q29443	19;18;1	18;17;0	18;17;0			28.4545	26.8509	25.7281	26.729	25.3684	34.5319	33.0518	32.7482	31.3891	31.5254	31.392	;	3	19	18	18	17	13	13	10	6	16	12	12	9	6	16	12	12	9	6	34.8	33.1	33.1	77.738	704	704;685;622	0	323.31	34.7	28.3	27.6	17.8
CON__P17690	CON__P17690	7	7	6			28.4402	27.2245	24.4688	26.0705	24.2622	33.1008	31.9094	30.5795	31.1255	29.5177	28.7845		1	7	7	6	7	3	3	3	2	7	3	3	3	2	6	3	3	3	2	28.1	28.1	25.5	38.252	345	345	0	323.31	28.1	14.2	14.2	13.9
CON__Q58D62	CON__Q58D62	6	6	6			27.9793	26.1877	24.6017	26.199	24.2072	32.1791	30.3576	30.3689	30.1529	28.8841	28.6142		1	6	6	6	3	1	4	4	4	3	1	4	4	4	3	1	4	4	4	20.7	20.7	20.7	42.663	387	387	0	301.88	13.4	4.7	11.4	15.8
CON__Q3Y5Z3	CON__Q3Y5Z3	4	4	4			27.9444	25.7846	25.3666	25.547	25.1388	32.1465	30.1042	29.8199	30.2796	29.0671	29.5505		1	4	4	4	4	3	4	3	2	4	3	4	3	2	4	3	4	3	2	19.2	19.2	19.2	26.133	240	240	0	62.498	19.2	15.4	19.2	14.2
CON__ENSEMBL:ENSBTAP00000024462	CON__ENSEMBL:ENSBTAP00000024462	4	4	1			27.2606	26.1526	26.2269	27.0974	25.0208	33.4571	32.0263	31.3454	31.2484	30.4749	29.2687		1	4	4	1	4	4	3	3	1	4	4	3	3	1	1	1	0	1	0	14.8	14.8	3.8	46.543	419	419	0	139.29	14.8	14.8	11	11
CON__Q2KIT0	CON__Q2KIT0	3	3	3			27.1157	25.609	23.9235	24.9803	24.2691	32.2731	31.1735	29.8241	29.4407	29.6909	27.7285		1	3	3	3	3	1	3	3	1	3	1	3	3	1	3	1	3	3	1	23.6	23.6	23.6	20.646	191	191	0	71.295	23.6	7.9	23.6	23.6
P24270;A2AL20	P24270;A2AL20	5;3	5;3	2;1	Catalase	Cat	26.8815	25.1277	24.2207	25.5776	25.1776	33.0642	31.1775	31.1891	30.8702	29.5666	30.3262	Catalase;Isoform of P24270, Catalase	2	5	5	2	3	4	5	2	4	3	4	5	2	4	1	1	2	0	1	13.5	13.5	5.5	59.795	527	527;176	0	268.79	10.1	10.4	13.5	4
CON__REFSEQ:XP_585019	CON__REFSEQ:XP_585019	4	4	4			26.6847	24.938	22.5881	25.1924	22.5423	31.7291	29.9824	30.2368	29.6181	27.6326	27.5867		1	4	4	4	2	3	3	3	1	2	3	3	3	1	2	3	3	3	1	10.8	10.8	10.8	69.561	604	604	0	58.204	6.3	8.1	8.1	8.9
CON__Q2KIU3	CON__Q2KIU3	2	2	2			26.4247	25.423	22.5217	25.2196	25.363	31.6796	30.2326	30.2748		28.9918	28.363		1	2	2	2	2	1	1	2	1	2	1	1	2	1	2	1	1	2	1	14.4	14.4	14.4	22.911	215	215	0	22.147	14.4	6	6	14.4
CON__Q3KUS7	CON__Q3KUS7	8	8	8			26.1877	24.8465	20.6517	25.1273	21.4331	31.8611	30.5564	30.2972	27.4615	27.4209	29.2488		1	8	8	8	5	1	2	4	2	5	1	2	4	2	5	1	2	4	2	13.3	13.3	13.3	85.411	760	760	0	308.78	8.9	1.7	3.7	7.8
CON__Q32PI4	CON__Q32PI4	7	6	6			25.6903	24.0487	22.0796	22.7984	22.9481	32.561	30.5845	30.4861	30.8953	29.7734	28.1961		1	7	6	6	5	4	4	4	3	4	3	4	4	3	4	3	4	4	3	16	14.9	14.9	68.932	618	618	0	129.94	10.4	9.1	7.9	9.2
CON__Q2KIF2	CON__Q2KIF2	3	3	3			25.625	24.9566	23.8761	25.625	23.1839	30.7903	29.0441	29.7125		27.9636	27.2714		1	3	3	3	1	3	0	2	1	1	3	0	2	1	1	3	0	2	1	13.6	13.6	13.6	38.348	346	346	0	101.89	6.9	13.6	0	11
E9PZ16;B1B0C7;A0A571BD72	E9PZ16;B1B0C7	34;33;1	34;33;1	3;2;0		Hspg2	25.5817	22.2959	24.5282	23.2215	22.9466	35.1462	31.685	32.8071	32.4294	33.8816	32.3431	Isoform of Q05793, Basement membrane-specific heparan sulfate proteoglycan core protein;Isoform of Q05793, Basement membrane-specific heparan sulfate proteoglycan core protein	3	34	34	3	12	14	11	34	15	12	14	11	34	15	0	0	0	3	1	11	11	1.3	469.78	4383	4383;4375;239	0	323.31	3.9	4.5	4	11
CON__ENSEMBL:ENSBTAP00000024466	CON__ENSEMBL:ENSBTAP00000024466	4	1	1			25.5511	25.5511				29.6385	29.6385						1	4	1	1	4	3	3	2	1	1	0	0	0	0	1	0	0	0	0	22.7	11.2	11.2	43.9	401	401	0	14.934	22.7	11.5	11.5	7.5
CON__ENSEMBL:ENSBTAP00000013050	CON__ENSEMBL:ENSBTAP00000013050	3	3	3			25.4252	24.2533	23.3615	23.7679		29.9488	28.7768	28.2914		27.885			1	3	3	3	1	1	1	2	0	1	1	1	2	0	1	1	1	2	0	10.6	10.6	10.6	51.988	452	452	0	58.255	3.5	3.5	2.4	8.2
CON__P28800	CON__P28800	7	7	7			25.3233	22.6865	23.2775	23.0318	22.9244	30.4778	27.146	28.6821	28.8108	28.0088	27.3839		1	7	7	7	1	3	4	5	3	1	3	4	5	3	1	3	4	5	3	26.6	26.6	26.6	54.71	492	492	0	245.42	2.6	9.1	14.2	15
CON__Q32PJ2	CON__Q32PJ2	5	5	5			25.2576	24.569	22.5766	21.5536	20.9239	30.036	29.224	25.9459	27.1273	27.3079	26.524		1	5	5	5	3	1	2	3	3	3	1	2	3	3	3	1	2	3	3	15.5	15.5	15.5	43.017	380	380	0	155.52	9.5	2.9	6.6	8.9
CON__ENSEMBL:ENSBTAP00000038329	CON__ENSEMBL:ENSBTAP00000038329	2	1	1			25.1133				25.1133	30.0816			29.8843		27.1133		1	2	1	1	0	0	1	1	2	0	0	1	0	1	0	0	1	0	1	27.5	15	15	8.5787	80	80	0	19.454	0	0	15	12.5
CON__A2I7N3	CON__A2I7N3	9	1	1			24.9281	26.1682	25.6683	24.9281	24.9782	32.2186	30.3381	29.098	30.4929	29.8382	29.1482		1	9	1	1	6	8	8	6	8	1	1	1	1	1	1	1	1	1	1	21.8	2.4	2.4	46.941	417	417	0	32.344	12.2	18	18	12.2
CON__ENSEMBL:ENSBTAP00000018574	CON__ENSEMBL:ENSBTAP00000018574	4	4	4			24.8846	22.9152	20.9226	23.2565	21.0244	30.9595	29.7458	27.9004	27.7331	29.2999	25.6683		1	4	4	4	2	1	1	4	1	2	1	1	4	1	2	1	1	4	1	14.1	14.1	14.1	55.207	496	496	0	190.35	9.3	1.6	1.6	14.1
CON__Q2KIS7	CON__Q2KIS7	2	2	1			24.7676			24.3934	22.6379	27.9375		27.5633			25.8078		1	2	2	1	1	1	0	2	1	1	1	0	2	1	1	1	0	1	1	12.9	12.9	6.9	22.144	202	202	0	14.966	6.9	6.9	0	12.9
P32261;A0A0A6YWH7;A0A0A6YXS8;A0A0A6YX49;A0A0A6YX70	P32261;A0A0A6YWH7	9;6;4;4;1	3;2;1;1;0	2;1;1;1;0	Antithrombin-III	Serpinc1	24.7505	23.6656	23.8307	24.8172	25.4924	33.1732	32.2882	29.7241	30.6547	28.7377	30.3993	Antithrombin-III;Isoform of P32261, Antithrombin-III (Fragment)	5	9	3	2	9	6	5	6	6	3	1	1	1	1	2	1	1	0	1	20.6	8.6	4.1	52.003	465	465;286;92;103;107	0	72.005	20.6	12.7	11.2	15.1
CON__A2I7N1	CON__A2I7N1	16	2	2			24.4714	19.6828	23.4363	19.0861	23.2741	29.6721	24.0047	23.4081	22.8126	28.7601	28.4453		1	16	2	2	12	9	9	14	12	2	1	1	2	2	2	1	1	2	2	50.4	7.5	7.5	46.397	411	411	0	118.07	45	34.1	34.1	47.2
CON__Q2UVX4	CON__Q2UVX4	5	5	5			24.1958	22.7017	21.6095	22.2541		31.3803	30.0373	29.5371	28.6286	28.8951			1	5	5	5	3	3	2	3	0	3	3	2	3	0	3	3	2	3	0	4.6	4.6	4.6	187.37	1662	1662	0	162.32	3.1	3.1	2	2.7
CON__ENSEMBL:ENSBTAP00000024146	CON__ENSEMBL:ENSBTAP00000024146	13	13	13			24.1756	23.4728	22.4221	23.0148	20.6862	32.2053	30.6998	29.2436	29.9457	30.1762	28.2749		1	13	13	13	7	4	2	9	4	7	4	2	9	4	7	4	2	9	4	14.6	14.6	14.6	164.34	1477	1477	0	323.31	8.1	6	3	11
CON__P01044-1;CON__Q2KJ62;CON__P01045-1	CON__P01044-1;CON__Q2KJ62	5;5;2	5;5;2	5;5;2			24.1148	23.823	19.5475	19.7439	20.6826	29.4494	29.0881	24.8732	24.7465	25.2153	25.9448	;	3	5	5	5	2	1	4	3	3	2	1	4	3	3	2	1	4	3	3	8.4	8.4	8.4	68.889	621	621;621;619	0	100.65	4.3	2.6	8.4	6.9
O35490	O35490	1	1	1	Betaine--homocysteine S-methyltransferase 1	Bhmt	23.9862				20.7411	28.5712			28.4104		25.326	Betaine--homocysteine S-methyltransferase 1	1	1	1	1	1	0	1	0	1	1	0	1	0	1	1	0	1	0	1	5.9	5.9	5.9	45.02	407	407	0	26.283	5.9	0	5.9	0
CON__P00978	CON__P00978	2	2	1			23.9444	22.9817	22.0991		21.6836	28.0319	27.0692			26.1865	25.7711		1	2	2	1	1	0	0	2	2	1	0	0	2	2	0	0	0	1	1	4.8	4.8	2.3	39.234	352	352	0	36	2.6	0	0	4.8
CON__P02070	CON__P02070	1	1	1			23.7941					27.2535			27.2535				1	1	1	1	0	0	1	0	0	0	0	1	0	0	0	0	1	0	0	13.1	13.1	13.1	15.954	145	145	0	33.661	0	0	13.1	0
CON__Q95M17	CON__Q95M17	1	1	1			23.5434	21.7529		22.0297		27.9357	26.1452	26.422	26.4647				1	1	1	1	1	1	1	0	0	1	1	1	0	0	1	1	1	0	0	3.2	3.2	3.2	52.129	472	472	0	6.6428	3.2	3.2	3.2	0
CON__Q3T052	CON__Q3T052	2	2	2			23.1425	22.3993	20.7449		20.9103	29.2158	27.8255			28.1648	26.3366		1	2	2	2	1	0	0	2	1	1	0	0	2	1	1	0	0	2	1	4.3	4.3	4.3	101.51	916	916	0	106.59	1.4	0	0	4.3
CON__Q3MHN2	CON__Q3MHN2	1	1	0			23.0082		22.3312			27.7631			26.3462	27.0861			1	1	1	0	0	0	1	1	0	0	0	1	1	0	0	0	0	0	0	2.2	2.2	0	61.998	548	548	0	9.8672	0	0	2.2	2.2
Q8K0E8	Q8K0E8	1	1	1	Fibrinogen beta chain;Fibrinopeptide B;Fibrinogen beta chain	Fgb	22.9175				22.0408	27.5614			26.4265		26.6847	Fibrinogen beta chain	1	1	1	1	0	0	1	0	1	0	0	1	0	1	0	0	1	0	1	3.5	3.5	3.5	54.752	481	481	0	55.914	0	0	3.5	0
CON__Q05443	CON__Q05443	1	1	0			22.2146	22.2146				26.3021	26.3021						1	1	1	0	1	0	0	0	0	1	0	0	0	0	0	0	0	0	0	5.3	5.3	0	38.756	342	342	0	13.173	5.3	0	0	0
CON__P01030	CON__P01030	3	2	2			21.6593	19.8378	20.915		18.6015	28.1511	26.3297			27.4068	25.0934		1	3	2	2	1	0	0	3	1	1	0	0	2	1	1	0	0	2	1	3.7	3.2	3.2	192.79	1741	1741	0	71.432	1.7	0	0	3.7
D3YXF4;D3YXN6;A0A2I3BQ03;P63101	D3YXF4;D3YXN6;A0A2I3BQ03;P63101	1;1;1;1	1;1;1;1	0;0;0;0	14-3-3 protein zeta/delta	Ywhaz	21.61		21.61			23.1949				23.1949		Isoform of P63101, 14-3-3 protein zeta/delta (Fragment);Isoform of P63101, 14-3-3 protein zeta/delta (Fragment);Isoform of P63101, 14-3-3 protein zeta/delta (Fragment);14-3-3 protein zeta/delta	4	1	1	0	0	0	0	1	0	0	0	0	1	0	0	0	0	0	0	31.8	31.8	0	5.0016	44	44;88;166;245	0	29.133	0	0	0	31.8
Q61292	Q61292	4	4	4	Laminin subunit beta-2	Lamb2	21.1179		20.9953	14.891	14.4713	28.3597		21.4608	23.5835	28.0619	25.5394	Laminin subunit beta-2	1	4	4	4	0	1	1	4	3	0	1	1	4	3	0	1	1	4	3	3.1	3.1	3.1	196.58	1799	1799	0	26.914	0	0.5	0.6	3.1
D3Z7C5;Q60665-2;Q60665	D3Z7C5;Q60665-2;Q60665	1;1;1	1;1;1	1;1;1	Ski-like protein	Skil	20.8147		20.8147			28.1805				28.1805		Isoform of Q60665, Ski-like protein;Isoform of Q60665, Isoform 2 of Ski-like protein;Ski-like protein	3	1	1	1	0	0	0	1	0	0	0	0	1	0	0	0	0	1	0	3.3	3.3	3.3	62.363	549	549;629;675	0.0087719	6.1513	0	0	0	3.3
CON__Q3SX14	CON__Q3SX14	4	4	2			20.1801			20.1801		25.2675		25.2675					1	4	4	2	0	1	0	1	2	0	1	0	1	2	0	0	0	0	2	6.7	6.7	3.8	85.686	781	781	0	36.594	0	1.2	0	1.7
Q05793	Q05793	34	3	3	Basement membrane-specific heparan sulfate proteoglycan core protein;Endorepellin;LG3 peptide	Hspg2	18.4574		18.4574			29.3871				29.3871		Basement membrane-specific heparan sulfate proteoglycan core protein	1	34	3	3	13	15	11	33	15	1	1	0	2	1	1	1	0	2	1	12.9	1.3	1.3	398.29	3707	3707	0	37.377	5.1	5.9	4.7	12.4
E9PV24-2;E9PV24	E9PV24-2;E9PV24	1;1	1;1	1;1	Fibrinogen alpha chain;Fibrinopeptide A;Fibrinogen alpha chain	Fga	18.3699		18.3699			23.1248				23.1248		Isoform of E9PV24, Isoform 2 of Fibrinogen alpha chain;Fibrinogen alpha chain	2	1	1	1	0	0	0	1	0	0	0	0	1	0	0	0	0	1	0	1.4	1.4	1.4	61.325	557	557;789	0.0084034	5.9487	0	0	0	1.4
G3X8P9;O54754	G3X8P9;O54754	1;1	1;1	1;1	Aldehyde oxidase 1	Aox1	18.0946				18.0946	24.139					24.139	Isoform of O54754, Aldehyde oxidase 1;Aldehyde oxidase 1	2	1	1	1	0	0	0	0	1	0	0	0	0	1	0	0	0	0	1	0.8	0.8	0.8	146.65	1333	1333;1333	0	6.3994	0	0	0	0
CON__ENSEMBL:ENSBTAP00000007350	CON__ENSEMBL:ENSBTAP00000007350	4	4	3			15.5926	14.0193	22.8182	15.0017		31.397	29.6106	29.4017	29.2715	29.2776			1	4	4	3	3	2	1	2	0	3	2	1	2	0	3	2	1	1	0	4	4	3.4	192.99	1742	1742	0	116.84	3.4	2.5	1.9	2.5
Q61001	Q61001	2	1	1	Laminin subunit alpha-5	Lama5	15.4289		15.4289			22.7508				22.7508		Laminin subunit alpha-5	1	2	1	1	1	2	0	2	0	1	1	0	1	0	1	1	0	1	0	0.6	0.4	0.4	404.05	3718	3718	0	16.566	0.4	0.6	0	0.6
A0A0N4SUN5	A0A0N4SUN5	1	1	1			-2											Isoform of Q9JHR9, Nuclear receptor-interacting protein 2 (Fragment)	1	1	1	1	1	0	0	0	0	1	0	0	0	0	1	0	0	0	0	3.7	3.7	3.7	20.991	190	190	0	6.7542	3.7	0	0	0
D3Z0B4;Q9Z110-2;Q9Z110	D3Z0B4;Q9Z110-2;Q9Z110	1;1;1	1;1;1	0;0;0	Delta-1-pyrroline-5-carboxylate synthase;Glutamate 5-kinase;Gamma-glutamyl phosphate reductase	Aldh18a1	-2											Isoform of Q9Z110, Delta-1-pyrroline-5-carboxylate synthase (Fragment);Isoform of Q9Z110, Isoform Short of Delta-1-pyrroline-5-carboxylate synthase;Delta-1-pyrroline-5-carboxylate synthase	3	1	1	0	1	0	0	0	0	1	0	0	0	0	0	0	0	0	0	4.6	4.6	0	19.141	173	173;793;795	0.008547	5.9757	4.6	0	0	0
O35945	O35945	1	1	1	Aldehyde dehydrogenase, cytosolic 1	Aldh1a7	-2											Aldehyde dehydrogenase, cytosolic 1	1	1	1	1	0	0	0	0	1	0	0	0	0	1	0	0	0	0	1	2.8	2.8	2.8	54.587	501	501	0	8.1291	0	0	0	0
Q792Z0	Q792Z0	1	1	1		Prss3	-2											Protease, serine 3	1	1	1	1	0	0	0	1	0	0	0	0	1	0	0	0	0	1	0	4.1	4.1	4.1	26.183	246	246	0.0084746	5.9507	0	0	0	4.1
CON__P17697	CON__P17697	1	1	1			-2												1	1	1	1	1	0	0	0	0	1	0	0	0	0	1	0	0	0	0	2.7	2.7	2.7	51.113	439	439	0	7.6705	2.7	0	0	0
CON__Q9TT36	CON__Q9TT36	1	1	0			-2												1	1	1	0	0	1	0	0	0	0	1	0	0	0	0	0	0	0	0	2.4	2.4	0	46.017	411	411	0	8.1012	0	2.4	0	0
[truncated: 36 more columns]
